# Supplementary material for: Leelamine Mediates Cancer Cell Death through Inhibition of Intracellular Cholesterol Transport
Source: Oxford University Press journal article supplement (doi:10.1158/1535-7163.mct-13-0868), 2014-04-01
Supplement: 15357163mct130868-sup-tab_4.xlsx [file 15357163mct130868-sup-tab_4.xlsx]

## Sheet: KINEXUS PROTEIN ARRAY DATA
Supplementary Table
			FLAGS (LEELAMINE , CONTROL)				%CFC (LEELAMINE , CONTROL)				Z Scores								Z RATIOS
Uniprot Link	Target Protein Name	Phospho Site (Human)	3	6	12	24	3	6	12	24	Control	Leelamine	Control	Leelamine	Control	Leelamine	Control	Leelamine	3	6	12	24
P63104	14-3-3 z	Pan-specific	0, 0	0, 0	0, 1	0, 0	-39.4393	-44.4721	30.3502	-39.9797	0.669776	-0.00500669	0.447226	-0.226178	0.279807	0.544738	0.302585	-0.26656	-1.11818	-0.842704	0.387964	-0.910644
Q13541	4E-BP1	S65	0, 0	0, 0	0, 0	0, 0	-49.43	-27.8282	-19.5809	-7.56386	1.72683	0.883418	1.24211	0.838659	0.934854	0.834489	0.559163	0.553783	-1.39761	-0.504888	-0.146974	-0.00860881
Q13541	4E-BP1	T45	0, 3	0, 0	0, 0	0, 0	-33.4537	-24.7026	7.39705	-1.35263	0.0561133	-0.7805	0.773622	0.498969	0.390376	0.514377	-0.0880171	-0.117953	-1.38635	-0.343704	0.181587	-0.047898
Q13541	4E-BP1	T70	0, 0	0, 0	0, 0	2, 2	-30.9488	-27.4642	-16.3087	-16.8115	-0.351555	-1.13712	-0.260878	-0.668443	-0.683446	-1.27962	-1.43298	-1.79449	-1.30175	-0.510031	-0.873029	-0.57843
P00519	Abl	Pan-specific	4, 4	4, 4	4, 4	2, 2	-36.66	-39.7435	-26.4174	-99.2863	-8.18772	-9.59239	-6.10464	-6.62699	-6.19606	-8.71578	-4.41777	-7.91933	-2.32767	-0.653668	-3.68986	-5.60256
Q13085	AcCoA carboxylase	S80	0, 0	0, 0	0, 1	0, 0	-56.6943	-9.93574	-28.7331	-28.4727	0.894477	-0.272215	0.737458	0.55239	0.381758	-0.014491	0.00586029	-0.423247	-1.93332	-0.231596	-0.580265	-0.68658
NA	Acetylated Lysine	Pan-specific	0, 0	0, 0	0, 0	0, 0	-46.5724	-28.6613	-21.9964	-1.26676	1.05455	0.220034	1.41561	0.965404	1.07932	0.975876	0.760501	0.815266	-1.38288	-0.563398	-0.151489	0.0876243
NA	Acetylated Lysine	Pan-specific	0, 0	0, 0	0, 0	0, 0	-40.96	-42.2476	-42.9592	-20.1989	0.591476	-0.205365	0.295679	-0.198938	0.225288	-0.620347	-0.38644	-0.705356	-1.32044	-0.618969	-1.23834	-0.510273
Q07912	ACK1	Pan-specific	4, 4	4, 4	4, 2	3, 3	-36.66	-39.7435	-26.4174	184.507	-8.18772	-9.59239	-6.10464	-6.62699	-6.19606	-8.71578	-1.14108	0.00466806	-2.32767	-0.653668	-3.68986	1.83322
P35611	Adducin a, g	S726, S693	0, 0	0, 0	0, 0	0, 0	-37.9251	-37.3642	-23.9526	-23.7921	0.728123	-0.0323458	0.365627	-0.236623	0.188182	-0.25243	-0.458772	-0.832037	-1.26017	-0.75366	-0.64523	-0.597232
O95831	AIF	Pan-specific	4, 4	4, 4	4, 4	3, 0	-36.66	-39.7435	-26.4174	113.937	-8.18772	-9.59239	-6.10464	-6.62699	-6.19606	-8.71578	-1.44158	-0.75879	-2.32767	-0.653668	-3.68986	1.09248
P54819	AK2	Pan-specific	0, 0	0, 1	1, 0	0, 0	-43.4387	1.50574	-0.637747	4.43616	0.774533	-0.0243276	0.430636	0.32039	0.326456	0.187052	-0.216872	-0.183202	-1.32379	-0.137963	-0.204142	0.0538729
Q9UM73	ALK	Pan-specific	0, 0	0, 0	0, 0	0, 0	-49.9625	-87.4991	-69.0085	-62.738	2.0142	1.15884	1.71331	-0.396076	1.51943	0.32594	1.56699	0.502623	-1.41741	-2.6397	-1.74774	-1.703
Q96Q40	ALS2CR7 (PFTAIRE2)	Pan-specific	0, 0	0, 0	0, 0	0, 0	-28.9214	-33.8787	-39.5045	2.38875	0.130227	-0.434124	0.0755005	-0.377305	-0.172619	-0.869129	-0.626453	-0.57969	-0.935185	-0.566645	-1.01996	0.0748226
Q13131	AMPKa1/2	T183	0, 0	0, 0	2, 2	2, 2	-20.9585	-37.9069	-48.2359	-18.3759	0.315956	-0.1375	-0.420843	-1.15196	-0.979081	-1.88576	-1.85207	-1.98216	-0.75142	-0.914922	-1.32773	-0.208149
P57078	ANKRD3	Pan-specific	0, 0	0, 0	0, 0	0, 0	-43.2126	-60.4938	-44.7671	-22.3625	0.42864	-0.394178	0.651561	-0.261005	0.235365	-0.525727	-0.137144	-0.516512	-1.36349	-1.14199	-1.11454	-0.606996
O95757	APG1	Pan-specific	4, 4	4, 4	4, 4	0, 0	-36.66	-39.7435	-26.4174	547.338	-8.18772	-9.59239	-6.10464	-6.62699	-6.19606	-8.71578	-3.53759	-0.95949	-2.32767	-0.653668	-3.68986	4.12502
P34932	APG2	Pan-specific	4, 4	1, 4	4, 4	0, 0	-36.66	129285	-26.4174	257.613	-8.18772	-9.59239	-6.10464	-2.70736	-6.19606	-8.71578	-1.71423	-0.10561	-2.32767	4.25139	-3.68986	2.57383
P49407	Arrestin b1	Pan-specific	0, 0	0, 0	0, 0	0, 0	-27.8251	-13.3604	-16.3407	34.2851	1.72447	1.33157	1.40432	1.19112	1.21703	1.29391	1.11662	1.51993	-0.651076	-0.266794	0.11259	0.645311
P49407	Arrestin b1	S412	0, 0	0, 0	0, 0	0, 0	-47.9887	-51.7592	-59.3189	-48.326	2.15129	1.32717	1.73185	0.923803	1.65966	0.904075	1.33742	0.670191	-1.36564	-1.0112	-1.10648	-1.06759
Q99683	ASK1 (MAP3K5)	Pan-specific	4, 4	4, 4	4, 4	0, 0	-36.66	-39.7435	-26.4174	372.711	-8.18772	-9.59239	-6.10464	-6.62699	-6.19606	-8.71578	-2.30519	-0.63556	-2.32767	-0.653668	-3.68986	2.67144
Q99683	ASK1 (MAP3K5)	Pan-specific	0, 0	0, 0	0, 1	0, 0	-37.0639	-20.0619	-33.832	45.6479	0.78255	0.118406	0.897957	0.735097	0.666782	0.175785	-0.122731	0.172846	-1.10055	-0.203804	-0.719013	0.472928
Q99683	ASK1 (MAP3K5)	S1046	0, 0	0, 0	0, 0	0, 0	-40.1867	-31.3934	-38.3156	66.8986	0.107378	-0.614147	0.36687	-0.0534922	0.141319	-0.582112	-0.411003	0.151326	-1.19564	-0.526045	-1.05939	0.899739
P15336	ATF2	Pan-specific	0, 0	0, 0	0, 2	2, 2	-31.9617	-29.3363	-53.7696	-36.2354	-0.468872	-1.1206	-0.492886	-0.858066	-1.01113	-2.27611	-2.02484	-2.96394	-1.07997	-0.456989	-1.85243	-1.50257
P15336	ATF2	T69/T71	0, 0	0, 0	0, 0	0, 0	-40.7262	-43.499	-4.86318	9.67618	1.80816	1.14662	1.69086	1.06336	1.22896	1.44723	0.96916	1.10915	-1.09624	-0.78526	0.319633	0.223988
P15336	ATF2	T69/T71	0, 0	0, 0	0, 0	0, 1	-45.3407	-37.294	-47.1845	-20.1457	2.29168	1.56028	1.99217	1.44274	1.73006	1.32757	1.76312	1.57519	-1.212	-0.687562	-0.589401	-0.300686
O14965	Aurora A (AIK)	Pan-specific	0, 0	0, 0	0, 0	1, 0	-32.4967	-47.0381	-59.4796	22.2765	0.652629	0.131592	0.860407	0.137648	0.815276	-0.226312	0.309716	0.463319	-0.863408	-0.904468	-1.52529	0.245768
O14965	Aurora A (AIK)	Pan-specific	0, 0	0, 0	0, 0	0, 0	-34.7124	-33.663	-21.9228	-42.4131	1.30339	0.747833	0.690566	0.266827	0.542431	0.330655	0.244893	-0.388369	-0.920617	-0.530271	-0.310124	-1.01323
Q96GD4	Aurora B (AIM-1)	Pan-specific	0, 0	0, 0	0, 0	0, 0	-24.4134	-32.8892	19.0257	72.251	0.507163	0.0341665	0.367936	-0.183906	-0.152001	-0.0761562	-0.985134	-0.21134	-0.783802	-0.69058	0.111067	1.23809
Q9UQB9	Aurora C (AIK3)	Pan-specific	0, 0	0, 0	0, 0	0, 0	-30.272	-32.0162	-23.4492	2.42433	-0.0460599	-0.557778	0.0667971	-0.441453	-0.137152	-0.713174	-0.694145	-0.681766	-0.847967	-0.636029	-0.843524	0.0198066
P30530	Axl	Pan-specific	0, 0	0, 0	0, 0	0, 0	-23.7047	-30.2994	-22.1332	-20.2214	-0.0925145	-0.493874	-0.251038	-0.494064	-0.168916	-0.660561	-0.504239	-0.805199	-0.665092	-0.304125	-0.719962	-0.481542
P06748	MEK1/2+B23 (NPM)	S218+S222, S4	2, 0	2, 0	2, 2	2, 2	-28.4914	40.9671	-52.5849	-63.9569	-1.36545	-1.69452	-0.858075	-0.615621	-1.32525	-2.48737	-2.24271	-4.07524	-0.545311	0.303409	-1.7018	-2.93209
P06748	B23 (NPM)	T199	0, 0	0, 0	0, 0	0, 0	-27.3374	-16.6843	-5.88426	-31.776	1.7377	1.36944	1.52308	1.29659	1.15703	1.40631	1.26283	0.899761	-0.610244	-0.283425	0.365045	-0.580916
P06748	B23 (NPM)	T199	0, 0	0, 0	0, 0	2, 0	-50.7204	-36.6436	-24.5441	-6.19119	0.765937	-0.327908	-0.138817	-0.869463	-0.179741	-0.874597	-1.62435	-1.94444	-1.81261	-0.914337	-1.01754	-0.512141
P06748	B23 (NPM)	T234/T237	0, 0	0, 0	0, 0	0, 0	-45.33	-34.6403	-16.4852	57.61	2.03072	1.28684	1.61089	1.1064	1.40904	1.47325	1.20555	1.80655	-1.23269	-0.631321	0.0940342	0.961606
Q92934	Bad	S75	0, 0	0, 0	0, 0	0, 0	-46.137	-80.437	-63.424	-63.5509	2.01504	1.24911	1.8375	0.126921	1.47139	0.486232	1.6723	0.653625	-1.26922	-2.14063	-1.44266	-1.6299
Q92934	Bad	S99	0, 0	0, 0	0, 0	0, 0	-26.2993	-23.839	-35.525	3.94695	-0.0611588	-0.541259	0.021184	-0.434467	-0.0383692	-0.775311	-0.887295	-0.904311	-0.795573	-0.570206	-1.07917	-0.0272253
Q16611	Bak	Pan-specific	4, 4	2, 2	2, 2	0, 3	-36.66	-39.7435	-26.4174	-4.77024	-8.18772	-9.59239	-6.10464	-6.62699	-6.19606	-8.71578	-0.728745	-0.785263	-2.32767	-0.653668	-3.68986	-0.0904296
Q07812	Bax	Pan-specific	2, 2	0, 2	2, 2	0, 0	-36.66	-97.9063	-99.1979	-18.4395	-8.18772	-9.59239	-2.82079	-6.62699	-2.10083	-8.71578	-0.0855645	-0.423978	-2.32767	-4.76312	-9.6869	-0.541468
P10415	Bcl2	Pan-specific	0, 0	0, 0	0, 0	0, 3	-44.4411	-34.3002	-53.2713	-27.2749	0.0679608	-0.851408	-0.0027948	-0.438278	-0.0578835	-1.37763	-0.923442	-1.3144	-1.52348	-0.544967	-1.93263	-0.625542
Q07817	Bcl-xL	Pan-specific	0, 0	0, 0	0, 0	0, 0	-55.899	-79.3496	-39.9659	-51.2999	2.5252	1.7189	2.58752	1.05775	1.32941	0.954802	2.72932	2.22244	-1.33611	-1.91438	-0.548579	-0.811017
Q07817	Bcl-xS/L	Pan-specific	2, 3	2, 0	0, 0	0, 0	-90.4058	-80.0442	-92.5003	-22.3596	-0.854672	-4.7779	-0.482478	-5.68621	0.25228	-2.20525	1.15639	0.943571	-6.50118	-6.512	-3.5988	-0.340508
P55957	Bid	Pan-specific	4, 4	4, 4	4, 4	3, 0	-36.66	-39.7435	-26.4174	146.347	-8.18772	-9.59239	-6.10464	-6.62699	-6.19606	-8.71578	-2.32889	-1.20152	-2.32767	-0.653668	-3.68986	1.8038
P51451	BLK	Pan-specific	0, 0	0, 0	0, 0	0, 0	-47.919	-27.7791	35.0322	-7.51777	0.197793	-0.875173	-0.118106	-0.55606	-0.83372	-0.642127	-1.00721	-1.25199	-1.77801	-0.548059	0.280568	-0.391663
O75498	BLNK	Y84	0, 0	0, 0	0, 0	0, 0	-49.1539	-43.2561	-33.8614	-38.4225	0.959416	0.00392923	0.515965	-0.0608316	0.329269	-0.205191	-0.194195	-0.509	-1.58333	-0.721809	-0.78266	-0.503695
P51813	BMX (Etk)	Pan-specific	0, 0	0, 0	0, 0	0, 0	-39.3693	-16.4984	-9.57081	8.81307	1.87871	1.25853	1.62134	1.31032	1.34052	1.57226	1.14439	1.31338	-1.02769	-0.389212	0.339346	0.270397
P51813	BMX (Etk)	Y40	0, 0	2, 2	0, 2	2, 0	-26.2425	-19.6416	-4.00606	-87.8788	-0.764747	-1.33501	-0.762302	-1.06745	-0.858541	-0.961061	-0.700069	-2.58771	-0.944983	-0.381863	-0.15013	-3.02027
P38398	BRCA1	S1497	0, 0	0, 0	0, 0	0, 0	-37.1178	-49.9277	-36.5941	-19.458	0.540122	-0.0478991	0.362749	-0.32166	0.353092	-0.0289173	-0.357273	-0.666702	-0.974409	-0.856476	-0.559413	-0.495093
P25440	BRD2	Pan-specific	0, 0	0, 0	0, 0	0, 0	-28.947	-28.4221	10.3381	8.08339	0.0632842	-0.605887	-0.092671	-0.602601	-0.548163	-0.600263	-1.15659	-1.21545	-1.10888	-0.638131	-0.0762947	-0.0941812
Q06187	Btk	Pan-specific	4, 4	4, 4	4, 4	0, 0	-36.66	-39.7435	-26.4174	221.479	-8.18772	-9.59239	-6.10464	-6.62699	-6.19606	-6.73981	-3.0453	-1.17119	-2.32767	-0.653668	-0.796262	2.99862
Q06187	Btk	Y223	0, 0	0, 0	0, 0	2, 2	-29.1735	-15.9183	-21.3056	-15.9429	0.0514812	-0.506819	-0.410612	-0.550379	-0.473097	-0.952952	-1.75479	-2.13032	-0.925159	-0.174905	-0.702696	-0.600847
O43683	BUB1A	Pan-specific	0, 0	0, 0	0, 0	0, 0	5.8171	-59.9469	-22.636	-6.02686	0.0437314	0.0652249	0.503851	-0.401687	-0.100402	-0.765411	-0.649696	-0.824607	0.0356168	-1.1332	-0.973835	-0.279861
Q05682	Caldesmon	S789	0, 0	0, 0	0, 0	3, 0	-20.1197	-22.3482	-22.4164	-22.1042	-0.208183	-0.510152	-0.118994	-0.344031	-0.276066	-0.933245	-0.766402	-1.20664	-0.500392	-0.281613	-0.962369	-0.704391
P27824	Calnexin	Pan-specific	0, 0	0, 0	0, 0	0, 0	12.7745	29.8737	196.112	20.4913	1.41296	1.58467	1.30442	1.49197	1.05251	2.75549	1.622	1.94062	0.284541	0.234691	2.49384	0.509796
P27824	Calnexin	Pan-specific	0, 0	0, 0	0, 0	0, 0	-26.9657	-82.0603	-28.9527	-47.7895	1.27743	0.826131	2.08081	0.149468	0.943864	0.690085	1.19359	0.528446	-0.747841	-2.41689	-0.371631	-1.06424
P27824	Calnexin	Pan-specific	3, 0	0, 0	0, 0	0, 0	-2.89527	-1.08953	-42.1653	22.5125	-1.40032	-1.83209	-0.592354	-0.614033	-0.436098	-1.47791	-0.0342489	0.292909	-0.715479	-0.0271294	-1.52562	0.523459
P27797	Calreticulin	Pan-specific	0, 0	0, 0	0, 0	0, 0	13.1887	129.248	170.609	34.7879	1.9624	2.21014	1.60102	2.37586	1.47164	3.18493	1.95517	2.43857	0.410529	0.969648	2.50893	0.773449
Q14012	CAMK1a	Pan-specific	4, 4	4, 4	4, 4	3, 0	-36.66	-39.7435	-26.4174	-16.4081	-8.18772	-9.59239	-6.10464	-6.62699	-6.19606	-8.71578	-0.914802	-1.09385	-2.32767	-0.653668	-3.68986	-0.286474
Q8IU85	CaMK1d	Pan-specific	0, 0	0, 0	0, 0	0, 0	-36.3489	-37.6132	-50.3879	-20.2443	0.548852	-0.197346	0.535184	-0.0224059	0.362885	-0.593757	-0.304335	-0.590815	-1.23652	-0.697773	-1.4009	-0.458374
Q8IU85	CaMK1d	Pan-specific	4, 4	4, 0	4, 2	0, 0	-36.66	560.904	-26.4174	-48.7826	-8.18772	-9.59239	-3.7323	-3.52094	-6.19606	-8.71578	-0.340029	-1.19649	-2.32767	0.264505	-3.68986	-1.37035
Q9UQM7	CaMK2a	T286	0, 0	0, 3	0, 0	0, 0	-15.3055	-47.6217	-57.4102	-48.0774	0.820097	0.54762	0.607902	-0.0818615	0.510346	-0.390611	0.414046	-0.285846	-0.451521	-0.863176	-1.31936	-1.11984
Q9UQM7	CaMK2a	T286	0, 0	0, 0	0, 0	0, 0	-17.5564	-3.58293	-13.8946	-1.73906	1.36334	1.09189	1.35952	1.26342	1.15453	1.20476	1.06889	1.1299	-0.449824	-0.12026	0.073557	0.0976219
Q13554	CAMK2b	Pan-specific	0, 0	0, 0	0, 0	0, 0	-29.9367	-39.1011	-41.6283	-7.47155	0.185367	-0.396304	0.482714	-0.0466822	0.448207	-0.232299	0.390652	0.32198	-0.963884	-0.662492	-0.996529	-0.109876
Q13554	CAMK2b	Pan-specific	0, 0	0, 0	0, 0	0, 0	-27.1532	-29.4236	-49.2475	-35.3759	-0.106277	-0.750698	-0.0348376	-0.497098	-0.245584	-1.43307	-0.722519	-1.29706	-1.06787	-0.578477	-1.73895	-0.919283
Q13557	CAMK2d	Pan-specific	0, 0	0, 0	0, 0	0, 0	-47.8446	-44.0712	-45.3822	-34.4281	0.161538	-0.696503	0.49767	-0.133801	0.346611	-0.448599	0.533128	0.0704449	-1.42186	-0.790229	-1.1645	-0.740303
Q13557	CAMK2d	Pan-specific	0, 0	0, 3	0, 0	0, 0	-34.2547	-45.5432	-34.9799	13.3667	0.489392	-0.10876	0.864209	0.222826	0.373176	-0.165165	-0.299015	-0.0714625	-0.991196	-0.802632	-0.788344	0.364088
Q13555	CAMK2g	Pan-specific	0, 0	0, 0	0, 0	0, 0	-23.929	-57.8456	-50.2486	-32.1878	0.684474	0.242494	1.20037	0.269226	0.747118	-0.0682359	0.589877	0.171912	-0.732404	-1.16525	-1.194	-0.668753
Q16566	CaMK4	Pan-specific	0, 0	0, 0	0, 0	0, 2	-9.03228	-4.72629	-7.62517	-44.347	-0.647208	-0.885413	-0.670721	-0.700764	-0.945928	-1.48578	-1.11508	-1.99604	-0.394729	-0.0375971	-0.790557	-1.40955
Q16566	CaMK4	Pan-specific	0, 0	2, 2	2, 2	2, 2	-28.9552	-17.4812	-33.4705	-19.6033	-0.546192	-1.28405	-0.640383	-0.93347	-0.986879	-2.06811	-2.42035	-2.66421	-1.22271	-0.366772	-1.58335	-0.390177
Q16566	CaMK4	Pan-specific	0, 0	0, 0	0, 0	0, 0	-32.0433	-26.5535	-45.1188	-41.018	0.159801	-0.386547	0.0870459	-0.23687	0.0317826	-0.865074	-0.357235	-1.01069	-0.905351	-0.405351	-1.31335	-1.04554
Q8N5S9	CaMKK (CaMKK2)	Pan-specific	0, 0	0, 0	0, 0	0, 0	-33.0873	-25.4494	-34.0235	-16.9566	0.269056	-0.333173	0.244667	-0.0701469	0.0465964	-0.619168	-0.492693	-0.597758	-0.997951	-0.393961	-0.974941	-0.168106
P55060	CAS	Pan-specific	0, 0	0, 0	0, 0	0, 0	-8.42299	19.3916	-3.9316	7.61456	1.31382	1.23264	1.17636	1.29652	1.05742	1.25587	1.10243	1.26791	-0.13451	0.15037	0.2906	0.264769
O14936	CASK/Lin2	Pan-specific	0, 0	0, 0	2, 0	0, 0	-16.321	-16.5473	-28.1302	-50.4702	-0.764613	-1.02452	-0.646458	-0.848786	-0.830551	-1.63405	-0.991964	-2.09552	-0.430697	-0.253196	-1.17664	-1.76571
O08736	CASP12	Pan-specific	0, 0	0, 0	0, 0	3, 3	-28.6226	-24.7608	-21.4472	-53.179	0.0300578	-0.610911	0.26321	-0.132531	-0.208657	-0.724065	0.0707971	-0.81068	-1.06215	-0.495235	-0.754761	-1.41038
P29466	CASP1ab	Pan-specific	4, 4	4, 2	4, 2	0, 0	-36.66	-39.7435	-26.4174	41.4837	-8.18772	-9.59239	-6.10464	-6.62699	-6.19606	-8.71578	-0.719312	-0.423409	-2.32767	-0.653668	-3.68986	0.473451
P42575	CASP2	Pan-specific	0, 0	0, 0	0, 0	0, 0	-35.9256	-14.0806	-24.2337	-10.8261	0.348781	-0.319406	0.131273	-0.0558563	-0.0645782	-0.567262	-0.459112	-0.527596	-1.10725	-0.234176	-0.736127	-0.109577
P42574	CASP3	Pan-specific	0, 0	0, 0	0, 0	0, 0	-3.95872	7.45123	4.56677	8.75905	1.2805	1.24994	1.29455	1.32295	1.08175	1.40357	1.04432	1.22142	-0.0506482	0.0355406	0.47128	0.283357
P49662	CASP4	Pan-specific	0, 0	0, 0	0, 0	0, 0	-20.0246	-6.82797	-24.5867	-18.6007	0.348648	0.0366299	0.301505	0.207195	0.302597	-0.0361304	-0.02508	-0.308706	-0.517044	-0.118021	-0.496031	-0.453807
P51878	CASP5	Pan-specific	0, 0	0, 0	0, 0	0, 0	-24.0677	-9.02106	-34.0584	-1.14954	0.0334428	-0.495903	0.0728717	-0.123251	0.0898627	-0.584658	-0.504466	-0.579406	-0.877178	-0.24543	-0.987764	-0.119906
P55212	CASP6	Pan-specific	0, 0	0, 0	0, 0	0, 0	-30.3684	-21.7506	-26.3634	-20.0309	-0.225242	-0.809095	-0.223578	-0.507966	-0.464159	-1.03432	-0.932951	-1.39479	-0.967502	-0.355886	-0.834946	-0.73896
P55210	CASP7	Pan-specific	0, 0	0, 0	0, 0	0, 0	-42.7149	-23.4462	-38.8309	-45.4657	0.177305	-0.661628	-0.0512853	-0.355146	-0.0652192	-0.770549	-0.380327	-1.11573	-1.39019	-0.380254	-1.03288	-1.17666
P55211	CASP9	Pan-specific	0, 0	0, 0	2, 2	0, 2	4.51386	20.0409	-33.2416	-35.6126	-0.799131	-0.894445	-0.914594	-0.670348	-1.02851	-1.92578	-1.60368	-2.35603	-0.157945	0.305651	-1.31396	-1.20378
P35222	Catenin b1	Pan-specific	2, 4	2, 0	2, 2	0, 0	-96.8022	499.785	-92.3286	32.154	-8.18772	-9.59239	-4.06076	-3.26974	-2.01968	-7.45688	0.312471	0.643556	-2.32767	0.989887	-7.96221	0.529743
P51636	Caveolin 2	Pan-specific	0, 0	0, 0	0, 0	0, 0	-15.4083	12.7667	12.6709	5.41447	1.31114	1.1158	1.16563	1.22126	0.919613	1.26963	1.10243	1.23514	-0.323702	0.0696106	0.512569	0.212342
P51636	Caveolin 2	S36	0, 0	0, 0	1, 0	0, 0	-12.256	-8.58223	0.707572	-12.025	1.45594	1.34036	1.35508	1.19074	1.0784	1.34115	1.15186	1.07147	-0.191532	-0.205665	0.384775	-0.128622
P08575	CD45	Pan-specific	0, 0	0, 0	0, 0	0, 0	-5.99773	-2.5743	4.42623	-10.0196	1.31453	1.28959	1.26247	1.17867	1.00479	1.2983	1.22132	1.20156	-0.0413218	-0.104871	0.429808	-0.031617
P30305	Cdc25B	Pan-specific	0, 0	0, 0	0, 0	0, 0	0.405107	75.3272	2.67753	8.08812	1.26767	1.33369	1.28815	1.80435	1.00807	1.29589	1.2054	1.3736	0.1094	0.645966	0.421489	0.269119
P30307	Cdc25C	Pan-specific	4, 4	4, 4	2, 4	0, 0	-36.66	-39.7435	-26.4174	285.398	-8.18772	-9.59239	-6.10464	-6.62699	-6.19606	-8.71578	-1.45229	-0.0821817	-2.32767	-0.653668	-3.68986	2.19221
Q13972	Cdc25C	S216	0, 0	0, 0	0, 0	0, 0	-33.2298	-23.798	8.32394	-62.5845	-0.414534	-1.19237	-0.347415	-0.912687	-0.950699	-1.46664	-1.06347	-2.30134	-1.28896	-0.707387	-0.75554	-1.98062
Q14004	CDC2L5 (CHED)	Pan-specific	0, 0	0, 0	0, 0	0, 0	-21.1529	-26.1285	-5.97032	-13.5725	0.650135	0.293019	0.856606	0.441983	0.620631	0.603103	0.720958	0.592071	-0.591776	-0.518864	-0.025667	-0.206222
P49427	Cdc34	Pan-specific	0, 0	0, 0	0, 0	0, 0	-10.8092	29.6893	6.33683	1.46891	1.3478	1.2096	1.20418	1.37171	0.962096	1.22593	1.18797	1.30644	-0.229004	0.209659	0.386359	0.189558
P60953	Cdc42	Pan-specific	0, 0	0, 0	0, 0	0, 0	-6.7027	-12.2282	-3.27877	16.4026	1.3017	1.23863	1.31583	1.12433	1.05073	1.22537	1.13533	1.38472	-0.10451	-0.239644	0.255736	0.399031
P06493	CDK1 (CDC2)	Pan-specific	0, 0	0, 0	0, 0	0, 0	-7.85269	-9.84815	-7.79785	-19.6169	1.51638	1.47367	1.37096	1.21364	1.13587	1.29222	1.55933	1.40689	-0.0707722	-0.196879	0.228948	-0.243899
P06493	CDK1 (CDC2)	Pan-specific	0, 0	0, 0	0, 0	0, 0	-22.0278	76.5831	2.76877	0.359278	1.41474	1.07513	1.20176	1.71222	1.008	1.23159	1.10752	1.193	-0.56277	0.63879	0.327425	0.136757
P06493	CDK1 (CDC2)	Pan-specific	2, 4	2, 0	2, 2	0, 0	-36.66	245.893	-51.9488	10.2649	-8.18772	-9.59239	-1.88075	-0.774405	-2.20004	-5.05081	0.259872	0.347235	-2.32767	1.38449	-4.17464	0.139782
P06493	CDK1 (CDC2)	Pan-specific	0, 0	0, 0	0, 0	0, 0	9.58667	4.84371	-9.00792	-28.7625	-0.528287	-0.461898	-0.529121	-0.513047	-0.556069	-1.12984	-1.3085	-1.72043	0.110013	0.0201154	-0.840225	-0.659101
P06493	CDK1 (CDC2)	Pan-specific	4, 4	4, 4	4, 4	0, 0	-36.66	-39.7435	-26.4174	161.164	-8.18772	-9.59239	-6.10464	-6.62699	-6.19606	-8.71578	-1.00317	0.124366	-2.32767	-0.653668	-3.68986	1.80408
P06493	CDK1 (CDC2)	Pan-specific	4, 4	4, 4	4, 4	3, 0	-36.66	-39.7435	-26.4174	198.202	-8.18772	-9.59239	-6.10464	-6.62699	-6.19606	-8.71578	-1.47218	-0.251049	-2.32767	-0.653668	-3.68986	1.95383
P06493	CDK1/2	T14+Y15	0, 0	0, 0	0, 0	0, 0	-18.2826	-18.3929	23.5591	-12.0677	0.791102	0.486228	0.609358	0.345866	0.457857	0.778151	0.378842	0.202892	-0.505206	-0.329736	0.469037	-0.281523
P06493	CDK1/2	Y15	0, 0	0, 0	0, 0	0, 3	-37.8329	-22.4111	-69.9458	-50.9832	-0.254905	-0.964049	-0.436439	-0.620455	-0.389912	-2.19418	-0.805341	-1.83412	-1.17512	-0.23028	-2.64215	-1.64607
P06493	CDK1/2	Y15	0, 0	0, 0	2, 2	2, 2	17.6152	48.8364	-2.46696	-19.4239	-1.26862	-1.04558	-1.48188	-0.887952	-1.23757	-1.57536	-2.29889	-2.15663	0.369594	0.743246	-0.494644	0.22762
P06493	CDK1/2	Y15	0, 0	0, 0	0, 0	0, 3	-22.0236	-28.4898	-53.6757	-37.8117	-0.332715	-0.761228	-0.148053	-0.499744	-0.304911	-1.37692	-0.572232	-1.10249	-0.710087	-0.44011	-1.56985	-0.848429
P06493	CDK1/2	T161	0, 0	0, 0	0, 0	0, 0	-6.09074	-25.1759	2.27167	-21.5396	0.890424	0.808984	0.0168856	-0.223779	0.266204	0.295626	0.553503	0.300989	-0.134955	-0.30117	0.0430861	-0.404029
Q15131	CDK10	Pan-specific	0, 0	0, 0	0, 0	0, 0	-36.125	5.54353	31.8919	5.13173	-0.0678397	-0.992692	-0.374342	-0.487042	-0.445179	-0.329889	-0.359612	-0.315446	-1.53257	-0.141033	0.16883	0.0706675
P24941	CDK2	Pan-specific	4, 2	2, 0	2, 2	0, 0	-36.66	-99.8675	-95.6509	-13.5952	-8.18772	-9.59239	-0.592923	-6.62699	-1.02755	-8.71578	0.183956	0.0161181	-2.32767	-7.55109	-11.2586	-0.268543
P24941	CDK2	Pan-specific	0, 0	0, 0	0, 0	0, 0	-16.3943	15.5072	-24.3251	-14.6481	0.0150926	-0.423063	-0.130859	0.001588	-0.225643	-0.829716	-0.524803	-0.787861	-0.726067	0.165746	-0.884601	-0.420898
P24941	CDK2	Pan-specific	0, 0	0, 0	0, 0	0, 0	9.37437	14.9187	-0.93637	-8.14003	1.18127	1.25399	1.2137	1.27927	0.891659	1.06036	1.28675	1.27355	0.120515	0.0820555	0.247043	-0.0211182
P24941	CDK2	Pan-specific	0, 0	0, 0	0, 0	0, 0	-11.9053	-7.28874	-18.5035	-26.6354	-0.182528	-0.647427	-0.164963	-0.347595	-0.457678	-1.08321	-0.639433	-1.08126	-0.770383	-0.228547	-0.916029	-0.70693
P24941	CDK2	Pan-specific	4, 4	4, 4	3, 0	0, 0	-36.66	-39.7435	-99.9259	21.5186	-8.18772	-9.59239	-6.10464	-6.62699	0.207412	-8.71578	-0.484732	-0.247314	-2.32767	-0.653668	-13.0671	0.379874
P24941	CDK2	Pan-specific	4, 4	4, 4	4, 2	0, 0	-36.66	-39.7435	-26.4174	-23.6805	-8.18772	-9.59239	-6.10464	-6.62699	-6.19606	-8.71578	-0.205251	-0.569052	-2.32767	-0.653668	-3.68986	-0.58209
P11802	CDK4	Pan-specific	0, 0	0, 0	0, 0	0, 0	-31.2981	-18.572	-20.1316	-38.7414	0.510103	-0.0372243	0.193832	-0.069547	-0.0996898	-0.533365	-0.192761	-0.752009	-0.906975	-0.329594	-0.635071	-0.894808
P11802	CDK4	Pan-specific	4, 4	4, 4	2, 4	0, 0	-36.66	-39.7435	-26.4174	0.147722	-8.18772	-9.59239	-6.10464	-6.62699	-6.19606	-8.71578	-0.560913	-0.553988	-2.32767	-0.653668	-3.68986	0.0110795
Q00535	CDK5	Pan-specific	0, 0	0, 0	0, 0	0, 0	-19.656	-19.8797	-41.6046	-49.7759	-0.405136	-0.87952	-0.173879	-0.445829	-0.439232	-1.46669	-0.528765	-1.44811	-0.7861	-0.34032	-1.5046	-1.47097
Q00535	CDK5	Pan-specific	0, 0	0, 0	1, 0	0, 0	-34.8611	7.74204	-32.5175	-24.6258	0.152007	-0.503245	-0.119705	-0.102221	0.0609829	-0.458735	-0.500655	-0.771417	-1.08582	0.0218794	-0.761071	-0.433226
Q00535	CDK5	Pan-specific	4, 4	4, 4	2, 2	0, 0	-36.66	-39.7435	-98.8133	6.03806	-8.18772	-9.59239	-6.10464	-6.62699	-3.77732	-8.71578	-0.442132	-0.445781	-2.32767	-0.653668	-7.23186	-0.00583841
Q00535	CDK5	Pan-specific	4, 4	4, 4	4, 4	0, 0	-36.66	-39.7435	-26.4174	6.71517	-8.18772	-9.59239	-6.10464	-6.62699	-6.19606	-8.71578	-0.918424	-0.83354	-2.32767	-0.653668	-3.68986	0.135817
Q00534	CDK6	Pan-specific	0, 0	0, 0	0, 0	0, 0	6.22986	-8.97307	60.0459	-44.2606	0.915144	0.983983	0.563852	0.427375	0.554681	1.20787	0.418687	-0.216618	0.114073	-0.170788	0.956533	-1.0165
Q00534	CDK6	Pan-specific	0, 0	0, 0	0, 0	0, 0	-37.5468	-6.55519	-25.7751	-48.7846	-0.201859	-0.914298	-0.311038	-0.436407	-0.41199	-1.07506	-0.454735	-1.32398	-1.18058	-0.156888	-0.97099	-1.39082
Q00534	CDK6	Pan-specific	4, 4	2, 4	1, 2	0, 0	-36.66	-39.7435	-26.4174	50.5675	-8.18772	-9.59239	-6.10464	-6.62699	-6.19606	-8.71578	-0.815944	-0.27801	-2.32767	-0.653668	-3.68986	0.860706
P50613	CDK7	Pan-specific	0, 0	0, 0	0, 2	0, 0	-51.2486	176.955	8.70136	-42.8159	-0.834362	-2.15634	-1.81733	-0.747623	-1.23576	-1.44288	-0.966683	-1.77208	-2.19065	1.33865	-0.303306	-1.28865
P50613	CDK7	Pan-specific	4, 4	4, 4	2, 4	0, 0	-36.66	-39.7435	-26.4174	-12.6565	-8.18772	-9.59239	-6.10464	-6.62699	-6.19606	-6.28407	-0.731613	-0.923069	-2.32767	-0.653668	-0.128869	-0.306335
P50613	CDK7	Pan-specific	0, 0	0, 0	0, 0	0, 0	-26.2505	4.1359	-34.5543	-39.0129	-0.31481	-0.840492	-0.481448	-0.431997	-0.667314	-1.42143	-0.469488	-1.02108	-0.871105	0.0618833	-1.10432	-0.882566
P49336	CDK8	Pan-specific	0, 0	0, 0	0, 0	0, 0	-25.8444	-21.2952	-34.2575	-39.6645	-0.0732735	-0.604487	0.00921238	-0.249784	-0.215138	-0.967991	-0.200421	-0.832037	-0.880272	-0.32411	-1.10247	-1.0106
P49336	CDK8	Pan-specific	0, 0	0, 0	0, 1	0, 0	-24.3114	26.2558	15.0426	-16.0291	-0.291338	-0.766106	-0.520311	-0.309839	-0.573874	-0.589655	-0.859826	-1.03497	-0.786737	0.263386	-0.0231108	-0.280235
P49336	CDK8	Pan-specific	4, 4	4, 4	2, 4	0, 0	-36.66	-39.7435	-26.4174	17.7336	-8.18772	-9.59239	-6.10464	-6.62699	-6.19606	-8.71578	-0.632	-0.504453	-2.32767	-0.653668	-3.68986	0.204079
P49336	CDK8	Pan-specific	0, 0	0, 0	0, 0	0, 0	-37.9261	17.5458	-19.421	-22.4161	-0.535013	-1.3964	-0.480204	-0.359592	-0.786288	-1.31908	-0.603248	-0.982431	-1.42741	0.150936	-0.780213	-0.6067
P50750	CDK9	Pan-specific	4, 4	4, 4	4, 4	0, 0	-36.66	-39.7435	-26.4174	-4.01331	-8.18772	-9.59239	-6.10464	-6.62699	-6.19606	-8.71578	-0.461678	-0.478873	-2.32767	-0.653668	-3.68986	-0.0275126
Q00532	CDKL1	Pan-specific	0, 0	2, 2	2, 2	2, 2	-9.22478	52.3885	-28.4779	-47.1637	-1.18925	-1.57246	-1.25545	-0.990209	-1.27842	-2.29436	-1.70284	-3.16273	-0.635022	0.331923	-1.48773	-2.33586
O14757	Chk1	Pan-specific	4, 4	4, 4	2, 2	0, 0	-36.66	-39.7435	2344.35	38.4318	-8.18772	-9.59239	-6.10464	-6.62699	-6.19606	-6.07177	-0.37429	-0.000244901	-2.32767	-0.653668	0.182011	0.59848
O14757	Chk1	Pan-specific	4, 4	4, 4	4, 4	0, 0	-36.66	-39.7435	-26.4174	42.3306	-8.18772	-9.59239	-6.10464	-6.62699	-6.19606	-8.71578	-1.03313	-0.627804	-2.32767	-0.653668	-3.68986	0.648529
O96017	Chk2	Pan-specific	4, 4	4, 4	4, 4	0, 0	-36.66	-39.7435	-26.4174	27.251	-8.18772	-9.59239	-6.10464	-6.62699	-6.19606	-8.71578	-0.797606	-0.696911	-2.32767	-0.653668	-3.68986	0.161115
O96017	Chk2	T68	0, 0	0, 0	0, 0	0, 0	6.46137	-31.7578	-39.2625	-40.8139	-0.193262	-0.220773	0.179586	-0.221485	-0.134552	-0.971621	0.338468	-0.256774	-0.0455878	-0.501905	-1.2258	-0.952401
Q13490	c-IAP1	Pan-specific	4, 4	4, 4	4, 4	0, 0	-36.66	-39.7435	-26.4174	-1.09637	-8.18772	-9.59239	-6.10464	-6.62699	-6.19606	-8.71578	-0.969438	-1.15268	-2.32767	-0.653668	-3.68986	-0.29319
P48730	CK1d	Pan-specific	4, 4	4, 4	4, 2	1, 0	-36.66	-39.7435	-26.4174	-3.34129	-8.18772	-9.59239	-6.10464	-6.62699	-6.19606	-8.71578	-0.478846	-0.590369	-2.32767	-0.653668	-3.68986	-0.178439
P49674	CK1e	Pan-specific	0, 0	0, 0	0, 0	0, 0	5.36535	17.3373	-0.170538	-3.04336	1.00226	1.1159	0.931918	1.07507	0.783191	0.947118	1.19861	1.25435	0.188303	0.179143	0.240054	0.0891823
Q8IXA3	CK1g	Pan-specific	0, 0	0, 0	2, 2	0, 2	-4.356	51.6449	10.5545	-20.7851	-1.30501	-1.37187	-1.29332	-0.850974	-1.36702	-1.5721	-1.34702	-1.89973	-0.110787	0.553553	-0.300326	-0.884349
P78368	CK1g2	Pan-specific	0, 0	0, 0	0, 0	0, 0	-3.07259	12.6132	-16.7351	-22.1516	-0.776772	-0.826774	-0.543935	-0.461531	-0.761752	-1.25128	-0.734895	-1.15227	-0.0828572	0.103121	-0.716866	-0.667813
P68400	CK2a	Pan-specific	0, 0	0, 0	2, 0	0, 0	-8.44048	14.519	6.64464	-21.1361	-1.37917	-1.5289	-0.891752	-0.891552	-1.2933	-1.7661	-1.25997	-1.76132	-0.248116	0.000250925	-0.692363	-0.802159
P01106	c-Myc	T58/S62	0, 0	0, 0	3, 0	0, 0	-28.9278	-3.67719	-39.9919	-49.1022	-0.573228	-1.1688	-0.594983	-0.684674	-0.44119	-1.48526	-1.0137	-1.90079	-0.986926	-0.112241	-1.52893	-1.41936
P23528	Cofilin 1	Pan-specific	0, 1	0, 0	0, 0	0, 0	29.451	14.4225	-9.24676	4.97747	1.00841	1.3791	0.98492	1.11191	0.832653	0.890733	1.27807	1.43491	0.614264	0.158914	0.0850513	0.250941
P23528	Cofilin 1	S3	0, 0	0, 0	0, 0	0, 0	30.5396	4.63573	-21.945	-43.4357	0.633254	0.953601	0.571241	0.556236	0.50675	0.24141	0.736428	0.117057	0.530846	-0.0187763	-0.388562	-0.991007
Q9Y281	Cofilin 2	S3	0, 0	0, 0	0, 0	0, 0	-9.33045	14.7368	-34.1558	-18.6039	-0.163287	-0.398284	-0.187592	-0.148127	0.0104522	-0.70219	-0.366744	-0.66118	-0.389412	0.0493862	-1.04359	-0.471104
Q60598	Cortactin	Y466	0, 0	0, 0	0, 0	0, 0	-3.38221	-15.7376	-29.3343	-50.576	1.37911	1.352	1.40276	1.15107	1.24324	1.05173	1.6286	0.930335	-0.0449268	-0.314955	-0.28044	-1.11724
P41279	COT	Pan-specific	0, 0	0, 2	2, 2	0, 2	-32.0105	-1.0041	-4.08001	-58.4249	-0.7011	-1.37544	-0.829052	-0.890987	-1.15688	-1.75978	-1.24933	-2.30239	-1.11745	-0.0775062	-0.882888	-1.68492
P41279	COT	Pan-specific	0, 0	0, 0	0, 0	0, 0	-2.55195	38.2256	14.9071	-8.26484	-0.301538	-0.403356	-0.480844	-0.132178	-0.46569	-0.650991	-0.70188	-0.846979	-0.168723	0.436323	-0.271353	-0.232162
P35354	COX2	Pan-specific	0, 1	0, 0	0, 0	0, 0	26.1669	11.4425	-13.8259	-10.155	0.800544	1.1514	0.892806	0.960958	0.758086	0.716251	1.28218	1.24424	0.581401	0.0852866	-0.0612633	-0.0607183
O15075	CPG16/CaMKinase VI	Pan-specific	0, 0	0, 0	0, 0	0, 0	22.0379	9.38123	-20.7107	-10.4956	0.849225	1.1031	0.89547	0.974437	0.813388	0.654491	1.26709	1.21809	0.420689	0.0988201	-0.232688	-0.0784074
P16220	CREB1	S129+S133	0, 0	0, 0	0, 0	0, 0	15.0318	6.83247	-6.10982	-23.3584	0.873232	1.03156	1.0202	1.03481	0.917726	1.01769	1.26422	1.03659	0.262366	0.0182889	0.146392	-0.364215
P16220	CREB1	S133	0, 0	0, 0	0, 0	0, 0	-10.051	-0.46065	3.1122	-37.8214	0.400402	0.222304	0.295502	0.251372	0.0515106	0.0444397	0.154826	-0.425114	-0.295127	-0.0552243	-0.0103546	-0.927918
P16220	CREB1	S133	0, 0	2, 2	2, 2	2, 2	16.986	266.785	45.5245	-58.7645	-1.82434	-1.60908	-3.87603	-1.23534	-1.99739	-2.17334	-2.16313	-4.25353	0.356707	3.30459	-0.257662	-3.34468
P02511	Crystallin aB	Pan-specific	0, 0	0, 0	0, 0	0, 0	54.3362	-31.8755	10.805	5.98172	0.0555343	0.59911	-0.128977	-0.509024	-0.607525	-0.60295	0.721524	0.843485	0.900758	-0.475595	0.00669948	0.19514
P02511	Crystallin aB	Pan-specific	0, 0	0, 0	3, 0	0, 3	-10.0911	12.1793	-22.7719	-43.4319	-0.490741	-0.691238	-0.570081	-0.458672	-0.527545	-1.05224	-0.706332	-1.51644	-0.332243	0.139417	-0.768358	-1.29619
P02511	Crystallin aB	Pan-specific	0, 0	0, 0	0, 0	0, 0	-9.49729	4.58074	4.42471	-46.5374	-0.456891	-0.741182	-0.384538	-0.412272	-0.455043	-0.55953	-0.558951	-1.33279	-0.471098	-0.0347074	-0.15301	-1.23817
P02511	Crystallin aB	Pan-specific	0, 0	0, 0	0, 0	0, 0	2.29191	48.5764	41.61	45.4891	0.918885	0.979394	0.705025	1.06022	0.454617	1.03726	1.602	2.13328	0.10027	0.444489	0.853217	0.850055
P02511	Crystallin aB	S19	0, 0	0, 0	0, 0	0, 0	-4.10604	15.7231	-0.232875	-17.4664	0.892562	0.864145	0.82364	0.951219	0.608203	0.733647	1.1642	1.01808	-0.0470901	0.159654	0.183699	-0.233793
P02511	Crystallin aB	S45	0, 0	0, 0	0, 0	0, 0	28.3391	3.58785	-10.9214	-35.2565	0.758677	1.08943	0.943889	0.940493	0.67077	0.705879	1.18819	0.768572	0.548085	-0.00425076	0.0514132	-0.671404
P41240	Csk	Pan-specific	0, 0	0, 0	0, 0	0, 0	27.1308	13.2424	-6.37862	-5.31502	0.823615	1.17845	0.803	0.897586	0.744198	0.833876	1.29437	1.31533	0.587993	0.118365	0.131325	0.0335363
P41240	Csk	Pan-specific	4, 4	4, 4	2, 2	0, 0	-36.66	-39.7435	-26.4174	3.42881	-8.18772	-9.59239	-6.10464	-6.62699	-6.19606	-8.71578	-0.300713	-0.2854	-2.32767	-0.653668	-3.68986	0.0245012
P78396	Cyclin A	Pan-specific	0, 0	0, 0	0, 0	0, 0	-17.5271	-18.3578	26.518	0.122889	1.30121	0.999295	1.2441	0.99642	1.02954	1.58621	1.61468	1.70305	-0.500304	-0.309955	0.815182	0.141394
P14635	Cyclin B1	Pan-specific	4, 4	4, 4	4, 4	0, 0	-36.66	-39.7435	-26.4174	-43.9243	-8.18772	-9.59239	-6.10464	-6.62699	-6.19606	-8.71578	-0.290336	-0.889125	-2.32767	-0.653668	-3.68986	-0.958075
P24385	Cyclin D1	Pan-specific	0, 0	0, 0	0, 0	0, 0	-14.9028	-67.651	-46.3121	-34.7575	0.917772	0.607611	0.860265	-0.270567	0.745124	0.0734337	0.837324	0.389584	-0.513965	-1.41513	-0.983619	-0.716393
P24385	Cyclin D1	Pan-specific	0, 0	2, 0	2, 2	2, 1	-23.3823	15.1677	-43.1499	-9.71474	-0.854271	-1.44664	-1.1827	-1.06491	-1.20132	-2.4612	-1.71344	-3.35904	-0.981609	0.1474	-1.84496	-2.633
P24864	Cyclin E	Pan-specific	4, 4	4, 4	2, 2	0, 0	-36.66	-39.7435	-26.4174	-23.0916	-8.18772	-9.59239	-6.10464	-6.62699	-6.19606	-8.71578	-0.48111	-0.870448	-2.32767	-0.653668	-3.68986	-0.622949
P51959	Cyclin G1	Pan-specific	4, 4	4, 4	4, 4	2, 0	-36.66	-39.7435	-26.4174	-55.3023	-8.18772	-9.59239	-6.10464	-6.62699	-6.19606	-8.71578	-1.4423	-2.00161	-2.32767	-0.653668	-3.68986	-0.894908
P99999	CytoC	Pan-specific	4, 4	4, 4	4, 4	0, 0	-36.66	-39.7435	-26.4174	-35.0919	-8.18772	-9.59239	-6.10464	-6.62699	-6.19606	-8.71578	-0.76693	-1.26779	-2.32767	-0.653668	-3.68986	-0.801384
O75553	Dab1	Y198	0, 0	0, 0	0, 0	0, 0	-26	-1.7073	-18.8776	-4.74014	1.27792	0.836854	1.09142	1.01523	0.794871	0.685465	1.06153	1.06221	-0.730883	-0.0953507	-0.160213	0.00109674
P53355	DAPK1	Pan-specific	0, 0	0, 0	0, 3	3, 0	-27.0474	-35.3926	-36.5892	-40.3985	-0.615006	-1.27555	-0.493597	-1.1943	-0.7578	-1.75889	-0.956873	-1.54271	-1.09459	-0.876865	-1.46599	-0.937353
Q9UIK4	DAPK2	Pan-specific	0, 0	0, 0	0, 0	0, 0	-28.9798	-30.2132	-39.682	-37.0824	0.178062	-0.350272	0.233334	-0.0162663	-0.0302145	-0.732315	-0.111675	-0.688181	-0.8755	-0.312353	-1.02815	-0.922422
Q9UER7	DAXX	Pan-specific	0, 0	0, 0	0, 0	0, 0	-48.8857	-63.6637	-70.459	-76.7474	0.663585	-0.326797	0.898383	-0.171733	0.788853	-0.695306	1.05911	-0.552039	-1.64116	-1.33915	-2.17339	-2.57788
O00273	DFF35, DFF45	Pan-specific	0, 0	0, 0	0, 0	0, 0	-29.3683	-47.1643	-53.2003	-52.6334	-0.242701	-0.775235	-0.367948	-1.05295	-0.558063	-1.8925	-0.684221	-2.23926	-0.882461	-0.857213	-1.95414	-2.48809
Q13574	DGKz	Pan-specific	0, 0	0, 0	0, 0	0, 0	-30.1446	-41.6585	-34.7848	-64.5658	0.565777	0.00731039	0.255395	-0.370883	0.107561	-0.554816	0.434006	-0.821846	-0.925434	-0.78373	-0.96998	-2.00939
P78527	DNAPK	Pan-specific	0, 0	0, 0	0, 0	0, 0	-35.5258	-39.7468	-42.7322	-53.4283	-0.473192	-1.22541	-0.262761	-1.0262	-0.427196	-1.54877	-0.691503	-1.55262	-1.2465	-0.955375	-1.64242	-1.3778
P78527	DNAPK	Pan-specific	0, 0	0, 0	0, 0	0, 0	-24.7015	-60.325	-75.3388	-67.8986	0.246786	-0.198989	0.754545	-0.138635	1.16589	-0.444073	1.19812	-0.0344732	-0.738693	-1.11773	-2.35762	-1.97217
O60496	Dok2	Y139	0, 0	0, 0	0, 0	0, 0	-13.7091	-9.9461	-42.2585	-55.1526	1.46351	1.30722	1.17963	1.04712	1.23729	0.796632	1.38946	0.591625	-0.258988	-0.165816	-0.645298	-1.27655
O60496	Dok2	Y139	0, 0	0, 0	0, 0	0, 0	-16.0186	-31.2893	-31.3367	-48.2821	1.535	1.37016	1.35906	0.913782	1.12896	0.893467	1.57102	0.885225	-0.273152	-0.557226	-0.344861	-1.09729
O94768	DRAK2	Pan-specific	0, 0	3, 0	0, 0	0, 0	-17.7943	-40.2009	-40.2496	-51.4992	-0.28969	-0.695005	-0.277432	-0.853338	-0.59232	-1.53656	-0.767647	-1.74581	-0.671646	-0.720693	-1.38273	-1.56508
O00418	eEF2K	Pan-specific	0, 0	0, 0	0, 0	0, 0	-11.7336	-16.4778	-17.3368	-52.3472	0.313462	0.0748853	-0.118959	-0.461742	-0.201178	-0.63482	-0.34901	-1.24083	-0.395344	-0.428962	-0.635022	-1.42693
P00533	EGFR	Pan-specific	0, 0	0, 0	0, 0	0, 0	-11.9502	-94.0417	-38.5986	-46.7737	0.46828	0.247711	0.580726	-2.60765	0.536164	-0.00963515	1.05372	0.361893	-0.365505	-3.98996	-0.799265	-1.10693
P00533	EGFR	Y1092	0, 0	0, 0	0, 0	0, 0	-10.0069	19.3111	-11.6165	-28.5159	0.0615026	-0.12383	0.305733	0.452886	-0.145342	-0.418898	0.378766	-0.00499545	-0.307115	0.184149	-0.400593	-0.614027
P00533	EGFR	Y1172	0, 0	0, 0	0, 0	0, 0	-13.4837	28.18	-31.3369	-61.0532	0.138244	-0.0418614	0.128716	0.356451	-0.167456	-0.748816	0.759068	-0.239031	-0.298452	0.284991	-0.85134	-1.59698
P00533	EGFR	Y1172	0, 0	0, 0	0, 0	0, 0	-26.4391	57.6815	-6.69668	-23.6177	0.00204256	-0.496096	0.0261929	0.444806	-0.0959863	-0.264782	0.213613	-0.0750356	-0.825465	0.523856	-0.247183	-0.461844
P00533	EGFR	Y1197	0, 0	0, 2	0, 2	2, 2	11.26	-0.73012	4.14854	-53.8003	-0.772987	-0.810061	-0.930012	-1.11551	-1.28077	-1.82607	-1.57119	-2.57821	-0.0614363	-0.232131	-0.798535	-1.61125
P00533	EGFR	T693	0, 0	0, 0	0, 0	0, 0	-12.5907	48.7085	2.51267	-53.3622	0.0488089	-0.195656	-0.0717828	0.334045	-0.326846	-0.398767	0.115774	-0.755623	-0.405102	0.507857	-0.10532	-1.39425
P05198	eIF2a	S52	0, 0	0, 0	0, 0	0, 0	-15.9784	8.986	-19.1874	-39.1181	1.19022	0.981278	0.801579	0.850092	0.727105	0.582784	0.674095	0.133055	-0.346235	0.0607088	-0.211343	-0.865676
P05198	eIF2a	S52	0, 0	0, 0	0, 0	0, 0	-19.9586	-9.5233	-20.7999	-51.9483	1.10381	0.827773	0.734936	0.595332	0.609449	0.404625	1.22528	0.41155	-0.457424	-0.174701	-0.299944	-1.30199
P06730	eIF4E	Pan-specific	0, 0	0, 0	0, 0	0, 0	-47.0754	-29.4389	-35.3572	-23.5562	1.40405	0.553899	1.0992	0.698295	0.949561	0.561145	1.55853	1.3524	-1.40879	-0.501698	-0.568795	-0.329815
P06730	eIF4E	S209	0, 0	0, 0	0, 0	0, 0	-23.561	-68.3904	-53.8262	-61.9935	1.46048	1.13203	1.16972	-0.183765	0.883006	-0.0447107	1.44089	0.350971	-0.54428	-1.69376	-1.35854	-1.74389
P06730	eIF4E	S209	0, 0	0, 0	0, 0	0, 0	-10.7845	-39.8419	-37.7433	-40.342	0.950686	0.831444	0.971243	0.405604	0.770442	0.310901	1.2494	0.71254	-0.197595	-0.707846	-0.67295	-0.85898
Q04637	eIF4G	S1107	0, 0	0, 0	3, 0	0, 0	-14.3316	-0.466082	2.78509	-14.7571	0.408241	0.17347	-0.226349	-0.264004	-0.293195	-0.267233	0.255835	0.0332526	-0.389039	-0.0471223	0.038018	-0.356137
P21709	EphA1	Pan-specific	0, 0	0, 0	0, 0	0, 0	-42.4367	-42.4721	-51.8156	-75.2025	0.017275	-0.766734	0.0933692	-0.513012	-0.0113412	-1.13531	0.542674	-1.16616	-1.29918	-0.758831	-1.64593	-2.73417
P04626	ErbB2 (HER2)	Pan-specific	0, 0	0, 0	0, 0	0, 0	-46.3676	-46.7269	-54.9521	-66.5534	-0.511184	-1.40616	-0.305745	-1.02355	-0.425486	-1.77468	-0.460131	-1.93778	-1.48306	-0.898272	-1.97575	-2.36427
P04626	ErbB2 (HER2)	Pan-specific	2, 2	4, 4	2, 2	0, 0	-36.66	-39.7435	-26.4174	-19.4054	-8.18772	-9.59239	-6.10464	-6.62699	-6.19606	-8.71578	0.410612	0.201146	-2.32767	-0.653668	-3.68986	-0.33515
P04626	ErbB2 (HER2)	Y1248	0, 0	0, 0	3, 0	0, 0	29.0319	40.2618	24.7865	-2.82512	0.152808	0.45744	-0.617363	-0.264533	-0.504363	-0.503946	-0.311881	-0.320724	0.504804	0.441535	0.000609515	-0.0141487
P04626	ErbB2 (HER2)	Y1248	0, 0	2, 2	2, 2	2, 2	-4.08378	-24.678	-2.2925	-65.7515	-1.08418	-1.36617	-0.879354	-1.31416	-1.11739	-1.85054	-1.62896	-4.20505	-0.467273	-0.544124	-1.07362	-4.1218
P04626	ErbB2 (HER2)	T686	0, 3	0, 0	0, 0	0, 0	-21.4735	1669.55	42.1329	30.367	-0.807237	-1.39288	-0.213418	2.67441	-0.405331	-0.202881	0.512338	0.855057	-0.970462	3.61385	0.296467	0.548358
P04626	ErbB2 (HER2)	Y1112	0, 0	0, 0	0, 0	0, 0	-9.20702	40.7426	40.3017	25.1622	1.56096	1.49628	1.29444	1.574	1.20132	1.95083	1.90631	2.31689	-0.107193	0.349846	1.09757	0.656929
P27361	Erk1/2	Pan-specific	0, 0	0, 0	0, 0	0, 0	-45.8725	-46.5723	-49.7298	-58.3036	-0.0861453	-1.10596	-0.352459	-1.18262	-0.378125	-1.74196	-0.642376	-1.7653	-1.68993	-1.03887	-1.9972	-1.7967
P27361	Erk1/2	Pan-specific	0, 0	0, 0	0, 0	0, 0	-3.37189	508.614	31.8972	137.932	1.41069	1.41701	1.09227	2.88227	1.01348	1.61855	1.88752	3.02573	0.0104807	2.24002	0.886061	1.82116
P27361	Erk1/2	Pan-specific	0, 0	0, 0	0, 0	0, 0	-19.5371	-18.14	-34.6318	-43.9237	-0.864827	-1.324	-0.512212	-0.748047	-0.519817	-1.40252	-0.633623	-1.56131	-0.760891	-0.295126	-1.29263	-1.48432
P27361	Erk1/2	Pan-specific	0, 0	0, 0	0, 0	0, 0	-32.1537	-16.1161	-19.8515	-50.2285	0.331678	-0.22855	0.109639	-0.0980222	-0.140072	-0.564574	0.111057	-0.757896	-0.928352	-0.259869	-0.621639	-1.39034
P27361	Erk1/2	Pan-specific	0, 0	0, 0	0, 0	3, 0	-6.62312	-18.5464	18.3401	-20.719	-0.251119	-0.474553	-0.117716	-0.379387	-0.514547	-0.56118	-0.667166	-0.996561	-0.370252	-0.327458	-0.0682889	-0.527038
P27361, P28482	Erk1/2	Pan-specific	0, 3	2, 2	2, 2	2, 2	4.57544	-12.7997	-33.4047	-44.148	-0.936134	-1.29767	-0.973955	-1.24613	-1.34996	-2.62305	-2.17434	-3.21263	-0.599105	-0.340606	-1.86431	-1.66129
P28482	Erk2	Pan-specific	0, 0	0, 0	0, 0	0, 0	-13.7718	30.5814	-27.5185	-51.5335	-0.76252	-1.02515	-0.753812	-0.349147	-0.688894	-1.28881	-0.498881	-1.32009	-0.435206	0.506401	-0.878513	-1.31394
P27361	Erk1/2	T202+Y204; T185/Y187	0, 0	0, 0	0, 0	0, 0	-27.9757	-12.8868	-13.7335	-58.7926	0.200911	-0.283953	0.0332623	-0.081544	0.0614814	-0.170445	0.353184	-0.744173	-0.803466	-0.14367	-0.339632	-1.75579
P27361	Erk1/2	T202+Y204; T185/Y187	0, 0	0, 0	0, 3	0, 0	-5.52302	20.5552	18.7107	3.36114	1.05339	0.969734	0.929715	1.07511	0.729313	1.13801	1.14548	1.26263	-0.138633	0.181943	0.598488	0.187439
P27361	Erk1/2	T202+Y204; T185/Y187	0, 0	0, 0	0, 0	0, 0	-12.6545	-33.8223	-31.8727	-57.5711	-0.608458	-0.870149	-0.542301	-0.949843	-0.684941	-1.4524	-0.579854	-1.58165	-0.433648	-0.510002	-1.12386	-1.60289
Q16659	Erk3	Pan-specific	4, 4	4, 4	4, 4	0, 0	-36.66	-39.7435	-26.4174	126.25	-8.18772	-9.59239	-6.10464	-6.62699	-6.19606	-8.71578	-2.33236	-1.46439	-2.32767	-0.653668	-3.68986	1.38877
Q13164	Erk4	Pan-specific	0, 0	0, 0	0, 0	0, 1	-39.2612	-33.1023	-33.0968	38.346	0.311101	-0.540679	0.208468	-0.336303	-0.070632	-1.00707	-0.314711	-0.113771	-1.41148	-0.681731	-1.37132	0.321509
Q13164	Erk5	Pan-specific	0, 0	0, 2	2, 2	2, 2	-44.0369	-56.6969	-65.0989	-57.5009	-0.330711	-1.33139	-0.444396	-1.3354	-0.629817	-2.44357	-1.33834	-2.62324	-1.65822	-1.11502	-2.65605	-2.05586
Q13164	Erk5	Pan-specific	0, 0	2, 0	2, 2	2, 2	-30.305	-41.9673	-35.371	-39.8034	-0.438229	-1.21648	-0.395444	-1.05679	-0.873675	-1.86723	-1.77822	-2.93535	-1.28963	-0.827618	-1.45495	-1.85143
Q13164	Erk5	Pan-specific	4, 4	2, 2	2, 2	0, 0	-36.66	10350.5	13805.5	393.896	-8.18772	-9.59239	-6.10464	-4.02421	-6.19606	-2.62442	-1.73868	0.140647	-2.32767	2.60347	5.2303	3.00697
Q13164	Erk5	T218+Y220	0, 0	0, 0	0, 0	0, 0	-33.6898	-33.8817	6.94271	-12.2347	1.66479	1.15492	1.46851	0.985022	1.20677	1.57211	1.18385	1.07265	-0.844889	-0.605041	0.535003	-0.177933
Q13164	Erk5	T218+Y220	0, 0	0, 0	0, 0	0, 0	-45.4779	-43.5354	-14.3849	-21.9527	1.81564	1.01755	1.57736	0.901396	1.37571	1.47712	1.04149	0.835852	-1.32251	-0.845903	0.148505	-0.329029
P30101	ERP57	Pan-specific	0, 0	2, 2	0, 2	2, 2	-50.3972	-43.4809	97.6261	-55.4144	-0.368614	-1.49059	-0.61001	-1.21459	-0.884821	-1.36976	-1.45878	-2.80258	-1.85923	-0.756575	-0.710138	-2.1501
P13667	ERP72	Pan-specific	0, 0	0, 0	0, 0	0, 0	-39.6671	-44.3618	-54.8345	-32.4614	-0.183553	-1.07292	-0.0716407	-0.718689	-0.192561	-1.5911	-0.726443	-1.32276	-1.47377	-0.809723	-2.04801	-0.954127
Q05397	FAK	Pan-specific	4, 4	2, 3	2, 2	0, 0	-36.66	29448.2	542.647	39.4572	-8.18772	-9.59239	-6.10464	-3.48558	-6.19606	-2.56096	-0.304033	0.0665876	-2.32767	3.27752	5.32322	0.593001
Q05397	FAK	Y397	0, 0	0, 0	0, 0	0, 0	-33.477	-13.838	1.3572	22.8683	1.8559	1.38175	1.52073	1.33548	1.35334	1.71534	1.73138	2.09479	-0.785715	-0.231831	0.530104	0.581452
Q05397	FAK	Y576	0, 0	0, 0	0, 0	0, 0	-41.9895	-44.694	-30.7844	-14.0545	0.479905	-0.380895	0.660833	-0.0630898	0.433251	-0.0655015	-0.0465495	-0.124246	-1.42643	-0.905923	-0.73037	-0.124317
Q05397	FAK	Y576	0, 0	0, 0	0, 0	1, 0	-28.7375	-11.8126	37.0957	62.6621	1.02217	0.576118	0.999414	0.832096	0.688575	1.2678	1.07021	1.73379	-0.739154	-0.209382	0.848207	1.06174
Q05397	FAK	S722	0, 0	0, 1	0, 0	0, 0	-35.4226	-33.9395	-36.2986	-5.67729	1.60065	1.04441	1.18172	0.713185	1.12074	0.749676	0.648022	0.572622	-0.921743	-0.586334	-0.543382	-0.120641
Q05397	FAK	S732	0, 0	0, 0	0, 0	0, 0	-18.1276	24.2703	-3.47279	34.373	0.306558	-0.0156332	0.556178	0.665409	0.36431	0.360544	0.237761	0.462467	-0.533902	0.136692	-0.00551364	0.359533
Q05397	FAK	S843	0, 0	0, 0	0, 0	0, 0	-17.9193	-34.5664	-23.972	-0.482104	0.675923	0.405515	0.843818	0.402746	0.607099	0.376008	0.211198	0.171587	-0.448093	-0.551962	-0.338409	-0.0633788
Q05397	FAK	S910	0, 0	0, 0	2, 2	2, 2	-35.4073	-33.8051	-32.5212	-26.9472	-0.336323	-1.20237	-0.267166	-0.999313	-0.53196	-1.30767	-1.61843	-1.9068	-1.43513	-0.916215	-1.13594	-0.461396
P25445	FAS	Pan-specific	4, 2	2, 2	2, 2	0, 1	-36.66	-39.7435	8547.98	307.409	-8.3298	-9.59239	-6.10464	-6.62699	-6.19606	-3.79351	-1.42645	-0.0328897	-2.09223	-0.653668	3.51829	2.22972
P48023	FasL	Pan-specific	0, 0	0, 0	0, 0	0, 0	-33.4124	-33.2945	-3.76919	-5.74956	1.74825	1.25081	1.48553	1.00016	1.32646	1.55175	1.16016	1.15755	-0.824318	-0.607393	0.329912	-0.00417662
P07332	Fes	Pan-specific	0, 0	0, 0	0, 0	0, 0	9.04494	5.76657	-20.5168	-1.82839	-0.10797	-0.063211	-0.145709	-0.132425	-0.182554	-0.702708	-0.471375	-0.529505	0.0741694	0.0166229	-0.76171	-0.0930091
P11362	FGFR1	Pan-specific	0, 0	0, 0	0, 0	0, 0	-26.95	-44.3843	-40.0392	1.08399	0.616507	0.194434	0.669962	0.0438244	0.402875	-0.174123	-0.0782067	-0.104473	-0.699418	-0.783555	-0.844952	-0.0420262
P21802	FGFR2	Pan-specific	0, 0	0, 0	0, 0	0, 0	-21.5553	-47.1998	-27.7058	-2.48313	0.393143	-0.0891493	0.505308	-0.267603	0.330124	-0.101426	-0.432058	-0.582857	-0.799205	-0.967228	-0.631959	-0.241282
Q02790	FKBP52	Pan-specific	0, 0	0, 0	0, 0	0, 1	-36.3031	-32.4238	-70.0008	159.387	-0.160793	-0.952215	-0.23999	-0.740249	-0.259935	-2.481	-1.11784	-0.554678	-1.31146	-0.626028	-3.25252	0.901067
O43524	FKHRL1	T32	0, 0	0, 0	0, 0	0, 2	-26.0043	-42.1354	-64.1062	-45.8865	-0.5657	-1.16412	-0.278462	-0.875708	-0.376309	-2.90427	-1.09595	-2.16268	-0.991635	-0.747399	-3.70193	-1.70678
P35916	FLT4	Pan-specific	0, 0	0, 0	0, 0	0, 0	-20.4295	-42.2018	-56.0321	-9.43563	0.26331	-0.0313315	0.66911	0.0793566	0.623693	-0.457462	-0.0462854	-0.147837	-0.48825	-0.738023	-1.58324	-0.162484
P01100	Fos	Pan-specific	2, 4	1, 0	2, 0	0, 0	-36.66	71.0479	9913.48	46.2543	-8.18772	-9.59239	-3.1128	-0.69219	-6.19606	-1.27363	0.166184	0.619397	-2.32767	3.02917	7.20838	0.725151
P01100	Fos	T232	0, 0	0, 0	0, 0	0, 0	-33.5051	-46.733	-13.3459	-1.81663	0.600562	-0.0225887	0.975115	0.216404	0.623978	0.519516	0.419253	0.408059	-1.03262	-0.949458	-0.152974	-0.0179107
P06241	Fyn	Pan-specific	4, 4	2, 2	0, 0	0, 0	-36.66	159.264	-31.4117	63.7055	-8.18772	-9.59239	-5.14034	-2.91417	-0.813565	-1.31564	-0.30109	0.31926	-2.32767	2.78585	-0.735229	0.992573
P17677	GAP-43	S41	0, 0	0, 0	0, 0	0, 0	-43.2471	-21.5353	16.5726	-39.9045	0.750259	-0.0444697	0.459588	0.138671	0.537802	0.754532	0.329714	-0.25511	-1.31694	-0.401598	0.317378	-0.935731
Q12851	GCK	Pan-specific	2, 2	2, 2	0, 2	0, 0	2677.37	5467.68	38745.7	137.951	-8.18772	-7.34754	-6.10464	-4.33193	-6.19606	-1.11206	-0.746102	0.304724	1.39226	2.21839	7.44498	1.68134
P14136	GFAP	S8	0, 0	0, 0	0, 0	0, 0	-33.4492	168.492	-52.3145	-63.1872	-0.480363	-1.12654	-0.660312	0.00321112	-0.441831	-1.59888	-0.728443	-2.05329	-1.07077	0.830339	-1.69438	-2.11979
P63244	GNB2L1	Pan-specific	0, 0	0, 0	0, 0	0, 0	-34.0935	-43.8081	-34.5089	-12.9454	-0.0425413	-0.763401	0.158165	-0.57716	-0.000693766	-0.731985	-0.763534	-1.04187	-1.19454	-0.920193	-1.0709	-0.445349
P25098	GRK2 (BARK1)	Pan-specific	4, 4	2, 2	2, 2	0, 0	-36.66	-39.7435	16445.4	136.506	-8.18772	-9.59239	-6.10464	-6.62699	-6.19606	-2.48322	-1.08954	-0.0538814	-2.32767	-0.653668	5.43707	1.65707
P25098	GRK2 (BARK1)	S670	0, 0	0, 0	0, 0	1, 0	-43.8287	-33.2027	-34.9807	-9.99897	2.19226	1.49188	1.52091	1.05041	1.60561	1.43945	1.34825	1.30916	-1.1606	-0.588792	-0.243319	-0.0625498
P35626	GRK3 (BARK2)	Pan-specific	0, 0	0, 0	0, 0	0, 0	-20.4322	-26.0119	-48.9434	-14.7557	-0.245463	-0.645205	-0.0176439	-0.35197	-0.0291106	-1.14629	-0.601248	-0.829804	-0.662413	-0.418379	-1.63599	-0.365694
P10809	GroEL	Pan-specific	0, 0	0, 0	0, 3	0, 0	-47.4143	-34.5344	-44.6717	-40.6939	0.148532	-0.709689	0.324561	-0.0872602	0.434889	-0.287506	0.038008	-0.605432	-1.42216	-0.515356	-1.05787	-1.02952
P38646	Grp75	Pan-specific	0, 0	0, 0	0, 0	0, 0	-33.0447	-40.9979	13.1915	128.271	1.03914	0.451933	0.973445	0.360298	0.905227	1.27067	0.249723	1.20453	-0.973061	-0.767299	0.535155	1.52771
P11021	Grp78	Pan-specific	0, 0	0, 0	0, 0	0, 0	-3.40687	-30.5321	50.8821	32.2086	1.23992	1.22873	1.08638	0.656693	0.770229	1.46448	1.35176	1.77341	-0.0185492	-0.53771	1.01666	0.674652
P11021	Grp78	Pan-specific	0, 0	0, 0	0, 0	1, 0	-35.1519	-19.7326	27.9714	79.1281	1.48583	0.932734	1.20748	0.945432	1.01644	1.56957	1.47896	2.28619	-0.916527	-0.327927	0.810002	1.29159
P14625	Grp94	Pan-specific	0, 0	0, 0	0, 0	0, 0	-18.1109	-26.8795	-30.6282	-19.2995	-0.631351	-1.00245	-0.400843	-0.683898	-0.501478	-1.3187	-1.03517	-1.31745	-0.614945	-0.354217	-1.19673	-0.451652
P14625	Grp94	Pan-specific	0, 0	0, 0	0, 3	0, 0	-21.629	24.1181	40.3073	32.8393	1.26977	1.01992	1.10016	1.27457	0.837852	1.56368	1.50545	1.94338	-0.414019	0.218262	1.06289	0.700703
P49840,P49841	GSK3ab	Pan-specific	0, 0	0, 0	0, 0	0, 0	-72.1759	-59.2596	-53.4067	-62.3893	0.91697	-0.960523	0.105163	-0.976518	-0.127572	-1.40884	-0.644942	-1.82283	-3.11119	-1.35363	-1.87628	-1.88465
P49840,P49841	GSK3ab	Pan-specific	0, 0	0, 0	0, 0	0, 0	-20.8815	-25.0199	-35.5001	-24.0819	0.0372286	-0.400892	0.160759	-0.196115	0.121769	-0.572966	-0.44017	-0.756353	-0.726009	-0.446595	-1.01737	-0.5059
P49840,P49841	GSK3ab	S21/S9	0, 0	0, 0	2, 2	2, 1	-2.01539	-32.1101	-33.7544	871.675	-0.694553	-0.926615	-0.624042	-0.956759	-0.879372	-2.12016	-3.23381	-0.646604	-0.384549	-0.416365	-1.817	4.13959
P49840,P49841	GSK3ab	Y279/ Y216	0, 0	0, 0	0, 0	0, 0	-42.4306	-54.5403	-16.2209	-39.9043	0.350518	-0.464941	0.634687	-0.235246	0.345365	0.0730094	0.0897764	-0.483664	-1.3513	-1.08864	-0.398836	-0.917517
P49840,P49841	GSK3ab	Pan-specific	0, 0	0, 0	0, 3	0, 0	-16.2204	15.587	3.57486	29.569	1.41153	1.23965	1.23057	1.32965	1.07092	1.39631	1.67905	2.10007	-0.284834	0.123994	0.476501	0.673633
P49840,P49841	GSK3ab	Pan-specific	0, 0	0, 0	0, 0	0, 2	-54.065	-39.3469	-43.0597	-18.06	-0.0373748	-1.28893	-0.313099	-1.12126	-0.206734	-1.27665	-1.23334	-1.63602	-2.07395	-1.01134	-1.56677	-0.644298
P49840,P49841	GSK3ab	Pan-specific	0, 0	0, 0	0, 0	0, 0	-33.0715	-45.1132	-57.1198	-34.9205	-0.211924	-0.871647	-0.0632214	-0.716255	-0.120237	-1.41478	-0.616454	-1.17217	-1.09322	-0.817212	-1.89572	-0.889154
Q8TF76	Haspin	Pan-specific	0, 0	0, 0	0, 0	0, 1	1.68382	-20.5599	-31.892	171.032	-0.358414	-0.42741	-0.241517	-0.548509	-0.304127	-1.02796	-0.91816	-0.0139687	-0.114333	-0.384172	-1.05997	1.44673
P54727	hHR23B	Pan-specific	0, 0	0, 0	0, 0	0, 0	-28.4476	-31.7069	-12.9501	-4.69112	1.54057	1.10445	1.25338	0.799246	1.0461	1.07403	1.11782	1.12641	-0.722687	-0.568303	0.040902	0.0137322
P50502	Hip	Pan-specific	0, 0	0, 0	0, 0	0, 0	-23.9574	53.6496	5.3928	26.0204	1.26794	0.951138	0.916287	1.29532	0.892336	1.19156	1.48835	1.85953	-0.524972	0.474326	0.438186	0.593898
Q02539	Histone H1	phospho CDK1 sites	0, 0	0, 0	0, 0	0, 0	-19.3314	-3.43419	-28.0487	-32.1496	-0.0858336	-0.669067	-0.157432	-0.391242	-0.100722	-0.806803	-0.558007	-1.12105	-0.966474	-0.292593	-1.03398	-0.900879
P16104	Histone H2A.X	S140	0, 0	0, 0	0, 0	0, 0	-33.4113	-12.4143	-19.1052	-30.5451	-0.0869025	-0.788808	-0.116472	-0.314038	-0.331298	-0.861774	-0.68773	-1.34883	-1.16313	-0.247236	-0.776827	-1.05778
P33778	Histone H2B	S15	0, 0	1, 0	3, 3	0, 0	-6.18325	15.3763	-0.755164	48.4189	0.252309	0.0145074	0.175679	0.207513	-0.0134778	-0.179214	0.979272	1.51019	-0.394061	0.0398372	-0.242704	0.849473
P84243	Histone H3	S11	0, 0	0, 0	0, 0	0, 0	-1.56401	6.79105	-14.6372	-14.7417	-0.53871	-0.843728	-0.429796	-0.443959	-0.560876	-1.1	-0.682033	-0.941909	-0.505445	-0.0177237	-0.789484	-0.415808
P84243	Histone H3	S29	0, 0	0, 3	0, 0	0, 0	5.03551	41.066	-6.4183	19.915	0.58582	0.620412	0.571205	0.874403	0.674295	0.728508	1.4682	1.78259	0.057322	0.379425	0.079389	0.503026
P84243	Histone H3	T12	0, 0	0, 0	0, 0	0, 0	-35.1401	-42.5833	-60.1129	-39.2559	-0.0248147	-0.839574	0.334934	-0.300983	0.492506	-0.770974	-0.18895	-0.86923	-1.35014	-0.795792	-1.85023	-1.08846
P84243	Histone H3	T4	0, 0	0, 0	0, 3	0, 0	18.4152	59.3307	32.3277	43.4913	0.550634	0.725614	0.204063	0.668126	0.377628	0.774804	1.10401	1.59821	0.289959	0.580733	0.581623	0.790729
P84243	Histone H3	T4	0, 0	0, 0	0, 0	0, 0	-23.8026	15.0615	-32.1664	-20.7205	0.324819	-0.120353	0.207331	0.3025	0.176431	-0.464958	-0.212835	-0.578309	-0.737693	0.119096	-0.939246	-0.584767
P09601	HO1	Pan-specific	0, 0	0, 0	0, 3	0, 0	23.3976	82.2632	75.2091	62.0935	0.294889	0.525208	0.0112373	0.589687	0.089827	0.755333	0.923881	1.56086	0.381661	0.723877	0.974564	1.01918
P09601	HO1	Pan-specific	0, 0	0, 0	0, 0	0, 0	-2.06001	80.3105	-6.72688	12.8317	-0.670457	-0.802478	-0.474201	0.157972	0.0106302	-0.0960984	0.00231347	0.150758	-0.218771	0.791107	-0.156293	0.237514
P30519	HO2	Pan-specific	0, 0	0, 0	0, 0	0, 0	3.93579	6.07636	29.1679	66.8239	0.864725	0.885881	0.73721	0.718019	0.605817	1.03269	1.12726	1.80423	0.0350574	-0.024015	0.625103	1.08318
Q92918	Hpk1	Pan-specific	2, 4	4, 4	2, 4	0, 0	-36.66	-39.7435	-26.4174	70.5882	-8.18772	-9.59239	-6.10464	-6.62699	-6.19606	-8.71578	-0.702144	-0.124571	-2.32767	-0.653668	-3.68986	0.924129
P11142	Hsc70	Pan-specific	4, 4	4, 4	4, 4	0, 0	-36.66	-39.7435	-26.4174	108.796	-8.18772	-9.59239	-6.10464	-6.62699	-6.19606	-8.71578	-1.13602	-0.353653	-2.32767	-0.653668	-3.68986	1.25181
P11142	Hsc70	Pan-specific	0, 0	0, 0	0, 0	0, 0	10.3088	30.6587	-10.3289	28.2151	1.20238	1.35886	1.15469	1.37362	1.12872	1.28382	1.67143	2.085	0.259301	0.27397	0.227141	0.661726
P11142	Hsc70	Pan-specific	0, 0	0, 0	0, 0	0, 0	46.2865	10.0373	-2.10242	25.1247	-0.699942	-0.202756	-0.384218	-0.26605	-0.347109	-0.521013	0.529053	0.842957	0.823885	0.147876	-0.254664	0.502253
Q9ULV5	HSF4	Pan-specific	0, 0	0, 0	0, 0	0, 0	-3.9469	-6.76308	15.3873	48.537	1.12613	1.04663	1.02869	0.865159	0.886887	1.25233	1.09703	1.61823	-0.131732	-0.204639	0.535155	0.833926
Q92598	Hsp105	Pan-specific	4, 4	4, 4	2, 4	0, 0	-36.66	-39.7435	-26.4174	191.994	-8.18772	-9.59239	-6.10464	-6.62699	-6.19606	-8.71578	-1.70533	-0.371437	-2.32767	-0.653668	-3.68986	2.13425
P04792	Hsp27	Pan-specific	0, 0	0, 1	0, 0	0, 0	0.213209	49.354	79.37	44.1082	0.558116	0.526319	0.233619	0.608706	0.177036	0.947731	1.35478	1.86542	-0.0526918	0.469387	1.1286	0.817035
P04792	Hsp27	Pan-specific	0, 0	0, 0	0, 0	0, 0	36.802	72.8622	16.3488	20.6407	-0.834139	-0.546137	-0.871716	-0.314321	-0.46512	-0.538692	0.430346	0.670151	0.477247	0.69753	-0.107738	0.383693
P04792	Hsp27	S15	0, 3	0, 3	3, 0	0, 0	5.20703	0.533685	23.6086	0.722245	-0.810444	-0.820543	-0.630223	-0.666608	-1.25492	-1.31672	-1.16764	-1.23031	-0.0167345	-0.0455329	-0.0905045	-0.10027
P04792	Hsp27	S15	0, 0	0, 0	0, 0	0, 0	31.6747	55.1189	76.9651	40.0261	-0.72769	-0.727899	-0.505	-0.2579	-0.699933	-0.466184	-1.14402	-0.844949	-0.000346229	0.309224	0.342302	0.478526
P04792	Hsp27	S78	0, 0	0, 0	0, 0	0, 0	1.70184	-4.98361	37.7261	30.1398	0.378088	0.335911	0.616214	0.492935	0.437275	0.908506	0.714317	1.06566	-0.0698919	-0.154273	0.690069	0.562163
P04792	Hsp27	S82	0, 0	0, 0	0, 0	0, 0	6.83226	42.8919	34.7922	16.7076	0.805577	0.912158	0.581329	0.903267	0.684765	1.22225	0.753672	0.974308	0.176614	0.402875	0.787096	0.353022
P04792	Hsp27	S82	0, 0	2, 0	2, 2	2, 2	7.88576	3.25712	41.0405	-31.1221	-1.38344	-1.46292	-0.952854	-0.949878	-1.46879	-1.69788	-1.76694	-2.64313	-0.131693	0.00372375	-0.335483	-1.40192
P14602	Hsp27	S82	0, 0	0, 0	0, 0	0, 0	41.1338	22.1558	-0.29963	-2.7798	-0.437962	0.0157633	-0.0803796	0.112489	-0.0618007	-0.154416	0.357183	0.399248	0.751866	0.241358	-0.135626	0.0673038
P25685	Hsp40	Pan-specific	0, 0	2, 2	0, 0	2, 2	2.32948	-1.18844	75.773	-2.28729	-1.22617	-1.50581	-0.746778	-1.07571	-1.3287	-1.30003	-2.48276	-2.88431	-0.46338	-0.411623	0.041984	-0.6425
P25685	Hsp40	Pan-specific	0, 0	0, 0	0, 0	0, 0	10.0352	20.1619	22.1102	15.9133	0.956387	1.11454	0.975044	1.11399	0.884644	1.32696	1.20265	1.46674	0.262082	0.173878	0.647728	0.422558
P25685	Hsp40	Pan-specific	0, 0	0, 0	3, 3	0, 0	17.9777	37.3797	51.4029	37.4177	0.626573	0.841008	0.268752	0.537112	0.232588	0.804977	1.32871	1.79355	0.35534	0.335828	0.838203	0.743763
P29043	Hsp47	Pan-specific	0, 0	0, 0	0, 0	0, 0	36.6126	15.6817	-11.9302	-26.8986	-1.00205	-0.606853	-0.302832	-0.219439	-0.291628	-0.658157	-0.302448	-0.720176	0.654883	0.104359	-0.536742	-0.668373
P10809	Hsp60	Pan-specific	4, 4	4, 2	4, 4	0, 0	-36.66	-39.7435	-26.4174	54.9417	-8.18772	-9.59239	-6.10464	-6.62699	-6.19606	-8.71578	-0.965476	-0.409645	-2.32767	-0.653668	-3.68986	0.889342
P10809	Hsp60	Pan-specific	0, 0	0, 0	0, 0	0, 0	10.3238	21.7585	12.7774	20.584	1.1043	1.23873	1.08364	1.19483	1.04941	1.44935	1.26007	1.56654	0.222759	0.13914	0.585666	0.490357
P10809	Hsp60	Pan-specific	0, 0	0, 0	0, 0	0, 0	-0.0733951	48.7133	76.4682	-30.6316	-0.834406	-0.86899	-0.870544	-0.498792	-0.944503	-0.599886	-0.925555	-1.49208	-0.0573086	0.465214	0.504656	-0.90645
P08107	Hsp70	Pan-specific	0, 0	0, 0	0, 0	0, 0	31.0695	66.2686	39.674	-7.41802	-1.05189	-0.812863	-1.06102	-0.561529	-0.890768	-0.850129	-1.04422	-1.30198	0.396095	0.625074	0.0595104	-0.412411
P08107	Hsp70	Pan-specific	0, 0	0, 0	0, 0	0, 0	-29.0457	-6.67123	-10.6151	-46.6689	-0.135629	-0.672062	-0.269652	-0.341772	-0.413771	-0.834572	-0.391534	-1.21902	-0.888922	-0.0902517	-0.616219	-1.324
P08107	Hsp70	Pan-specific	0, 0	0, 0	0, 0	0, 0	33.508	49.6814	30.3292	16.0118	0.689908	1.08228	0.624527	0.997055	0.578967	1.10326	1.6526	1.95454	0.650195	0.466185	0.767772	0.483117
P07900	Hsp90	Pan-specific	2, 2	0, 2	2, 2	0, 0	-99.4761	75218.9	2736.11	107.248	-3.05656	-9.59239	-4.65373	-0.664915	-6.19606	-6.52455	-0.478959	0.465715	-10.8305	4.99164	-0.481033	1.5115
P07900	Hsp90	Pan-specific	0, 0	0, 0	0, 0	0, 0	21.2912	15.9926	15.2194	-4.57434	0.24839	0.484972	0.397563	0.50285	0.361995	0.583821	0.275682	0.137724	0.39204	0.131757	0.324841	-0.220736
P07900	Hsp90	Pan-specific	0, 0	0, 0	0, 0	0, 0	46.0904	74.1723	120.094	-11.3998	-0.431548	0.019869	-0.39452	0.170393	-0.533171	0.274883	-0.622416	-0.874264	0.748042	0.706937	1.18331	-0.402963
P07900	Hsp90	Pan-specific	0, 0	0, 0	0, 0	0, 0	17.3918	13.3498	0.975936	-29.1697	-0.938049	-0.807646	-0.731822	-0.639968	-0.783047	-1.12437	-0.913745	-1.48522	0.216091	0.114947	-0.499831	-0.914367
P07900	Hsp90	Pan-specific	0, 0	0, 0	0, 0	0, 0	53.8703	52.4994	55.2266	-24.7149	-0.318017	0.202886	-0.497007	-0.0558563	-0.593602	-0.154181	-0.30075	-0.600641	0.863188	0.55206	0.643486	-0.479831
P07900	Hsp90	Pan-specific	0, 0	0, 0	0, 0	0, 0	6.18194	-10.8885	41.18	-26.518	-0.651172	-0.783737	0.0960335	-0.0563856	-0.36381	-0.197035	-0.655281	-1.18191	-0.219673	-0.190739	0.244224	-0.842623
P07900	Hsp90	Pan-specific	0, 0	0, 0	0, 0	0, 0	50.2278	72.4615	116.186	63.2714	-0.557416	-0.193192	-1.10063	-0.373353	-1.00736	-0.398814	0.199916	0.79805	0.603554	0.910127	0.891144	0.957027
P07900	Hsp90	Pan-specific	0, 0	0, 2	2, 0	0, 0	72.9723	103.218	112.368	77.9455	-1.31307	-0.693604	-1.77268	-0.932694	-1.54695	-0.877662	0.212104	0.913972	1.02652	1.05117	0.980108	1.123
P07900	Hsp90	Pan-specific	0, 0	0, 0	0, 0	0, 0	50.3655	60.8329	127.261	43.6852	-1.03978	-0.589175	-1.74089	-1.02158	-1.47577	-0.885441	0.199954	0.65192	0.746692	0.90015	0.864475	0.723155
P07900	Hsp90	Pan-specific	0, 3	0, 0	2, 0	0, 0	54.5936	126.824	101.51	27.5978	-1.30425	-0.770888	-1.82881	-0.477903	-1.55158	-0.717276	0.247647	0.582976	0.883836	1.69054	1.22176	0.536533
P07900	Hsp90a	Pan-specific	0, 0	0, 0	0, 0	0, 0	22.6157	4.24343	57.6731	-28.7807	8.28336e-05	0.20221	0.117455	-0.00931513	0.160157	0.697723	0.568332	0.168745	0.334945	-0.158641	0.787208	-0.639348
P07900	Hsp90a	Pan-specific	0, 0	0, 0	3, 0	0, 0	14.3207	39.6236	60.0201	-30.2585	0.361787	0.501008	0.362927	0.668867	0.382471	1.08718	0.440986	0.00353118	0.230703	0.382856	1.03198	-0.699937
P07900	Hsp90a	Pan-specific	0, 0	0, 0	0, 0	0, 0	78.5821	167.834	110.171	65.1243	-0.67981	0.0405424	-1.29925	-0.288739	-1.01569	-0.366096	0.235007	0.841414	1.19369	1.26456	0.951259	0.970264
P07900	Hsp90a	Pan-specific	0, 0	0, 0	0, 0	0, 0	71.9374	-4.32486	118.231	53.0377	-1.36701	-0.767893	-0.693705	-0.74787	-1.21307	-0.570468	0.324734	0.833497	0.992791	-0.0677831	0.94103	0.814031
P07900	Hsp90a	Pan-specific	0, 0	0, 0	0, 0	0, 0	58.4726	38.7556	99.0559	33.0717	-0.642175	-0.0581392	-0.78287	-0.393112	-1.13313	-0.420312	0.370993	0.7529	0.967803	0.487747	1.04385	0.611058
P07900	Hsp90a	Pan-specific	0, 0	0, 0	0, 0	0, 0	2.50841	44.1162	51.0985	1.41198	0.891983	0.934908	0.723035	1.01494	0.65884	1.32423	1.62151	1.73362	0.0711303	0.365298	0.974389	0.179386
P07900	Hsp90a	Pan-specific	0, 0	0, 0	0, 0	0, 0	4.0229	45.8654	56.3819	18.7937	0.795734	0.84294	0.755824	1.0787	0.634768	1.38552	1.51869	1.8234	0.0782259	0.404056	1.09939	0.487539
P08238	Hsp90b	Pan-specific	0, 0	0, 0	0, 0	0, 0	60.757	100.685	58.1541	84.8088	-0.238648	0.363733	-0.0940564	0.597238	-0.0271164	0.515462	-0.407796	0.236958	0.998204	0.865092	0.794548	1.03162
O95351	HspBP1	Pan-specific	0, 0	0, 0	0, 0	0, 0	44.5359	49.6608	26.6321	9.23335	0.460709	0.958673	0.701046	1.07948	0.607455	1.04626	1.07209	1.23928	0.825175	0.473577	0.642587	0.267508
P42858	Huntingtin	S421	0, 0	0, 0	0, 0	0, 0	99.7708	79.3029	72.3116	-17.928	-1.25481	-0.387754	-1.16468	-0.487959	-1.1254	-0.659712	-0.853827	-1.03481	1.4368	0.84686	0.681954	-0.289575
P39687	I1PP2A	Pan-specific	0, 0	0, 0	0, 0	0, 0	9.96561	36.4779	18.4269	12.7828	0.858178	0.882403	0.718879	0.969038	0.621165	0.909261	1.51914	1.74516	0.0401439	0.313052	0.421885	0.361626
Q01105	I2PP2A	Pan-specific	0, 0	0, 0	0, 0	0, 0	23.0782	50.7556	17.2865	22.025	0.811946	1.03185	0.801011	1.14666	0.675613	1.00091	1.6117	1.95536	0.364403	0.432554	0.476363	0.54986
Q9UPZ9	ICK	Pan-specific	0, 0	0, 0	0, 0	0, 0	31.5535	48.0839	8.09033	-24.6757	-0.679721	-0.592266	-0.50564	-0.249784	-0.547166	-0.804588	-0.605701	-0.929119	0.144922	0.32018	-0.376967	-0.517476
P08069	IGF1R	Pan-specific	0, 0	0, 0	0, 0	0, 0	51.2023	68.2973	30.5044	-23.6896	-0.561469	-0.236761	-0.442087	-0.0672535	-0.53221	-0.575371	-0.509937	-0.894485	0.538073	0.46907	-0.0632044	-0.615285
P25963	IkBa	Pan-specific	2, 2	2, 2	2, 2	0, 0	-36.66	-98.894	-62.2984	9.55345	-8.18772	-9.59239	-3.30853	-6.62699	-0.971602	-3.46882	0.210443	0.279022	-2.32767	-4.15275	-3.65692	0.109728
P25963	IkBa	Pan-specific	4, 4	4, 2	4, 4	0, 0	-36.66	-39.7435	-26.4174	100.262	-8.18772	-9.59239	-6.10464	-6.62699	-6.19606	-8.71578	-1.18885	-0.467585	-2.32767	-0.653668	-3.68986	1.15404
P25963	IkBa	Pan-specific	0, 0	0, 0	0, 0	0, 0	6.88936	0.14135	-12.7435	-6.66996	-0.345765	-0.398381	-0.0936301	-0.128262	-0.114931	-0.466985	0.0755514	-0.0141311	-0.087189	-0.0433381	-0.515546	-0.143494
P25963	IkBa	Pan-specific	2, 2	2, 2	2, 2	2, 2	37.6939	-9.31482	61.3916	-18.1054	-2.02312	-1.90846	-1.41225	-1.436	-2.10664	-2.44489	-2.73726	-2.75666	0.190005	-0.0297211	-0.495335	-0.0310389
Q15653	IkBb	Pan-specific	2, 4	0, 0	2, 0	0, 0	-36.66	-99.8502	-56.3697	-7.08076	-8.18772	-9.59239	-0.675801	-6.62699	-0.97114	-2.82257	0.603951	0.566085	-2.32767	-7.44737	-2.71122	-0.0605859
Q15653	IkBb	Pan-specific	0, 0	2, 0	2, 2	2, 3	12.676	33.7204	23.3164	-51.6895	-1.17099	-1.31139	-1.30142	-1.09966	-1.29711	-1.58592	-0.990945	-2.35989	-0.232658	0.252476	-0.422919	-2.19034
O15111	IKKa	Pan-specific	0, 0	0, 0	0, 0	0, 0	30.5962	46.123	25.5067	-17.5271	-0.849817	-0.641196	-0.720668	-0.416224	-0.783688	-0.847254	-0.742895	-1.06055	0.345705	0.380983	-0.0930849	-0.508257
O15111	IKKa	Pan-specific	0, 3	0, 0	0, 0	3, 0	-1.48991	34.2915	43.0549	-11.2936	-1.20364	-1.36298	-0.633243	-0.445617	-0.786074	-0.693939	-0.0203635	-0.155714	-0.264042	0.234797	0.134922	-0.216563
O15111	IKKa	Pan-specific	4, 4	4, 2	4, 4	0, 0	-36.66	-39.7435	-26.4174	37.1067	-8.18772	-9.59239	-6.10464	-6.62699	-6.19606	-8.71578	-1.05283	-0.719608	-2.32767	-0.653668	-3.68986	0.533156
O15111	IKKa	Pan-specific	0, 0	0, 0	0, 0	0, 3	32.7244	34.4006	40.7919	-7.07154	0.0580731	0.411311	0.18392	0.441101	-0.150363	0.146649	0.441665	0.426574	0.58535	0.321838	0.434943	-0.0241474
O15111	IKKa	Pan-specific	0, 0	0, 0	0, 0	0, 0	102.373	112.118	32.4945	-14.3857	-0.645114	0.22926	-0.672745	-0.00384592	-0.566858	-0.491972	-0.364027	-0.667474	1.44892	0.837067	0.109664	-0.485521
O15111	IKKa/b	S180/S181	0, 2	2, 2	2, 2	2, 2	20.3431	43.4945	70.9858	-51.9846	-1.57527	-1.58415	-1.63176	-1.34024	-1.8109	-1.72806	-1.2979	-2.05147	-0.0147153	0.364808	0.12131	-1.20573
O14920	IKKb	Pan-specific	2, 2	2, 2	2, 2	2, 2	27.5796	40.902	59.5453	179.22	-3.09059	-2.58561	-1.89208	-1.92781	-2.59026	-2.93246	-3.66253	-4.82453	0.836811	-0.0447132	-0.501118	-1.85923
O14920	IKKb	Pan-specific	0, 0	0, 0	0, 0	0, 0	104.519	46.8709	40.9308	-8.02963	-0.918764	-0.200293	-0.690152	-0.34089	-0.768839	-0.610729	-0.605286	-0.818111	1.19058	0.43707	0.231535	-0.340524
O14920	IKKb	Pan-specific	0, 0	0, 0	0, 0	0, 0	68.6191	20.2403	2.86655	12.9243	-0.220342	0.396627	0.30552	0.447805	0.319085	0.399769	0.653682	0.841577	1.02238	0.178057	0.118153	0.300635
Q9Y6K9	IKKg (NEMO)	Pan-specific	0, 0	0, 0	0, 0	0, 0	63.6408	5.77861	1.67282	1.66118	0.460308	1.10754	0.799519	0.804997	0.599407	0.759388	1.27358	1.35395	1.07253	0.00685555	0.234275	0.128584
Q13418	ILK1	Pan-specific	0, 0	0, 0	0, 0	0, 0	31.7492	88.0043	24.6665	-6.71801	-0.575544	-0.312258	-0.53445	0.0919535	-0.175753	-0.0461251	-0.370743	-0.464256	0.436291	0.783887	0.189826	-0.149622
Q13418	ILK1	Pan-specific	0, 0	0, 0	0, 0	0, 0	35.8228	96.8582	30.418	-14.5185	-1.2578	-0.974241	-1.37548	-0.694448	-1.06743	-1.119	-0.898917	-1.29885	0.469881	0.852256	-0.0755128	-0.639902
P13612	Integrin a4	S1027	0, 0	0, 0	0, 0	0, 0	34.167	13.9188	14.3019	-13.4402	-0.0224541	0.281329	0.228894	0.308075	0.177535	0.370916	0.850605	0.708927	0.503399	0.0990885	0.283187	-0.226689
P05556	Integrin b1	S785	0, 0	0, 0	0, 0	3, 0	82.6734	139.86	111.915	68.921	-0.715976	0.00914588	-0.782657	0.117041	-0.88596	-0.18803	-0.536915	0.127573	1.2016	1.12589	1.02204	1.0632
P06213	IR	Pan-specific	0, 0	0, 0	0, 0	0, 0	54.5365	10.5929	15.3672	7.17631	0.457324	1.03663	0.770176	0.820487	0.591644	0.873949	1.26438	1.42439	0.959971	0.0629602	0.413406	0.25603
P06213	IR (INSR)	Y999	0, 0	0, 0	0, 0	0, 0	38.2389	42.1742	25.744	4.08925	0.604838	1.05827	0.637564	0.961734	0.683127	1.1174	1.18955	1.30502	0.751384	0.405669	0.635953	0.184749
P06213	IR (INSR)	Y999	0, 0	1, 0	0, 0	0, 0	51.3488	48.2394	13.8763	4.9723	0.497855	1.0347	0.664136	1.03693	0.679708	1.00016	1.242	1.37912	0.889606	0.466514	0.469261	0.219394
P06213	IR/IGF1R (INSR)	Y1189/Y1190	0, 0	0, 0	0, 0	0, 0	78.667	328.131	220.173	8.41266	-0.535993	0.195738	-1.34699	0.115171	-1.17746	0.0590074	-0.160991	-0.0517295	1.21255	1.82977	1.81068	0.174821
P51617	IRAK1	Pan-specific	0, 0	0, 0	0, 0	0, 0	58.532	2.05805	51.4266	-20.5152	-0.664311	-0.158463	0.00896371	-0.0356026	-0.438413	-0.160639	0.354316	0.0598069	0.838239	-0.0557707	0.40677	-0.47122
P51617	IRAK1	Pan-specific	4, 1	4, 4	4, 4	0, 0	-36.66	-39.7435	-26.4174	99.4955	-8.18772	-9.59239	-6.10464	-6.62699	-6.19606	-8.71578	-0.93246	-0.178492	-2.32767	-0.653668	-3.68986	1.20637
O43187	IRAK2	Pan-specific	0, 0	0, 0	0, 0	0, 0	18.8121	80.2436	38.6033	88.8176	-0.401306	-0.279171	-0.536546	0.0299926	-0.181629	0.0974303	0.0608359	0.779007	0.20239	0.708971	0.408652	1.14909
O43187	IRAK2	Pan-specific	0, 0	0, 0	0, 0	0, 0	52.0551	13.0849	18.5049	20.7583	-0.011052	0.521923	0.501649	0.576878	0.518608	0.809031	0.814571	1.07983	0.883192	0.094143	0.425294	0.424427
Q9Y616	IRAK3	Pan-specific	0, 0	0, 0	0, 0	0, 0	106.427	70.9714	75.0724	7.1386	-1.27837	-0.41176	-0.588944	-0.0759336	-0.637259	-0.125469	-0.404815	-0.351217	1.43606	0.641986	0.749462	0.0857585
Q9NWZ3	IRAK4	Pan-specific	0, 0	2, 2	2, 2	2, 2	64.0766	52.6315	8.75582	-53.7577	-1.8153	-1.36742	-1.55904	-1.17574	-1.93357	-2.58906	-1.91881	-4.65716	0.742172	0.479665	-0.959889	-4.38141
Q9NWZ3	IRAK4	Pan-specific	0, 0	0, 0	0, 2	0, 0	66.0285	42.5097	38.5287	-25.9902	-1.28154	-0.821171	-1.10103	-0.841376	-0.993503	-1.04111	-1.08735	-1.52237	0.762871	0.324927	-0.0697191	-0.696039
	IRb/IGF1Rb	Y1131/Y1146	0, 0	0, 0	0, 0	2, 2	123.018	134.681	39.9195	-54.6175	-1.37039	-0.536815	-1.64682	-0.791377	-1.21945	-1.12941	-1.52233	-3.08087	1.38132	1.07051	0.131846	-2.49371
P35568	IRS1	Y612	0, 0	0, 0	0, 0	0, 0	67.6538	47.543	18.1331	7.61206	0.227991	0.937903	0.303743	0.644167	0.527724	0.80427	0.867962	1.00817	1.17639	0.42601	0.404971	0.224336
P35568	IRS1	Y1179	0, 0	0, 0	0, 0	0, 0	112.6	906.872	405.988	120.32	-0.491854	0.411987	-1.81048	0.550344	-1.56002	0.0657491	-0.376101	0.529989	1.49775	2.95436	2.38077	1.44976
P35568	IRS1	S312	0, 0	0, 0	0, 0	0, 0	142.363	306.528	324.216	287.953	-1.91765	-0.826532	-2.10842	-0.654541	-1.84173	-0.549111	-1.46177	-0.0952559	1.80808	1.8194	1.89291	2.18644
P35568	IRS1	S639	0, 0	0, 0	0, 0	0, 0	14.2195	158.472	29.3922	-19.5991	-0.673308	-0.596517	-0.83708	0.0554333	-0.443576	-0.333142	-0.0648873	-0.249507	0.12725	1.1169	0.16172	-0.295395
P23458	JAK1	Pan-specific	3, 3	0, 0	3, 3	0, 0	41.6963	94.8133	-13.5732	11.8906	0.909844	1.38794	0.812556	1.42948	1.17034	1.28943	1.91593	2.18322	0.792245	0.772018	0.174396	0.427667
P23458	JAK1	Pan-specific	0, 0	0, 0	0, 0	0, 0	63.085	83.7041	42.1315	22.0278	-0.776327	-0.215798	-0.675836	-0.0633368	-0.513657	-0.370527	-0.398627	-0.171914	0.928851	0.766487	0.209598	0.362746
O60674	JAK2	Pan-specific	0, 0	0, 0	0, 0	0, 0	85.6601	46.177	39.3127	1.2354	0.262509	1.0632	0.373087	0.715655	0.51583	1.03075	0.941653	1.0292	1.32682	0.428693	0.754049	0.140082
P52333	JAK3	Pan-specific	2, 2	2, 2	2, 0	0, 0	-36.66	-39.7435	4081.84	40.9302	-8.18772	-9.59239	-6.10464	-6.62699	-5.24342	-1.36415	-0.164236	0.199765	-2.32767	-0.653668	5.68079	0.58241
Q9UHG7	JIK (TAO3)	Pan-specific	0, 0	0, 0	0, 0	0, 0	37.3453	127.353	39.0018	-4.95544	-0.816101	-0.463202	-0.634095	0.122581	-0.600474	-0.495743	-0.573251	-0.538234	0.584787	0.946912	0.153367	0.0560279
P45983	JNK	T183/Y185	0, 0	0, 0	0, 0	0, 0	59.2211	48.8071	21.5728	11.9856	0.240061	0.839173	-0.0112851	0.32219	0.517682	0.855374	0.514715	0.669461	0.992787	0.417313	0.494514	0.247597
P45983	JNK	T183/Y185	0, 0	0, 0	0, 0	0, 0	79.0765	102.13	58.2443	26.6284	0.144658	0.90385	0.0153225	0.684075	0.299001	0.915248	0.614893	0.928995	1.25806	0.836883	0.902429	0.502569
P45983	JNK	T183+Y185	0, 0	0, 0	0, 0	0, 0	68.3273	56.9741	2.82307	14.0184	0.263756	0.9081	0.32012	0.73792	0.413202	0.545257	0.852454	1.06461	1.06774	0.522839	0.19338	0.339451
P45983	JNK1	Pan-specific	0, 0	0, 0	0, 0	0, 0	93.6773	41.9208	28.234	16.7388	0.108759	0.973163	0.454082	0.798434	0.430188	0.879984	1.10284	1.35894	1.4324	0.430926	0.658678	0.409758
P45983	JNK1/2/3	Pan-specific	0, 0	0, 0	0, 0	0, 0	67.8442	77.9175	32.8664	-34.091	-1.5033	-0.906279	-1.25314	-0.753128	-1.19894	-1.18245	-0.874844	-1.36256	0.989318	0.62572	0.0241412	-0.78035
P45983	JNK1/2/3	Pan-specific	4, 4	4, 4	4, 4	0, 0	-36.66	-39.7435	-26.4174	50.2923	-8.18772	-9.59239	-6.10464	-6.62699	-6.19606	-8.71578	-0.687051	-0.264327	-2.32767	-0.653668	-3.68986	0.676368
P45983	JNK1/2/3	Pan-specific	0, 0	0, 0	0, 0	0, 0	6.865	-13.8526	-1.81242	-34.3374	-0.799977	-0.945404	-0.493135	-0.771617	-0.843193	-1.38291	-0.869184	-1.46682	-0.240986	-0.348495	-0.79036	-0.956237
P45984	JNK2	Pan-specific	0, 0	0, 2	2, 2	0, 0	5.02471	-35.0707	-8.80553	5.80865	-1.34906	-1.8276	-0.803119	-1.32563	-1.21735	-1.98231	-0.475676	-0.446918	-0.792986	-0.653875	-1.1202	0.0460133
P45984	JNK2/3	Pan-specific	3, 3	2, 2	3, 3	0, 0	0.216518	-19.8721	-17.4826	103.346	-1.48971	-2.01028	-1.31843	-1.65742	-0.533705	-0.925985	-0.400438	0.387879	-0.862624	-0.424208	-0.574452	1.26132
P53779	JNK3	Pan-specific	0, 0	0, 0	0, 0	0, 0	-7.44425	-20.8819	-7.20557	-39.1673	-0.39124	-0.737946	-0.370079	-0.852279	-0.560057	-1.06322	-0.576496	-1.24083	-0.574526	-0.603429	-0.736834	-1.06295
P05412	Jun	Pan-specific	0, 0	0, 0	0, 0	0, 0	15.576	25.5302	-18.264	6.47249	0.867219	1.08276	0.59934	0.845081	0.730025	0.62743	1.27928	1.43921	0.357174	0.307523	-0.150239	0.255895
P05412	Jun	S63	0, 0	2, 0	2, 2	2, 2	72.6606	143.107	168.01	10.4798	-1.87418	-1.41683	-1.99723	-1.06032	-2.16561	-1.76294	-2.56554	-2.87128	0.757861	1.17246	0.58966	-0.48919
P05412	Jun	S73	0, 0	0, 0	0, 1	0, 0	-17.247	68.9799	44.9955	-59.5571	0.240684	-0.0828217	-0.156863	0.311604	-0.188288	0.0746594	0.259684	-0.775396	-0.536081	0.586244	0.385058	-1.65615
P05412	Jun	S73	0, 0	3, 0	0, 3	0, 3	46.4932	-26.1565	-0.467478	12.9362	-0.0949641	0.33794	-0.149829	-0.481996	-0.168417	-0.579614	-0.501485	-0.569377	0.717364	-0.415676	-0.602154	-0.108628
P05412	Jun	S73	0, 0	0, 0	0, 0	0, 0	-3.74948	-1.08667	-8.62205	-10.4948	1.02591	0.959494	0.93412	0.847198	0.890733	0.930853	1.17148	1.11755	-0.110063	-0.108775	0.0587508	-0.0862794
Q16667	KAP	Pan-specific	4, 4	4, 4	4, 4	1, 0	-36.66	-39.7435	-26.4174	322.811	-8.18772	-9.59239	-6.10464	-6.62699	-6.19606	-8.71578	-1.947	-0.45106	-2.32767	-0.653668	-3.68986	2.39354
P24390	KDEL receptor 1	Pan-specific	0, 0	0, 0	0, 0	0, 0	7.61102	-15.9595	-23.1628	-56.0671	0.270704	0.309973	0.311701	0.0743108	0.321791	-0.0278801	0.485435	-0.464093	0.0650721	-0.297072	-0.512056	-1.51926
Q9Y4K4	KHS	Pan-specific	4, 4	4, 4	4, 0	0, 0	-36.66	-39.7435	34826.1	68.306	-8.18772	-9.59239	-6.10464	-6.62699	-6.19606	-4.5309	-0.769722	-0.183933	-2.32767	-0.653668	2.43846	0.937275
P10721	Kit	Y703	0, 0	0, 0	0, 0	0, 0	3.83882	-18.7159	-25.5679	-36.8173	1.34196	1.43194	1.14261	0.877861	1.2108	1.09855	1.40753	0.961883	0.149096	-0.331311	-0.164379	-0.713045
P10721	Kit	Y730	0, 0	0, 0	0, 0	0, 0	-5.71206	-30.2303	-31.5906	-35.0445	1.43772	1.39141	1.0706	0.616327	1.1248	0.852263	1.26475	0.844581	-0.0767416	-0.568486	-0.399099	-0.672283
P10721	Kit	Y936	0, 0	0, 0	0, 0	1, 0	11.4317	10.3043	-33.8093	-9.52613	0.671113	0.808356	0.591596	0.687815	0.565791	0.0823911	0.938634	0.899558	0.227425	0.12041	-0.707888	-0.0625236
Q8IVT5	Ksr1	Pan-specific	2, 3	2, 2	2, 2	2, 2	15.3813	-7.0358	-14.6406	-72.5558	-1.69869	-1.73389	-1.33609	-1.47256	-1.91669	-3.27473	-1.51927	-3.45487	-0.0583278	-0.170779	-1.9887	-3.097
Q8IVT5	Ksr-1	Pan-specific	4, 4	4, 4	4, 4	0, 3	-36.66	-39.7435	-26.4174	45.6171	-8.18772	-9.59239	-6.10464	-6.62699	-6.19606	-8.71578	-0.820358	-0.393241	-2.32767	-0.653668	-3.68986	0.683397
P10586	LAR	Pan-specific	0, 0	0, 0	0, 0	0, 0	18.1659	11.3629	-5.45596	-3.9402	0.9779	1.20559	0.789537	0.825075	0.807406	0.922838	1.15171	1.17168	0.377312	0.0444724	0.169039	0.0319548
O95835	LATS1	Pan-specific	0, 0	0, 0	0, 0	0, 0	-18.1393	-1.45583	7.44624	-46.5528	0.203583	-0.189135	-0.151925	-0.329599	-0.161295	-0.252901	-0.0994876	-0.881857	-0.650772	-0.222343	-0.134148	-1.25181
P06239	Lck	Pan-specific	4, 4	4, 4	2, 2	0, 0	-36.66	-39.7435	532.627	84.9191	-8.18772	-9.59239	-6.10464	-6.62699	-6.19606	-8.71578	-0.514804	0.167202	-2.32767	-0.653668	-3.68986	1.09122
P06239	Lck	Pan-specific	0, 0	0, 0	0, 0	0, 0	21.5118	5.88095	21.8336	1.07718	0.823259	1.09672	0.712023	0.736932	0.578255	0.952634	1.22381	1.31131	0.453153	0.0311715	0.548238	0.14
P06239	Lck	S158	0, 0	0, 0	0, 0	0, 0	31.9926	26.0675	55.9165	-14.1186	0.894032	1.2908	0.543425	0.732698	0.723366	1.41621	1.0184	0.939673	0.657482	0.236858	1.01459	-0.125964
P06239	Lck	Y192	0, 0	0, 0	0, 0	0, 0	21.6828	-12.3661	-18.8926	-36.0908	1.31555	1.63307	0.987655	0.793106	1.08627	1.06182	1.34935	0.918763	0.526157	-0.24346	-0.035801	-0.688945
P06239	Lck	Y505	0, 0	0, 0	0, 0	0, 0	-0.62877	0.374288	-5.47739	-2.09757	0.954695	0.962295	0.743675	0.656588	0.779096	0.831755	0.970329	1.00281	0.012595	-0.108982	0.0771137	0.0519714
P53667	LIMK1	Pan-specific	0, 0	0, 0	0, 0	0, 0	35.3163	11.3271	-0.989507	0.0940135	0.651293	1.06141	0.711099	0.809584	0.579679	0.680468	1.25423	1.33941	0.679607	0.123245	0.147594	0.136297
P53667	LIMK1/2	Y507+T508, Y504+T505	0, 0	0, 0	0, 0	0, 0	28.331	-1.5454	0.922416	-3.19585	1.00231	1.3719	1.10655	1.02863	0.967153	1.18817	1.54325	1.60572	0.612449	-0.0975093	0.323654	0.0999561
O94804	LOK	Pan-specific	0, 0	0, 0	0, 0	0, 0	-2.09701	7.04161	55.1523	-50.9107	-0.0217414	-0.0596849	-0.128337	-0.0720875	-0.107204	0.289545	0.336431	-0.475543	-0.062876	0.0703915	0.580996	-1.29918
P07948	Lyn	Pan-specific	2, 2	0, 2	2, 2	0, 0	-90.294	-96.4408	-98.9046	35.9427	-8.18772	-9.59239	-3.5847	-6.62699	-2.62081	-8.71578	-0.191818	0.153153	-2.32767	-3.80715	-8.92544	0.551961
P07948	Lyn	Y508	0, 0	0, 0	0, 0	2, 0	-17.5155	-34.7563	-28.5902	-61.0605	-0.652641	-0.979119	-0.657967	-1.34176	-0.672656	-1.73947	-1.36483	-2.60655	-0.541006	-0.855699	-1.56223	-1.98677
P20794	MAK	Pan-specific	0, 0	0, 0	0, 0	0, 0	55.759	41.2429	-20.0666	-39.2062	-0.698561	-0.150348	-0.564184	-0.221309	-0.351275	-0.811424	-0.298449	-0.938742	0.908442	0.429077	-0.673839	-1.02448
P49137	MAPKAPK2	Pan-specific	4, 4	4, 4	2, 2	0, 0	-36.66	-39.7435	-26.4174	73.6088	-8.18772	-9.59239	-6.10464	-6.62699	-6.19606	-8.71578	-0.685768	-0.105488	-2.32767	-0.653668	-3.68986	0.928461
P49137	MAPKAPK2	T222	0, 0	0, 0	0, 1	0, 0	-4.97528	-3.76496	-30.5284	-28.8163	-0.365273	-0.526478	-0.346882	-0.403839	-0.100651	-0.70153	-0.302788	-0.763378	-0.267132	-0.0712767	-0.879923	-0.736954
P49137	MAPKAPK2ab	T334	0, 0	0, 0	0, 0	0, 0	30.143	17.8671	-0.927172	-47.7846	0.150893	0.448069	-0.396723	-0.252748	-0.282334	-0.473585	-0.0287023	-0.770564	0.492449	0.180171	-0.280068	-1.187
P49137	MAPKAPK2ab	T334	0, 0	0, 0	0, 0	0, 0	15.9184	-2.95465	-6.36268	-4.73563	0.957634	1.11329	0.97174	0.846987	0.945466	1.03938	1.24219	1.27558	0.257934	-0.156118	0.137527	0.0534295
P29966	MARCKS	S159+S163	0, 0	0, 2	0, 0	0, 0	33.3501	29.5033	42.9775	-35.169	-1.59487	-1.26125	-1.37445	-1.022	-1.2495	-1.11659	-0.631887	-1.3079	0.552838	0.441064	0.194637	-1.08164
Q9P0L2	MARK	Pan-specific	0, 0	0, 0	0, 0	0, 0	30.4406	89.5948	49.8404	-33.7385	-1.02254	-0.753451	-1.30287	-0.647554	-1.13217	-1.08048	-0.604342	-1.15678	0.445908	0.820073	0.075695	-0.883912
Q07820	Mcl1	Pan-specific	4, 4	4, 4	4, 2	0, 0	-36.66	-39.7435	-26.4174	128.854	-8.18772	-9.59239	-6.10464	-6.62699	-6.19606	-8.71578	-1.1653	-0.286455	-2.32767	-0.653668	-3.68986	1.40618
Q9P2K5	MEF-2	Pan-specific	4, 4	4, 4	4, 4	0, 0	-36.66	-39.7435	-26.4174	49.7656	-8.18772	-9.59239	-6.10464	-6.62699	-6.19606	-8.71578	-1.26526	-0.754892	-2.32767	-0.653668	-3.68986	0.816595
Q02750	MEK1 (MAP2K1)	Pan-specific	0, 0	0, 0	0, 0	0, 0	15.0466	11.1131	-5.17425	-8.38852	1.00596	1.14116	0.822716	0.864418	0.89522	1.00657	1.23834	1.21614	0.224038	0.0521854	0.163056	-0.0355222
Q02750	MEK1 (MAP2K1)	Pan-specific	0, 0	0, 0	0, 0	3, 0	32.1439	25.1145	49.158	-52.8578	-1.28751	-0.957721	-1.21026	-0.86971	-1.48588	-1.33162	-0.698861	-1.6603	0.546484	0.42617	0.225906	-1.53832
Q02750	MEK1 (MAP2K1)	Pan-specific	0, 0	0, 0	0, 0	0, 0	4.1076	-0.53349	2.18012	-55.808	-1.08877	-1.14161	-0.993742	-0.988127	-1.00579	-1.39305	-0.659997	-1.66728	-0.0875572	0.00702642	-0.567099	-1.61168
Q02750	MEK1 (MAP2K1)	Pan-specific	0, 0	0, 0	0, 0	0, 0	38.548	77.6414	15.3844	-24.679	-0.445979	-0.160347	-0.77367	-0.222685	-0.357436	-0.295756	-0.160425	-0.510421	0.47332	0.689508	0.0903234	-0.560002
Q02750	MEK1 (MAP2K1)	Pan-specific	0, 0	0, 0	2, 0	0, 0	6.63431	8.42021	7.069	-29.0673	-1.07479	-1.25275	-0.997863	-0.900761	-1.13844	-1.46485	-1.30823	-1.76753	-0.294908	0.121514	-0.477996	-0.734883
Q02750	MEK1 (MAP2K1)	T292	0, 0	0, 0	0, 0	0, 0	26.5357	26.8856	-3.07813	-26.0219	1.25556	1.58839	0.863889	1.02535	1.05433	1.25045	1.18567	0.927046	0.551535	0.202058	0.287197	-0.413798
Q02750	MEK1 (MAP2K1)	T292	0, 0	0, 0	0, 0	0, 0	39.4709	21.531	26.7041	-26.9389	0.792215	1.28109	0.853054	1.01025	0.72301	1.21198	1.32712	1.05669	0.810114	0.196718	0.716039	-0.432698
Q02750	MEK1 (MAP2K1)	T292	0, 0	0, 2	2, 0	0, 3	-9.95832	-24.7924	-24.3725	-65.0156	-1.51319	-1.85122	-1.07999	-1.39271	-1.14517	-1.89566	-0.197365	-1.55083	-0.560151	-0.391332	-1.09901	-2.16558
Q02750	MEK1 (MAP2K1)	S298	0, 0	0, 0	0, 0	0, 0	30.1315	-4.52411	-0.298593	-18.052	1.02761	1.36596	1.10574	1.01932	1.00825	1.24017	1.38078	1.26657	0.560682	-0.108144	0.339625	-0.182739
Q02750	MEK1 (MAP2K1)	T386	0, 0	0, 0	0, 0	0, 0	7.3476	-10.5039	29.2562	-19.8257	0.439864	0.490817	0.337456	0.173462	0.404656	0.780792	0.886074	0.732233	0.0844327	-0.205223	0.550811	-0.246149
Q02750	MEK1 (MAP2K1)	T386	0, 0	0, 0	0, 0	3, 0	19.8714	-4.36439	-12.003	-35.5889	1.14394	1.41658	1.03952	0.88693	1.07174	1.13537	1.54284	1.12762	0.451785	-0.190954	0.0931748	-0.66435
Q02750	MEK1 (MAP2K1)	T386	0, 0	0, 0	0, 0	0, 0	7.62763	15.8434	6.32912	-69.1933	-1.25134	-1.13528	-0.957507	-0.718231	-1.21988	-1.41836	-0.118542	-1.47105	0.19232	0.299433	-0.290664	-2.16404
Q02750	MEK1/2	Pan-specific	0, 0	0, 0	3, 0	0, 0	7.10764	7.16353	4.08468	-41.2668	-0.906026	-1.04713	-0.93971	-0.871721	-0.966795	-1.20687	-1.01038	-1.65583	-0.233822	0.0850814	-0.351568	-1.03274
Q02750	MEK1/2+B23 (NPM)	S217+S221, S4	0, 0	2, 2	2, 2	2, 2	16.7848	77.0807	26.3551	-57.0432	-1.78096	-1.58309	-2.05378	-1.37672	-1.95227	-2.02483	-1.87429	-2.65544	0.327882	0.84728	-0.106261	-1.24985
P36507	MEK2 (MAP2K2)	Pan-specific	0, 0	0, 0	0, 0	0, 0	30.0754	6.16177	42.3873	-14.6782	0.790567	1.15971	0.610886	0.633158	0.676289	1.28557	1.28283	1.21054	0.6117	0.0278722	0.892225	-0.115666
P36507	MEK2 (MAP2K2)	Pan-specific	0, 0	0, 0	0, 0	0, 0	-0.745089	44.0473	27.1574	-32.3599	-0.602802	-0.71563	-0.865429	-0.662797	-0.791558	-0.874267	-0.716067	-1.04918	-0.186968	0.253575	-0.121119	-0.532991
P36507	MEK2 (MAP2K2)	Pan-specific	0, 0	0, 0	0, 0	2, 0	-57.0931	-46.1174	-40.4498	-28.7152	0.26968	-1.10954	-0.0603795	-0.859371	-0.160797	-1.11885	-1.02755	-1.5527	-2.28549	-0.999866	-1.40297	-0.840258
P36507	MEK2 (MAP2K2)	T394	0, 0	0, 0	0, 0	0, 0	-37.1044	-35.7595	-22.8406	4.62944	1.5664	0.950413	1.34403	0.837848	1.28964	1.26879	0.895959	1.01065	-1.02075	-0.633446	-0.0305354	0.183503
P36507	MEK2 (MAP2K2)	T394	0, 0	1, 0	0, 0	0, 0	-32.3851	-31.7527	-15.5861	-1.88285	1.56822	1.04716	1.31252	0.863077	1.31307	1.41225	1.0244	1.0787	-0.86345	-0.562442	0.145235	0.0868789
P36507	MEK2 (MAP2K2)	T394	0, 0	0, 0	0, 0	0, 0	-21.8444	-31.0681	-22.0387	-29.5209	1.79872	1.51183	1.76329	1.32927	1.62334	1.70582	1.51152	1.22247	-0.475396	-0.543143	0.120778	-0.462481
P46734	MEK3 (MAP2K3)	Pan-specific	4, 4	2, 2	4, 4	1, 0	-36.66	-39.7435	-26.4174	341.985	-8.18772	-9.59239	-6.10464	-6.62699	-6.19606	-8.71578	-1.60835	0.111048	-2.32767	-0.653668	-3.68986	2.75108
P45985	MEK4 (MAP2K4)	Pan-specific	0, 0	0, 0	0, 0	0, 0	-54.2135	-70.8831	-41.1991	-32.3335	0.562214	-0.659117	0.797139	-0.433832	0.296686	-0.511725	-0.265584	-0.782827	-2.02386	-1.54045	-1.18383	-0.827599
P46734	MEK3 (MAP2K3)	Pan-specific	4, 4	4, 4	4, 4	0, 0	-36.66	-39.7435	-26.4174	360.136	-8.18772	-9.59239	-6.10464	-6.62699	-6.19606	-8.71578	-2.70281	-0.766423	-2.32767	-0.653668	-3.68986	3.09826
P46734	MEK3 (MAP2K3)	S218	0, 0	0, 1	0, 0	0, 0	-29.0647	7.77967	1.24046	-54.3368	0.109115	-0.434752	0.231096	0.233235	-0.0189617	0.0236018	0.0344234	-0.862814	-0.901241	0.00267681	0.0623298	-1.4356
P46734	MEK3/6 (MAP2K3/6)	S218/S207	0, 0	0, 0	0, 3	2, 2	-17.713	-34.326	-33.4446	-33.1196	-0.8887	-1.32719	-0.537647	-0.964768	-0.547843	-1.38994	-1.56391	-1.98338	-0.726614	-0.534504	-1.23316	-0.671159
P46734	MEK3/6 (MAP2K3/6)	S218/S207	0, 0	0, 0	0, 0	0, 1	-8.41916	-20.5321	-17.901	16.1472	1.77186	1.72446	1.76063	1.48861	1.59225	1.76597	1.59551	1.85771	-0.0785474	-0.340399	0.254396	0.419517
P46734	MEK3/6 (MAP2K3/6)	S218/S207	0, 0	0, 0	0, 0	0, 0	-41.3296	-46.957	-11.7681	15.6562	1.72233	1.02035	1.57295	0.859866	1.1718	1.28953	1.0124	1.25394	-1.16324	-0.892362	0.172396	0.386469
P46734	MEK3b (MAP2K3)	Pan-specific	0, 0	0, 0	0, 0	0, 0	-35.254	-34.9299	-37.2988	16.7618	1.67035	1.14087	1.46308	0.99335	1.52712	1.31744	1.09285	1.35382	-0.877406	-0.587819	-0.307057	0.417571
P45985	MEK4 (MAP2K4)	Pan-specific	4, 4	2, 2	2, 4	0, 0	-36.66	-39.7435	-26.4174	668.533	-8.18772	-9.59239	-6.10464	-6.62699	-6.19606	-8.71578	-3.38078	-0.619562	-2.32767	-0.653668	-3.68986	4.41801
P45985	MEK4 (MAP2K4)	Pan-specific	0, 0	1, 0	0, 0	0, 0	-13.7364	-17.9498	-17.8159	-18.9193	0.483958	0.253507	0.713053	0.464001	0.695732	0.555205	0.0504218	-0.214913	-0.38188	-0.311666	-0.205788	-0.424541
P45985	MEK4 (MAP2K4)	Pan-specific	0, 0	0, 0	0, 0	0, 0	-23.8484	-28.6815	-15.5245	-30.8386	-0.343226	-0.820301	-0.413135	-0.658105	-0.663184	-0.818495	-0.720897	-1.23336	-0.79056	-0.306558	-0.227438	-0.819947
P45985	MEK4 (MAP2K4)	S257+T261	0, 0	0, 0	0, 0	0, 0	-47.0889	-37.782	-26.556	-7.41608	0.732488	-0.272795	0.790212	0.162912	0.587264	0.195397	0.256514	0.204475	-1.66585	-0.785009	-0.573848	-0.0832635
Q13163	MEK5 (MAP2K5)	Pan-specific	4, 4	4, 4	4, 4	0, 0	-36.66	-39.7435	-26.4174	2441.67	-8.18772	-9.59239	-6.10464	-6.62699	-6.19606	-8.71578	-3.25645	-0.487765	-2.32767	-0.653668	-3.68986	4.42996
Q13163	MEK5 (MAP2K5)	Pan-specific	0, 0	2, 0	2, 2	2, 2	-21.7378	-15.6412	-23.3904	-20.9128	-1.00014	-1.61217	-0.748732	-1.17302	-0.874173	-1.58257	-1.46686	-1.89718	-1.0142	-0.530961	-1.03737	-0.688514
P52564	MEK6 (MAP2K6)	Pan-specific	0, 0	0, 1	0, 0	0, 0	-20.0626	0.716385	-17.0733	-9.70525	-0.193574	-0.642018	-0.104003	-0.22946	-0.0931731	-0.560614	-0.693239	-0.934154	-0.743114	-0.156997	-0.684518	-0.385469
P52564	MEK6 (MAP2K6)	Pan-specific	0, 0	0, 0	0, 0	0, 0	-4.76606	-8.76626	-21.0075	-13.8362	-0.215131	-0.320807	-0.0638254	-0.121063	-0.114788	-0.411354	-0.623963	-0.804509	-0.175115	-0.0716283	-0.434289	-0.288877
P52564	MEK6 (MAP2K6)	S207	0, 0	0, 0	0, 0	0, 0	-40.297	-26.1852	98.8402	-6.48852	0.403253	-0.502859	0.569216	0.145481	0.0152952	0.660573	0.033216	-0.086445	-1.50152	-0.530265	0.944941	-0.19146
O14733	MEK7 (MAP2K7)	Pan-specific	4, 4	4, 4	4, 4	0, 0	-36.66	-39.7435	-26.4174	344.462	-8.18772	-9.59239	-6.10464	-6.62699	-6.19606	-8.71578	-1.73529	-0.253445	-2.32767	-0.653668	-3.68986	2.37098
Q13233	MEKK1 (MAP3K1)	Pan-specific	0, 0	0, 0	0, 3	0, 0	-39.0273	-33.9076	-54.7389	-2.39795	0.3992	-0.383504	0.306124	-0.252395	0.580142	-0.300942	-0.361688	-0.530357	-1.29702	-0.698935	-1.29025	-0.269875
Q13233	MEKK1 (MAP3K1)	Pan-specific	0, 0	0, 0	0, 0	0, 0	-21.6152	-38.127	-28.0492	-17.0402	-0.0163967	-0.430212	0.272695	-0.35257	0.151504	-0.357562	-0.194459	-0.639742	-0.685732	-0.782463	-0.745473	-0.712461
Q13233	MEKK1 (MAP3K1)	Pan-specific	0, 0	0, 0	0, 0	0, 0	-19.0077	-20.8987	-16.2509	-29.9958	-0.331245	-0.641824	-0.365319	-0.573738	-0.491365	-0.872759	-0.639773	-1.03603	-0.51466	-0.260817	-0.558511	-0.634015
Q13233	MEKK1 (MAP3K1)	Pan-specific	4, 4	4, 4	4, 4	0, 0	-36.66	-39.7435	-26.4174	181.554	-8.18772	-9.59239	-6.10464	-6.62699	-6.19606	-8.71578	-1.54002	-0.274843	-2.32767	-0.653668	-3.68986	2.02431
Q9Y2U5	MEKK2 (MAP3K2)	Pan-specific	0, 0	0, 0	0, 0	0, 0	-30.7904	-23.6222	-34.5095	-14.359	0.120295	-0.450451	0.185448	-0.132214	0.243734	-0.390799	-0.404438	-0.641691	-0.94578	-0.397525	-0.929207	-0.379609
Q9Y2U5	MEKK2 (MAP3K2)	Pan-specific	4, 4	2, 4	4, 2	0, 0	-36.66	-39.7435	-26.4174	98.4841	-8.18772	-9.59239	-6.10464	-6.62699	-6.19606	-8.71578	-0.616304	0.214545	-2.32767	-0.653668	-3.68986	1.32937
Q9Y6R4	MEKK4 (MAP3K4)	Pan-specific	0, 0	0, 0	0, 0	0, 0	-12.3304	-26.9399	-59.5476	-10.9082	-0.154602	-0.393502	0.0391593	-0.352817	0.538835	-0.424838	-0.39991	-0.562677	-0.39588	-0.490523	-1.4112	-0.260431
P08581	Met	Pan-specific	0, 0	2, 2	2, 2	0, 2	-17.7176	-28.565	8.87474	-81.1707	-1.20796	-1.43321	-1.05293	-1.1545	-1.70118	-1.59775	-0.995209	-2.67708	-0.373264	-0.127108	0.151467	-2.69102
P08581	Met	Y1003	0, 0	0, 0	0, 0	0, 0	-35.1424	-34.2811	-32.7837	-18.2929	2.02671	1.49029	1.83299	1.32309	1.68427	1.56848	1.33459	1.19287	-0.888907	-0.638092	-0.169554	-0.226757
P28562	MKP1	Pan-specific	4, 4	4, 4	4, 4	0, 0	-36.66	-39.7435	-26.4174	258.882	-8.18772	-9.59239	-6.10464	-6.62699	-6.19606	-8.71578	-2.16392	-0.630647	-2.32767	-0.653668	-3.68986	2.45327
Q13115	MKP2	Pan-specific	0, 0	0, 0	0, 0	0, 0	-27.8112	-25.505	-16.9806	8.4794	1.58127	1.19424	1.38183	1.05235	1.31467	1.41041	1.05281	1.23315	-0.641348	-0.41232	0.140196	0.288548
P19105	MLC(MLRC2)	S19	0, 0	0, 0	0, 0	0, 0	-13.4189	-29.4883	-42.1682	-12.4339	1.72055	1.59882	1.68464	1.26166	1.91823	1.71392	1.46964	1.4423	-0.201711	-0.529322	-0.299178	-0.0437446
P19105	MLC(MLRC2)	S19	0, 0	0, 1	0, 0	0, 0	-12.4055	-13.6729	-9.35421	-22.9704	-0.320021	-0.487015	-0.603438	-0.61368	-0.600189	-0.832167	-0.74663	-0.992297	-0.276725	-0.0128178	-0.339707	-0.393073
Q16584	MLK3	Pan-specific	4, 4	4, 4	4, 4	0, 0	-36.66	-39.7435	-26.4174	384.837	-8.18772	-9.59239	-6.10464	-6.62699	-6.19606	-8.71578	-2.17833	-0.339889	-2.32767	-0.653668	-3.68986	2.94155
Q16584	MLK3	T277+S281	0, 0	1, 0	0, 0	0, 0	-34.3863	-51.7365	-27.5551	-8.6911	1.94872	1.43976	1.98308	1.18255	1.64282	1.64019	1.33505	1.33925	-0.843397	-1.00179	-0.00384749	0.00671992
Q9Y3A3	mMOB1	Pan-specific	0, 0	0, 0	0, 0	0, 0	-28.9916	-28.0752	-7.24938	11.8023	1.28598	0.853567	1.21647	0.820946	1.09549	1.27303	1.15718	1.38606	-0.716548	-0.494958	0.259984	0.366219
P04179	Mn SOD	Pan-specific	0, 0	0, 0	0, 0	0, 0	-9.13123	-19.4556	-16.5396	-20.104	-0.381708	-0.632067	-0.215656	-0.508919	-0.307012	-0.809066	-0.766402	-1.23551	-0.414869	-0.366992	-0.735206	-0.750582
Q9BUB5	Mnk1	T250+T255	0, 0	0, 0	0, 0	0, 0	-13.1798	-42.3431	-21.012	-43.9448	0.935543	0.767927	0.654438	0.0924475	0.627539	0.447432	0.397594	-0.361449	-0.277756	-0.703281	-0.263748	-1.21449
Q9HBH9	Mnk2	Pan-specific	4, 4	4, 4	4, 4	0, 0	-36.66	-39.7435	-26.4174	285.305	-8.18772	-9.59239	-6.10464	-6.62699	-6.19606	-8.71578	-2.11891	-0.57835	-2.32767	-0.653668	-3.68986	2.46492
P00540	Mos	Pan-specific	0, 0	0, 1	0, 0	0, 0	-52.1899	-80.922	-49.3296	-45.8947	0.00823353	-1.15711	0.679731	-0.814136	-0.0977668	-1.1891	-0.779683	-1.48347	-1.93109	-1.86944	-1.59814	-1.12608
P43246	MSH2	Pan-specific	0, 0	0, 0	0, 0	0, 0	-30.1341	-33.7126	-8.82108	8.59322	1.5888	1.14739	1.35299	0.90803	1.27963	1.47938	1.0304	1.20457	-0.731462	-0.556822	0.292512	0.278673
O75582	Msk1	S376	3, 0	2, 2	2, 2	2, 2	-34.1934	-37.0319	-30.8517	-79.8124	-0.825098	-1.53392	-0.932321	-1.37588	-0.860713	-1.72174	-1.24367	-6.18668	-1.17459	-0.55507	-1.26088	-7.90891
Q13043	MST1	Pan-specific	0, 0	0, 0	0, 2	0, 0	7.54738	36.7603	-59.604	40.7003	-0.719807	-0.593281	-0.966388	-0.288739	-0.956468	-1.20975	-0.884654	-0.578431	0.209666	0.848017	-0.370902	0.489963
Q13043	MST1	Pan-specific	0, 0	0, 0	0, 0	0, 0	-39.9868	-37.7847	-9.09043	-5.55871	1.7091	1.0447	1.42109	0.899385	1.22547	1.41319	1.15322	1.19279	-1.10098	-0.652861	0.274898	0.063322
Q13043	MST1	Pan-specific	4, 4	0, 2	4, 2	0, 0	-36.66	-28.4417	-26.4174	59.1089	-8.18772	-9.59239	-4.53497	-4.67568	-6.19606	-8.71578	-0.763572	-0.260997	-2.32767	-0.176085	-3.68986	0.80413
Q13043	MST1	Pan-specific	0, 0	1, 0	0, 0	0, 2	-35.2513	-56.9882	-28.4169	-50.2121	-0.213261	-0.873579	-0.115904	-0.906548	-0.436597	-1.01325	-1.03407	-2.26264	-1.09421	-0.989419	-0.844447	-1.96574
Q13188	MST2	Pan-specific	0, 0	0, 0	0, 0	0, 0	-23.281	-28.7479	-21.5689	25.265	0.290212	-0.0501211	0.72467	0.352394	0.650757	0.497169	0.742239	1.04597	-0.563965	-0.465869	-0.224913	0.485979
Q9Y6E0	MST3	Pan-specific	0, 0	0, 0	0, 0	0, 0	-10.2803	-17.5688	-28.3233	15.4545	1.32994	1.25945	1.05618	0.895398	1.35224	1.30155	1.02115	1.27891	-0.116805	-0.201206	-0.0742286	0.412416
P42345	mTOR (FRAP)	Pan-specific	0, 0	0, 0	0, 0	0, 0	-39.5147	-45.8569	-39.2878	-37.9932	0.482934	-0.402969	0.499944	-0.237187	0.522846	-0.172096	-0.23155	-0.807067	-1.46803	-0.922452	-1.01767	-0.920839
P42345	mTOR (FRAP)	S2448	0, 0	0, 0	0, 0	0, 0	-40.0313	-53.087	-45.5725	-41.6949	0.90245	0.150913	0.760052	-0.1145	0.672622	-0.060127	0.277607	-0.448542	-1.24537	-1.09442	-1.07303	-1.16185
O14974	MYPT1	T696	0, 0	0, 1	0, 0	0, 0	-31.3375	-5.68161	-7.89638	-17.1603	0.52146	-0.0723401	0.400085	0.211853	0.386495	0.290629	-0.211061	-0.514279	-0.983985	-0.235556	-0.140385	-0.485154
P51955	Nek2	Pan-specific	0, 0	0, 0	0, 0	0, 0	-22.5851	-31.1572	-25.2883	-16.6474	-0.133313	-0.641631	-0.0739497	-0.56975	-0.19249	-0.70087	-0.545933	-0.761429	-0.842333	-0.62045	-0.744469	-0.344797
P51955	Nek2	Pan-specific	0, 0	0, 0	0, 0	0, 0	-17.8306	-18.7315	-9.94088	-6.88552	0.113881	-0.212465	-0.085353	-0.323848	-0.155241	-0.344928	-0.477261	-0.530236	-0.540787	-0.298454	-0.277775	-0.0847605
P51955	Nek2	Pan-specific	4, 4	2, 2	4, 4	0, 0	-36.66	-39.7435	-26.4174	300.955	-8.18772	-9.59239	-6.10464	-6.62699	-6.19606	-8.71578	-2.09963	-0.299367	-2.32767	-0.653668	-3.68986	2.88045
P51955	Nek2	Pan-specific	4, 4	4, 4	4, 4	0, 0	-36.66	-39.7435	-26.4174	104.696	-8.18772	-9.59239	-6.10464	-6.62699	-6.19606	-8.71578	-1.1627	-0.619481	-2.32767	-0.653668	-3.68986	0.869164
P51955	Nek2	Pan-specific	0, 0	0, 0	0, 3	0, 0	52.1075	56.6638	61.9969	-1.96914	-0.196469	0.221869	0.194684	0.600555	0.228208	0.848915	0.400726	0.367537	0.693228	0.50791	0.908961	-0.0531037
P51957	Nek4	Pan-specific	0, 0	0, 0	0, 0	0, 0	65.6515	87.8565	40.803	-15.3728	-0.677539	-0.181841	-0.65882	-0.0987632	-0.607205	-0.463638	-0.426096	-0.73252	0.821419	0.70086	0.210238	-0.490284
Q8TDX7	Nek7	Pan-specific	0, 0	0, 0	0, 0	0, 0	64.168	95.6802	98.0984	5.29402	-0.723592	-0.174403	-0.729549	-0.0405426	-0.549801	0.103276	-0.491599	-0.439772	0.910061	0.862229	0.956363	0.0829243
P19838	NFkappaB p50	Pan-specific	0, 0	0, 0	0, 0	3, 0	-3.87624	117.144	17.2733	-36.9208	-1.27588	-1.62806	-0.906672	-0.346218	-0.282298	-0.386368	-0.0746222	-0.677178	-0.583597	0.701357	-0.152399	-0.964101
Q04206	NFkappaB p65	Pan-specific	2, 2	0, 2	0, 0	0, 0	-36.66	-10.1959	39.0601	43.7982	-8.18772	-9.59239	-1.0422	-1.21522	-1.28298	-1.30668	-0.107374	0.260264	-2.32767	-0.216526	-0.0347074	0.588228
Q99558	NIK	Pan-specific	4, 4	2, 4	4, 4	0, 0	-36.66	-39.7435	-26.4174	123.767	-8.18772	-9.59239	-6.10464	-6.62699	-6.19606	-8.71578	-1.45331	-0.415898	-2.32767	-0.653668	-3.68986	1.65989
Q9UBE8	Nlk	Pan-specific	4, 4	4, 4	2, 2	0, 0	-36.66	-39.7435	-26.4174	101.388	-8.18772	-9.59239	-6.10464	-6.62699	-6.19606	-8.71578	-1.1987	-0.380167	-2.32767	-0.653668	-3.68986	1.30967
Q13224	NMDAR2B	Y1474	0, 0	0, 0	0, 2	0, 0	78.5916	7.24464	50.0757	-54.1028	-1.0763	-0.710897	-0.647843	-0.737637	-0.977727	-0.898971	-0.308561	-1.25155	0.605508	-0.11237	0.11533	-1.5088
Q9Y5B8	NME7	Pan-specific	0, 0	0, 0	0, 0	0, 0	29.5145	52.0358	89.4425	-23.5052	-0.460053	-0.168848	-0.609335	-0.20349	-0.544816	0.138399	-0.470394	-0.891764	0.482555	0.507878	1.0005	-0.674202
Q05586	NR1	S896	0, 0	2, 2	2, 2	2, 2	-35.8644	46.184	-16.7842	-56.7947	-0.866297	-1.58116	-1.83055	-1.43025	-1.74858	-2.48454	-2.34832	-3.48792	-1.1846	0.500938	-1.07774	-1.82338
Q16236	Nrf2	Pan-specific	0, 0	0, 0	0, 0	0, 0	64.6458	24.6156	23.6888	5.06195	-1.12952	-0.573815	-0.260025	-0.0873308	-0.226533	-0.0587127	0.247647	0.299973	0.920865	0.216112	0.245755	0.083723
P21589	NT5E	Pan-specific	0, 0	0, 0	0, 0	0, 0	56.5795	49.3603	28.1216	13.5061	-0.845942	-0.304143	-0.0906461	0.326247	-0.137116	0.138965	0.740881	0.939673	0.897814	0.521704	0.404291	0.318072
P28749	p107	Pan-specific	2, 0	0, 0	0, 0	0, 0	-28.3708	119.932	26.8622	17.7549	-1.46272	-2.29652	-0.663722	-0.149327	-0.297504	-0.287553	0.0617792	0.263674	-1.38168	0.643719	0.0145723	0.323037
P42773	p18 INK4c	Pan-specific	0, 0	0, 0	0, 0	0, 0	39.0298	-1.09419	-4.04785	-21.8681	1.24131	1.73494	1.17416	1.09328	1.19235	1.42894	1.3152	1.10347	0.817999	-0.101213	0.346454	-0.33878
P38936	p21 CDKI1	Pan-specific	2, 0	0, 0	0, 0	0, 0	13.7547	55.1712	29.0076	-1.99081	-1.68952	-1.74196	-0.400239	-0.0226529	-0.386565	-0.28265	0.768274	0.838613	-0.0868988	0.472515	0.152172	0.112543
P46527	p27 Kip1	Pan-specific	4, 4	2, 2	2, 2	0, 0	-36.66	-96.3344	-26.4174	127.214	-8.18772	-9.59239	-4.52627	-6.62699	-6.19606	-8.71578	-1.28348	-0.299895	-2.32767	-2.62886	-3.68986	1.57376
P46527	p27 Kip1	T187	0, 0	2, 2	2, 2	2, 2	66.1551	69.706	3.46469	-69.117	-2.16854	-1.63603	-1.91446	-1.35742	-1.93208	-2.36474	-1.78487	-3.05148	0.882416	0.69708	-0.633595	-2.02661
Q15078	p35, p25	Pan-specific	4, 4	2, 4	2, 2	0, 0	-36.66	-39.7435	-26.4174	280.04	-8.18772	-9.59239	-6.10464	-6.62699	-6.19606	-8.71578	-1.59688	-0.164281	-2.32767	-0.653668	-3.68986	2.2922
Q16539	p38a MAPK	T180+Y182	0, 0	0, 0	0, 0	0, 0	51.9736	6.24904	-3.56106	-28.4312	-1.15317	-0.961586	-0.646422	-0.735803	-0.657059	-1.04818	-0.624831	-1.11894	0.317481	-0.111852	-0.572761	-0.790582
Q16539	p38a MAPK	T180+Y182	0, 0	2, 2	2, 2	2, 2	-8.99367	58.3558	70.1105	-59.3665	-1.31574	-1.64415	-1.46692	-1.33978	-1.60831	-1.7215	-1.25156	-2.46541	-0.544195	0.15911	-0.165759	-1.94219
Q16539	p38a MAPK	T180+Y182	0, 0	0, 0	0, 0	0, 0	65.7655	10.8431	30.6141	2.91501	0.428507	1.08605	0.892521	0.951325	0.665713	1.09133	1.15835	1.26681	1.08961	0.0735876	0.623275	0.173544
Q16539	p38a MAPK	T180+Y182	0, 0	0, 0	0, 2	0, 0	33.8638	11.8556	14.358	-21.2272	-1.31944	-1.0635	-0.952072	-0.920415	-1.05101	-1.33067	-0.433039	-0.785547	0.424112	0.0396162	-0.409535	-0.56402
Q16539	p38a MAPK	T180+Y182	0, 0	0, 2	0, 0	3, 2	44.4384	-16.4985	-11.0301	-19.0997	-1.37186	-0.594247	-0.16276	-0.440042	0.184087	-0.215421	-0.888653	-1.06575	1.28859	-0.346993	-0.585038	-0.283355
Q16539	p38a MAPK	Pan-specific	0, 0	0, 0	0, 0	0, 0	74.4431	8.79279	-7.7356	-8.60218	-0.842112	-0.375389	-0.490577	-0.441277	-0.383004	-0.726941	-0.614794	-0.773447	0.773405	0.0616952	-0.503659	-0.253848
Q16539	p38a MAPK	Pan-specific	2, 3	2, 2	2, 2	2, 2	64.536	22.0262	-1.58224	-75.368	-2.0461	-1.62449	-1.91943	-1.81073	-1.75047	-2.51547	-1.39155	-3.46193	0.698654	0.136028	-1.12026	-3.31266
Q16539	p38a MAPK	Pan-specific	0, 0	0, 0	0, 0	0, 0	39.9534	-13.1719	88.8139	14.4627	-0.562271	-0.204399	0.134293	-0.0418481	-0.15923	0.519139	-0.284941	-0.146416	0.593029	-0.220425	0.993399	0.221643
Q16539	p38a MAPK	Pan-specific	0, 0	0, 2	0, 0	0, 0	90.0796	2654.06	205.014	42.1195	-1.47591	-0.660228	-5.45086	-1.31808	-1.34113	-0.00614645	0.435553	0.875805	1.35166	5.17179	1.95494	0.704412
Q16539	p38a MAPK	Pan-specific	0, 0	0, 0	0, 0	0, 0	28.1831	3.81849	-11.0373	-26.2354	-1.26599	-0.989987	-0.64326	-0.761808	-0.557707	-1.12013	-0.952836	-1.22601	0.457368	-0.148351	-0.823605	-0.437082
Q16539	p38a MAPK	Pan-specific	0, 0	0, 0	0, 0	0, 0	21.9283	17.6207	-0.0877274	-26.1829	-0.160348	-0.0309933	-0.419778	-0.267427	-0.35213	-0.491547	-0.349576	-0.733007	0.214353	0.190654	-0.204163	-0.613498
Q16539	p38a MAPK	Pan-specific	0, 0	0, 0	0, 0	0, 0	60.6012	32.3228	21.6316	-20.5304	0.871139	1.51545	0.967939	1.20393	0.938522	1.41215	1.94189	1.80894	1.06769	0.295324	0.693581	-0.212722
Q16539	p38a MAPK	Pan-specific	0, 0	0, 0	0, 0	0, 0	62.2422	5.55895	19.4556	-14.2673	-0.775169	-0.241495	-0.304644	-0.286375	-0.497205	-0.435587	-0.365649	-0.572544	0.88435	0.0228622	0.0902335	-0.331035
O15264	p38d MAPK	Pan-specific	0, 0	0, 0	0, 0	0, 0	71.6012	71.9676	40.2859	15.7159	-1.01341	-0.318392	-0.44571	0.0913183	-0.351916	-0.0382519	0.283115	0.474769	1.15171	0.672043	0.459328	0.30665
P53778	p38g MAPK (Erk6)	Pan-specific	0, 0	0, 0	0, 0	0, 0	61.9043	-11.214	18.6146	-22.7233	-0.397075	0.148353	0.442146	0.238669	0.259473	0.38902	-0.00161066	-0.274802	0.903827	-0.254632	0.189707	-0.437112
P53778	p38g MAPK (Erk6)	Pan-specific	0, 0	0, 0	0, 0	0, 0	66.6068	21.5486	9.47321	-26.3996	-1.01777	-0.450257	-0.628909	-0.452815	-0.469999	-0.561133	-0.482619	-0.89014	0.940432	0.220365	-0.133456	-0.652043
P04637	p53	Pan-specific	2, 2	2, 2	2, 2	0, 0	-36.66	156.434	29.8823	70.8168	-8.18772	-9.59239	-6.10464	-6.62699	-3.94576	-5.21483	-0.654752	-0.122663	-2.32767	-0.653668	-1.85842	0.851355
P04637	p53	S392	0, 0	0, 0	0, 0	0, 0	87.8197	36.4579	85.9158	-3.83444	-0.634959	0.102321	-0.430897	-0.186623	-0.68836	-0.160074	-0.511937	-0.558333	1.22175	0.305686	0.773619	-0.0742347
P04637	p53	S392	0, 0	0, 0	0, 0	0, 0	82.0632	36.6068	17.8284	-17.0239	0.184298	0.993499	0.262145	0.540323	0.447673	0.729734	0.756577	0.537704	1.34092	0.348115	0.413049	-0.350202
P04637	p53	S392	0, 0	0, 0	2, 0	0, 0	-7.04985	16.5133	-5.15799	-23.004	-0.709295	-1.03728	-0.910473	-0.815865	-0.544709	-1.10221	-0.888653	-1.10992	-0.543495	0.118394	-0.816404	-0.354038
O15350	p73	Pan-specific	0, 0	0, 0	0, 0	0, 0	56.0875	48.3894	26.1371	-1.92032	1.34383	1.96394	1.10602	1.46353	1.21881	1.84263	1.82968	1.93327	1.02757	0.447383	0.91352	0.165749
Q05923	PAC1	Pan-specific	4, 4	2, 2	4, 4	0, 3	-36.66	-39.7435	-26.4174	77.8297	-8.18772	-9.59239	-6.10464	-6.62699	-6.19606	-8.71578	-1.59198	-0.522724	-2.32767	-0.653668	-3.68986	1.71083
Q9BY11	PACSIN1	Pan-specific	0, 0	0, 0	0, 0	0, 0	63.8216	76.5933	54.5017	36.8736	-0.753567	-0.184884	-0.482513	0.081756	-0.32998	0.0725379	-0.26581	0.132811	0.942363	0.706132	0.589445	0.637803
Q13153	PAK1	Pan-specific	4, 4	2, 2	2, 2	3, 0	-36.66	-97.5151	-26.4174	41.5456	-8.18772	-9.59239	-4.99607	-6.62699	-6.19606	-8.71578	-0.520955	-0.17362	-2.32767	-2.04094	-3.68986	0.555743
Q13153	PAK1	Pan-specific	0, 0	0, 0	2, 2	2, 2	19.6538	59.6722	59.4941	-10.0386	-1.20284	-1.11968	-1.32451	-0.830155	-1.26375	-1.38499	-1.58904	-1.45939	0.137799	0.618637	-0.177539	0.20743
Q13153	PAK1	Pan-specific	4, 4	4, 4	4, 2	0, 0	-36.66	-39.7435	-26.4174	527.556	-8.18772	-9.59239	-6.10464	-6.62699	-6.19606	-8.71578	-2.57056	-0.623257	-2.32767	-0.653668	-3.68986	3.11573
Q13153	PAK1/2/3	S144/S141/S154	0, 0	0, 0	0, 0	0, 0	68.4548	-1.95999	13.0173	-39.9179	-0.0231667	0.588146	-0.153844	-0.151021	-0.0250154	0.0380281	0.0137086	-0.578431	1.013	0.0035328	0.0923205	-0.947436
Q13153	PAK1/2/3	T423/402/421	0, 0	0, 0	0, 0	0, 0	24.3921	143.166	12.4057	-33.4753	-0.808217	-0.66158	-1.2027	-0.188246	-0.405153	-0.36619	-0.0756787	-0.551024	0.242992	1.26949	0.0570574	-0.760563
Q13177	PAK2	Pan-specific	0, 0	2, 2	2, 2	2, 2	61.917	31.0129	105.915	-55.4955	-1.83895	-1.18324	-2.02615	-1.21921	-2.04941	-1.42836	-1.18621	-2.41125	1.08656	1.00981	0.909469	-1.96009
Q13177	PAK2	Pan-specific	4, 4	2, 2	4, 4	0, 0	-36.66	-39.7435	-26.4174	226.791	-8.18772	-9.59239	-6.10464	-6.62699	-6.19606	-8.71578	-1.19364	0.0316284	-2.32767	-0.653668	-3.68986	1.96046
O75914	PAK3	Pan-specific	4, 4	2, 2	2, 2	0, 0	-36.66	882.471	-26.4174	333.962	-8.18772	-9.59239	-6.10464	-6.62699	-6.19606	-8.71578	-1.36902	0.0406423	-2.32767	-0.653668	-3.68986	2.25549
Q9P286	PAK5	Pan-specific	3, 3	0, 0	3, 3	0, 0	21.5535	105.302	11.0548	27.4492	-0.78136	-0.626996	-0.180949	0.532419	0.0676776	0.146461	0.91509	1.23072	0.255797	0.892715	0.11537	0.505008
Q9NQU5	PAK6	Pan-specific	0, 0	0, 0	0, 0	0, 0	85.5682	57.0993	72.2125	30.357	-1.01835	-0.346746	-0.349227	0.0961877	-0.493965	-0.0198184	0.63425	0.966228	1.11292	0.557396	0.694337	0.531171
P09874	PARP1	Pan-specific	0, 0	0, 0	0, 0	0, 0	54.3226	38.205	44.1294	-10.8955	-0.925222	-0.552175	-0.712355	-0.428327	-0.497526	-0.333613	-0.333577	-0.61002	0.618175	0.355435	0.240033	-0.442315
P09874	PARP1	Pan-specific	0, 0	0, 0	0, 0	0, 0	80.0411	18.733	5.1682	-23.8551	0.0729937	0.802415	-0.411962	-0.249325	0.0535404	0.0521243	0.599423	0.311383	1.20872	0.203526	-0.0020737	-0.460871
Q02962	Pax2	S394	0, 0	0, 0	0, 0	0, 0	87.2508	101.155	96.5025	-28.5277	-1.68346	-0.955838	-1.48295	-0.788589	-1.66037	-1.38027	-1.10588	-1.6134	1.20574	0.868924	0.41018	-0.812049
P49023	Paxillin	Pan-specific	0, 0	0, 0	0, 0	0, 0	71.6954	98.592	78.3079	5.69669	0.146484	0.861585	0.112694	0.802033	0.200895	0.95881	0.828796	0.944383	1.18499	0.862645	1.10989	0.184942
P49023	Paxillin 1	Y31	0, 0	0, 0	0, 0	0, 0	81.9519	66.7492	28.2563	8.97661	0.27685	1.06967	0.280475	0.747623	0.444219	0.829728	0.861321	1.0169	1.31378	0.584594	0.564537	0.248929
P49023	Paxillin 1	Y118	0, 0	0, 0	0, 0	0, 0	58.4364	-22.9091	14.3605	-57.1331	-0.526639	-0.0964913	-0.0291893	-0.369401	0.0350231	0.105351	0.491283	-0.441477	0.712798	-0.425744	0.102987	-1.49244
P49023	Paxillin 1	Y118	0, 0	0, 0	0, 0	0, 0	18.5687	59.8982	23.6477	-18.3096	-0.531272	-0.442674	-0.67033	-0.149609	-0.523557	-0.419746	-0.38927	-0.658094	0.146815	0.651635	0.152019	-0.430125
P12004	PCNA	Pan-specific	0, 0	0, 0	0, 0	0, 0	32.075	198.172	2.72825	-34.4361	-0.728581	-0.429004	-0.724362	0.313968	0.0600214	-0.0381576	0.721562	0.200821	0.496428	1.29938	-0.143773	-0.833196
Q00536	PCTK1 (PCTAIRE1)	Pan-specific	0, 0	0, 0	0, 0	0, 1	105.682	122.854	67.5729	19.3353	-1.08743	-0.187396	-0.678323	0.146399	-0.634553	-0.112599	-0.43002	-0.246583	1.49145	1.03206	0.764347	0.293503
P16234	PDGFRa	Y754	0, 0	0, 0	0, 0	0, 0	95.2879	54.2411	30.1345	-33.0887	0.669554	1.59428	0.886766	1.27898	0.891517	1.45807	1.59208	1.2308	1.53237	0.490824	0.829659	-0.578058
P16234	PDGFRa/b	Y572+Y574/Y579+Y581	0, 0	0, 0	0, 0	0, 0	51.382	37.0029	16.0134	-34.5391	-0.753478	-0.347084	-0.423508	-0.147104	-0.33931	-0.33399	0.281719	-0.102889	0.673436	0.345894	0.00779038	-0.615382
P09619	PDGFRb	Y716	0, 0	0, 0	0, 0	0, 0	29.4054	24.6867	-9.2191	-31.5771	-0.357256	-0.10818	-0.175762	-0.0186657	-0.0166471	-0.260633	0.000502335	-0.397504	0.412743	0.196592	-0.357292	-0.636819
P07237	PDI	Pan-specific	0, 0	0, 0	0, 0	0, 0	80.1141	84.4659	73.6776	16.7209	0.224294	0.989683	0.407048	0.955348	0.427304	1.20038	1.56899	1.85084	1.26832	0.686148	1.13209	0.45098
O15530	PDK1	Pan-specific	0, 0	3, 0	0, 0	2, 0	38.5448	112.681	25.024	-4.4148	-1.28127	-0.973565	-1.00166	-0.421941	-1.18437	-1.29833	-1.40521	-1.5298	0.509897	0.725471	-0.166883	-0.199353
O15530	PDK1	Pan-specific	4, 4	2, 2	0, 2	0, 0	-36.66	-39.7435	508.747	48.9617	-8.18772	-9.59239	-6.10464	-6.62699	-4.53998	-2.24556	-0.572232	-0.0621238	-2.32767	-0.653668	3.35993	0.816185
O15530	PDK1	S241	0, 0	2, 2	2, 0	2, 2	12.2364	5.46415	254.098	-76.7452	-1.30755	-1.38322	-1.70373	-1.77301	-2.38671	-1.60605	-1.57477	-3.43274	-0.12539	-0.0867018	1.1432	-2.97278
Q15121	PED15 (PEA15)	S116	0, 0	0, 0	0, 0	0, 0	67.3232	42.5766	13.2585	-11.5031	-0.772853	-0.252942	-0.208657	0.0588912	-0.321754	-0.382643	0.364013	0.259939	0.861542	0.334813	-0.0891657	-0.166521
Q9H230	PERP	Pan-specific	0, 0	0, 0	0, 0	0, 0	95.9143	36.454	0.961316	-45.0695	-0.00245591	0.735709	0.373833	0.548086	0.639041	0.673302	1.1085	0.455158	1.22321	0.218062	0.0501709	-1.04537
P27986	PI3K	Pan-specific	0, 0	0, 0	0, 0	0, 0	83.7575	68.4304	50.4167	0.0327805	0.29814	1.09363	0.524953	1.00743	0.441655	1.00963	1.19517	1.28338	1.3182	0.603775	0.831742	0.141127
O00329	PI3K p110 delta	Pan-specific	0, 0	0, 0	0, 0	0, 0	78.5804	116.925	34.7728	18.0504	-0.503212	0.165694	-0.325319	0.364355	-0.240243	-0.0531496	0.826759	1.06538	1.10844	0.863065	0.273978	0.381799
P27986	PI3K p85/p55	Y467/Y199	0, 3	2, 0	2, 2	2, 2	23.9225	171.389	65.0455	-33.2443	-1.47689	-1.41877	-1.92689	-1.30993	-1.84661	-2.26876	-2.8348	-3.15526	0.0963097	0.772073	-0.618186	-0.512744
Q99570	PI3KR4	Pan-specific	0, 0	0, 0	0, 0	0, 0	38.9353	57.6074	13.6062	-0.767801	-0.708716	-0.445427	-0.695339	-0.23814	-0.560769	-0.613086	-0.542462	-0.598895	0.436296	0.572143	-0.076613	-0.0902944
Q5VWC1	PI4KCB	Pan-specific	0, 0	0, 0	0, 0	0, 0	82.8502	109.332	60.1028	0.131664	-1.52205	-0.852664	-1.24607	-0.560082	-1.08082	-0.930935	-0.798059	-0.91438	1.10924	0.858452	0.219488	-0.186117
P48426	PIP5K2a	Pan-specific	0, 0	3, 0	0, 0	0, 0	156.414	68.2269	78.1664	27.7578	-1.13563	0.0645486	-0.608162	-0.12438	-0.623621	-0.124715	-0.728217	-0.392794	1.98881	0.60541	0.730595	0.536683
P21127	PITSLRE	Pan-specific	4, 4	2, 4	4, 4	0, 0	-36.66	-39.7435	-26.4174	147.881	-8.18772	-9.59239	-6.10464	-6.62699	-6.19606	-8.71578	-1.41871	-0.46121	-2.32767	-0.653668	-3.68986	1.53202
P17612	PKA Ca/b	Pan-specific	0, 0	0, 0	0, 0	0, 0	89.5731	49.3167	48.7677	3.67457	0.373679	1.19299	0.55355	0.900797	0.551405	1.13937	1.25272	1.3997	1.35767	0.434548	0.861018	0.235186
P17612	PKA Ca/b	Pan-specific	0, 0	0, 0	0, 0	0, 0	84.7058	69.4803	33.5455	-18.5681	-0.73495	-0.0397844	-0.226526	0.285987	-0.140748	0.13062	0.783291	0.581839	1.15196	0.641364	0.39739	-0.322328
P17612	PKA Ca/b	T198	0, 0	0, 0	0, 0	0, 0	86.1832	84.8009	40.4057	-18.9823	0.569697	1.42209	0.824457	1.39627	0.836998	1.48169	1.44945	1.29162	1.41249	0.715574	0.944084	-0.252533
P22694	PKA Cb	S339	0, 0	0, 0	0, 0	0, 0	112.949	50.6913	38.5551	-24.5021	-0.856275	0.112609	-0.327592	0.0417779	-0.413735	-0.164835	0.389407	0.125584	1.60554	0.462234	0.364487	-0.422122
P10644	PKA R1a	Pan-specific	0, 0	0, 0	0, 0	0, 0	50.8323	90.5024	30.6236	35.07	-0.450923	0.0625199	-0.517185	0.10822	-0.33582	-0.180204	-0.0967709	0.324579	0.850824	0.782638	0.227883	0.674169
P13861	PKA R2a	Pan-specific	0, 0	0, 0	0, 0	0, 0	148.273	54.0346	30.6918	-10.6495	-1.05915	0.0381756	-0.60088	-0.290538	-0.534382	-0.455765	-0.295619	-0.557724	1.81838	0.388364	0.115127	-0.419373
P13861	PKA R2a	S99	0, 0	0, 0	0, 0	0, 0	25.0144	62.8638	-3.40188	-21.1467	-0.418097	-0.270911	-0.623047	-0.182671	-0.331226	-0.568723	-0.389572	-0.702392	0.243902	0.55109	-0.347789	-0.500519
P31749	PKBa (Akt1)	Pan-specific	4, 4	2, 2	2, 2	0, 0	-36.66	-27.2143	-70.4342	80.4464	-8.18772	-9.59239	-1.68998	-4.0343	-3.80196	-6.89449	-0.461489	0.244347	-2.32767	-2.9337	-4.52868	1.12935
P31749	PKBa (Akt1)	Pan-specific	0, 0	0, 0	0, 0	0, 0	147.785	126.178	56.4447	-30.6472	-0.768176	0.368805	-0.961308	-0.149115	-0.69769	-0.383445	-0.403231	-0.861718	1.88409	1.01639	0.460178	-0.73359
P31749	PKBa (Akt1)	T308	0, 0	0, 0	0, 0	0, 0	93.1791	84.7627	46.7999	1.41556	0.307538	1.16159	0.416923	0.995855	0.481609	1.03594	1.35784	1.44567	1.41525	0.72448	0.811756	0.14053
P31749	PKBa (Akt1)	T308	0, 0	0, 0	0, 0	0, 0	81.5836	65.375	43.3995	-24.6845	-0.118258	0.624904	-0.344715	0.0374378	-0.0688515	0.258571	0.382238	0.0606596	1.23149	0.47823	0.479475	-0.514531
P31749	PKBa (Akt1)	S473	0, 0	0, 0	0, 0	0, 0	-11.5777	125.876	10.9187	-25.6524	-0.238336	-0.546427	-0.634308	0.185742	-0.156666	-0.144422	-0.152501	-0.552567	-0.510537	1.02622	0.0179305	-0.640114
P31749	PKBa (Akt1)	S473	0, 0	0, 0	0, 0	0, 0	53.4135	77.6663	20.5784	-43.5078	-0.609572	-0.111803	-0.352459	0.232883	-0.19833	-0.136784	0.100907	-0.546923	0.824851	0.732503	0.0901269	-1.03654
P31751	PKBb (Akt2)	Pan-specific	0, 0	0, 0	0, 0	0, 0	161.089	125.139	90.9749	27.9283	-0.926247	0.281909	-1.01349	-0.115524	-0.643491	-0.0333017	-0.459602	-0.159612	2.00203	1.12373	0.893558	0.479991
P31751	PKBb (Akt2)	Pan-specific	0, 0	2, 2	0, 2	2, 2	48.6406	150.536	64.2452	-35.6504	-1.87712	-1.48484	-2.08998	-1.03245	-1.59585	-1.50233	-0.988719	-1.73436	0.650034	1.32341	0.136949	-1.19304
P31751	PKBb (Akt2)	Pan-specific	0, 0	0, 0	0, 0	0, 0	80.5996	108.831	46.0527	-6.55487	-1.09759	-0.478321	-1.11143	-0.390784	-0.795439	-0.643353	-0.64464	-0.727891	1.02619	0.901828	0.222714	-0.133203
P31751	PKBb (Akt2)	Pan-specific	0, 3	0, 0	0, 0	0, 0	57.8446	166.376	45.974	-16.2253	-1.50285	-1.0393	-1.77584	-0.642191	-1.25869	-1.06464	-0.929366	-1.2537	0.768146	1.41866	0.284171	-0.51894
P31751	PKBb (Akt2)	Pan-specific	4, 4	2, 2	4, 2	0, 0	-36.66	-39.7435	-26.4174	52.2076	-8.18772	-9.59239	-6.10464	-6.62699	-6.19606	-8.71578	-0.739687	-0.274396	-2.32767	-0.653668	-3.68986	0.744476
P31751	PKBb (Akt2)	Pan-specific	4, 4	2, 2	2, 4	0, 0	-36.66	-39.7435	-26.4174	83.5048	-8.18772	-9.59239	-6.10464	-6.62699	-6.19606	-8.71578	-1.12033	-0.404407	-2.32767	-0.653668	-3.68986	1.14549
Q9Y243	PKBg (Akt3)	Pan-specific	0, 0	0, 0	0, 0	0, 0	16.712	38.96	15.291	-22.8855	-0.591355	-0.42002	-0.755979	-0.382668	-0.529325	-0.539871	-0.232531	-0.643112	0.283919	0.467164	-0.0154425	-0.656938
Q9Y243	PKBg (Akt3)	Pan-specific	0, 0	0, 0	0, 0	0, 0	61.8019	109.593	66.5164	-10.4157	-0.959651	-0.437119	-1.04692	-0.292338	-0.7651	-0.284865	-0.438586	-0.528408	0.865886	0.944293	0.703252	-0.143718
P17252	PKC	Pan-specific	0, 0	2, 2	2, 2	2, 2	77.693	55.6964	67.1444	-24.8365	-1.79098	-1.50943	-1.58128	-1.21409	-1.8334	-1.92866	-2.22829	-3.06918	0.466552	0.459496	-0.139491	-1.34544
P24723	PKC h	Pan-specific	4, 4	4, 4	4, 4	0, 0	-36.66	-39.7435	-26.4174	42.8115	-8.18772	-9.59239	-6.10464	-6.62699	-6.19606	-8.71578	-0.90684	-0.53527	-2.32767	-0.653668	-3.68986	0.59452
P17252	PKCa	Pan-specific	0, 0	0, 0	0, 0	0, 0	91.6888	88.7617	55.5035	-1.17044	0.337201	1.20052	0.435147	1.02694	0.515225	1.17506	1.28524	1.30461	1.43061	0.740576	0.966261	0.0309954
P17252	PKCa	S657	0, 0	0, 0	0, 0	0, 0	31.7506	65.9158	17.8814	-29.4545	-0.205021	0.0708762	-0.216366	0.201549	-0.0439244	0.0519357	0.175239	-0.285318	0.457188	0.522984	0.140377	-0.736902
P17252	PKCa/b2	T638/T641	0, 0	2, 2	2, 2	2, 2	8.31868	103.023	-10.922	-32.839	-1.14364	-1.28265	-1.83531	-1.46448	-1.46751	-2.25631	-2.04193	-2.86921	-0.23035	0.464063	-1.15512	-1.32366
P05771	PKCb1	Pan-specific	4, 4	4, 4	2, 4	0, 0	-36.66	-39.7435	-26.4174	4.98018	-8.18772	-9.59239	-6.10464	-6.62699	-6.19606	-8.71578	-0.51688	-0.487968	-2.32767	-0.653668	-3.68986	0.0462594
P05771	PKCb1	Pan-specific	0, 0	0, 0	0, 0	0, 0	32.132	21.4673	29.8602	-28.2484	-0.100576	0.176996	-0.286242	-0.134013	-0.192383	-0.0336318	0.410386	-0.0243631	0.459965	0.190501	0.232474	-0.695607
P05771	PKCb1/2	T500	0, 0	0, 0	0, 0	0, 0	51.4157	4.15706	6.30248	-7.08709	0.514201	1.03615	0.660548	0.674371	0.554325	0.730488	1.1754	1.17655	0.86492	0.0172982	0.257973	0.00183697
P05771-2	PKCb2	Pan-specific	0, 0	0, 0	0, 0	0, 0	6.66256	22.5925	18.5735	-6.47221	-0.516841	-0.626319	-0.602834	-0.395053	-0.526761	-0.610588	-0.892464	-0.81336	-0.181416	0.260019	-0.122755	0.126569
P05771-2	PKCb2	Pan-specific	0, 4	2, 0	2, 0	0, 0	-98.4887	-99.5865	36464.1	-5.35597	-3.24105	-9.59239	-1.53705	-6.62699	-6.19606	-4.47753	-0.185026	-0.324947	-10.5248	-6.3696	2.51661	-0.223876
P05771	PKCb2	T641	0, 0	0, 0	0, 0	0, 0	132.513	48.3963	173.541	5.4832	-1.19718	-0.247194	-0.881841	-0.343007	-1.68872	-0.889212	-0.364518	-0.256612	1.57422	0.674301	1.17079	0.172651
Q05655	PKCd	Pan-specific	4, 4	2, 2	4, 2	0, 0	-36.66	-97.7862	-93.8726	8.03126	-8.18772	-9.59239	-5.48165	-6.62699	-5.11872	-8.71578	-0.104204	-0.138295	-2.32767	-1.43328	-5.26753	-0.0545462
Q05655	PKCd	Y313	0, 0	0, 0	0, 0	0, 0	40.7141	23.1649	11.3768	-27.5132	0.97643	1.47063	0.929573	1.10792	0.95387	1.32192	1.51107	1.26523	0.818936	0.223186	0.538967	-0.393348
Q05655	PKCd	Y313	0, 0	0, 0	0, 0	0, 0	28.8792	-14.6647	-10.667	-24.784	1.02226	1.3931	1.10645	0.894375	1.03998	1.13603	1.43092	1.22536	0.614523	-0.26539	0.140657	-0.328914
Q05655	PKCd	T507	0, 0	2, 2	2, 2	2, 2	11.7829	33.9028	80.0151	-54.1392	-1.39685	-1.53141	-1.78178	-1.77979	-1.74192	-1.96736	-2.01299	-3.37886	-0.222977	0.00248855	-0.330137	-2.18541
Q05655	PKCd	S664	0, 0	0, 0	0, 0	0, 0	77.8315	41.8559	42.8011	-23.1876	0.0433305	0.801932	0.159942	0.492123	0.177143	0.646052	0.959613	0.730771	1.25708	0.415695	0.686668	-0.366153
Q02156	PKCe	Pan-specific	4, 4	4, 2	4, 2	0, 0	-36.66	-98.2542	-26.4174	32.9704	-8.18772	-9.59239	-4.36179	-6.62699	-6.19606	-8.71578	-0.430473	-0.210893	-2.32767	-2.83469	-3.68986	0.351333
Q02156	PKCe	Pan-specific	4, 4	4, 0	4, 2	0, 0	-36.66	-97.637	-26.4174	4.24328	-8.18772	-9.59239	-5.25981	-6.62699	-6.19606	-8.71578	-0.465866	-0.353044	-2.32767	-1.7109	-3.68986	0.180517
Q02156	PKCe	S729	0, 0	0, 0	0, 0	0, 0	80.5695	21.493	24.575	-7.99254	-0.655136	0.031848	-0.574201	-0.411602	-0.618208	-0.548262	-0.611172	-0.802966	1.1384	0.203478	0.102428	-0.306874
P05129	PKCg	Pan-specific	4, 4	4, 2	4, 2	0, 0	-36.66	-39.7435	-26.4174	155.27	-8.18772	-9.59239	-6.10464	-6.62699	-6.19606	-8.71578	-1.42717	-0.447202	-2.32767	-0.653668	-3.68986	1.56796
P05129	PKCg	T514	0, 0	3, 3	3, 0	0, 0	87.1101	105.398	247.832	33.2148	-0.51163	0.296351	-0.80184	-0.111995	-1.47068	-0.380098	-0.560422	-0.210122	1.3389	0.863279	1.59704	0.560488
P05129	PKCg	T514	0, 0	0, 0	3, 3	0, 0	80.8791	222.342	73.2301	11.5495	-0.183018	0.490092	-0.713954	0.366543	-0.387847	0.137126	-0.147596	-0.0601749	1.11541	1.35214	0.768767	0.139876
P05129	PKCg	T655	0, 0	3, 3	0, 3	0, 0	25.3875	128.367	137.047	38.2147	-0.192327	0.0486089	-0.554841	0.200632	-1.22671	-0.476225	-0.315202	0.00868775	0.399254	0.945406	1.09901	0.51823
P05129	PKCg	T674	0, 0	0, 0	0, 0	0, 0	93.4846	14.3566	65.0446	72.0691	-0.370084	0.433868	-0.0302905	0.0180309	-0.51469	-0.104962	-0.407721	0.116367	1.33223	0.0604699	0.600003	0.838551
P24723	PKCh	S674	0, 0	0, 0	0, 0	0, 0	81.9568	6.61181	49.2795	51.3029	-0.766751	-0.239756	-0.359813	-0.483478	-0.534346	-0.400935	-0.402099	0.0654913	0.873282	-0.154756	0.195366	0.748154
P41743	PKCl/i	Pan-specific	4, 4	4, 4	4, 4	0, 0	-36.66	-39.7435	-26.4174	28.4836	-8.18772	-9.59239	-6.10464	-6.62699	-6.19606	-8.71578	-0.544198	-0.252714	-2.32767	-0.653668	-3.68986	0.46638
P41743	PKCl/i	T564	0, 0	0, 0	0, 0	0, 0	173.996	84.1091	98.9716	163.5	-1.40919	-0.310326	-1.04522	-0.606765	-1.01814	-0.470097	-1.03603	0.0025567	1.82092	0.548683	0.802559	1.66177
Q15139	PKCm (PKD)	Pan-specific	4, 4	4, 4	4, 2	0, 0	-36.66	-39.7435	-26.4174	92.6481	-8.18772	-9.59239	-6.10464	-6.62699	-6.19606	-8.71578	-0.972343	-0.310452	-2.32767	-0.653668	-3.68986	1.05904
Q15139	PKCm (PKD)	S738+S742	0, 0	0, 0	0, 0	0, 1	132.984	76.612	24.9607	-4.44888	-1.25575	-0.239176	-0.71882	-0.258358	-0.415017	-0.375902	-0.371687	-0.508919	1.68456	0.576227	0.0572802	-0.219575
Q15139	PKCm (PKD)	S910	0, 0	0, 0	0, 0	0, 0	39.8496	7.9089	23.7435	5.99331	-0.0859672	0.13961	-0.0170045	-0.129461	-0.0844131	-0.0700746	-0.209477	-0.199687	0.373804	-0.14073	0.0209972	0.0156639
Q15139	PKCm (PKD)	S910	0, 0	2, 0	2, 2	2, 2	101.462	167.889	177.238	106.849	-2.4095	-1.25835	-2.38146	-1.27097	-2.38796	-1.74046	-4.66461	-2.16735	1.90755	1.38967	0.948198	3.99568
O94806	PKN3	Pan-specific	0, 0	0, 0	0, 0	0, 0	45.6834	-3.69415	21.8631	6.7927	-0.427005	-0.0172272	-0.0839676	-0.149786	-0.198116	-0.0725261	0.3945	0.449961	0.679042	-0.0823653	0.183913	0.0887379
Q04759	PKCq	Pan-specific	0, 0	0, 0	0, 0	0, 0	56.9858	9.49926	3.75526	-9.88931	0.609871	1.17681	0.714439	0.770947	0.748542	0.935567	1.32667	1.28991	0.939466	0.0707152	0.273878	-0.0588107
Q04759	PKCq	T538	0, 0	2, 2	2, 2	2, 2	63.5185	30.8304	63.6488	-43.2253	-1.55781	-1.06519	-1.60572	-1.40114	-1.75933	-1.67959	-1.88421	-2.71898	0.81632	0.256009	0.116773	-1.33564
Q05513	PKCz	Pan-specific	4, 4	4, 4	2, 4	1, 0	-36.66	-39.7435	-26.4174	37.5083	-8.18772	-9.59239	-6.10464	-6.62699	-6.19606	-8.71578	-0.725689	-0.421298	-2.32767	-0.653668	-3.68986	0.487032
Q05513	PKCz/l	T410/T412	0, 0	0, 0	0, 0	0, 0	112.395	71.8356	185.485	-3.52779	-1.19829	-0.200824	-1.28778	-0.655352	-1.57776	-0.755934	-1.46588	-1.2131	1.6529	0.791421	1.20347	0.404457
Q13976	PKG1	Pan-specific	0, 0	0, 0	0, 0	0, 0	62.3766	63.4354	21.4126	6.92782	-0.630283	-0.0768322	-0.520986	-0.0442122	-0.468005	-0.359684	0.451702	0.508957	0.917121	0.596639	0.158624	0.0916088
Q13976	PKG1a	Pan-specific	0, 0	0, 0	0, 0	0, 0	119.161	34.9453	41.4847	-27.9084	-1.59126	-0.750601	-1.21026	-0.889329	-1.18021	-1.15176	-1.02788	-1.56772	1.39306	0.401619	0.0416557	-0.863752
P14619	PKG1b	Pan-specific	0, 0	0, 0	0, 0	0, 0	69.7179	0.54794	36.0785	-15.159	-1.60748	-0.99134	-0.951966	-0.962193	-1.27183	-1.30899	-1.07097	-1.31639	1.021	-0.0127982	-0.0544123	-0.39267
P14618	PKM2	Pan-specific	0, 0	0, 0	0, 0	0, 0	114.492	19.593	29.4373	-9.16601	-0.955821	-0.323802	-0.495871	-0.46887	-0.510808	-0.470804	-0.681995	-0.876619	1.04732	0.0337889	0.0585821	-0.311403
P19525	PKR1	Pan-specific	4, 4	2, 2	2, 2	0, 0	-36.66	-99.3743	72.2484	64.0518	-8.18772	-9.59239	-2.49844	-6.62699	-5.05821	-6.08544	-0.348444	0.267004	-2.32767	-5.1665	-1.50427	0.984729
P19525	PKR1	Pan-specific	0, 0	0, 0	0, 0	0, 0	76.8564	20.9085	35.7709	-0.543409	0.369893	1.1086	0.495183	0.639333	0.465228	0.945751	1.18959	1.23961	1.22411	0.18039	0.703674	0.0800287
P19525	PKR1	T451	0, 0	0, 0	0, 0	0, 0	82.6314	-2.50963	5.04493	9.01874	0.126664	0.909018	0.623497	0.54992	0.522739	0.693244	1.07255	1.25435	1.29644	-0.092074	0.249687	0.290885
P19525	PKR1	T446	0, 0	0, 0	0, 0	0, 0	386.382	126.339	81.7548	71.1286	-2.45947	-0.358097	-1.46881	-0.652353	-0.873639	-0.285997	-0.931743	-0.420445	3.48218	1.02172	0.86054	0.818088
P16885	PLC R(PLCg2)	Pan-specific	4, 4	4, 4	4, 4	0, 0	-36.66	-39.7435	-26.4174	322.364	-8.18772	-9.59239	-6.10464	-6.62699	-6.19606	-8.71578	-2.40371	-0.953278	-2.32767	-0.653668	-3.68986	2.32072
P53350	Plk1	Pan-specific	0, 0	0, 0	0, 0	0, 0	79.2153	89.2102	103.404	-26.9109	-1.60035	-0.914346	-1.50188	-0.677511	-1.47214	-0.968368	-0.923669	-1.31371	1.13677	1.03162	0.737717	-0.624075
P53350	Plk1	T210	0, 0	0, 2	0, 0	0, 2	72.1767	35.6159	79.1486	-7.74471	-1.77303	-1.18687	-1.33772	-0.995784	-1.46021	-1.26368	-1.28442	-1.81386	0.971326	0.427905	0.287792	-0.847104
Q9NYY3	Plk2	Pan-specific	0, 0	0, 0	0, 0	0, 0	87.8291	69.0331	57.49	-13.7011	-1.30773	-0.535173	-1.0244	-0.452921	-0.716136	-0.438368	-0.676109	-0.948284	1.2802	0.715154	0.406761	-0.435486
Q9NYY3	Plk2	Pan-specific	4, 4	4, 4	4, 4	0, 0	-36.66	-39.7435	-26.4174	80.7377	-8.18772	-9.59239	-6.10464	-6.62699	-6.19606	-8.71578	-0.83447	-0.206873	-2.32767	-0.653668	-3.68986	1.00417
Q9H4B4	Plk3	Pan-specific	0, 0	0, 0	0, 0	0, 0	37.0758	7.51187	-0.00641636	-16.0174	-0.83454	-0.640327	-0.491501	-0.533548	-0.359358	-0.663814	-0.522539	-0.782299	0.32183	-0.0526176	-0.445843	-0.41562
P62136	PP1/Ca	Pan-specific	0, 0	0, 0	0, 0	0, 0	78.8592	109.128	92.3539	45.531	-0.447048	0.289154	-0.387131	0.416084	-0.153568	0.702484	0.242214	0.723381	1.21996	1.00515	1.2536	0.769878
P62136	PP1/Ca	Pan-specific	0, 0	0, 0	0, 0	0, 0	180.099	79.932	101.636	27.5292	-0.943706	0.406577	-0.352779	0.245726	-0.316804	0.486468	-0.209061	0.0486005	2.23755	0.748976	1.17631	0.412265
P62136	PP1/Ca	T320	0, 0	0, 0	0, 0	0, 0	124.34	87.9107	84.1983	19.8453	-0.803674	0.278721	-1.29715	-0.550096	-0.998559	-0.474198	-0.93763	-0.956892	1.79363	0.934875	0.767871	-0.0308194
P62140	PP1/Cb	Pan-specific	0, 0	0, 0	0, 0	0, 0	164.401	51.2749	64.3852	-10.4896	-0.740874	0.472945	-0.547025	-0.117464	-0.487377	-0.058147	-0.500768	-0.643234	2.01142	0.537557	0.628561	-0.227948
P62140	PP1/Cb	Pan-specific	0, 0	0, 0	0, 0	0, 0	74.7207	83.2335	72.1425	-5.29222	-1.10458	-0.541935	-1.1098	-0.621761	-1.02135	-0.601866	-0.954722	-1.01215	0.932361	0.610736	0.61429	-0.091889
P36873	PP1/Cg	Pan-specific	0, 0	0, 0	0, 0	0, 0	-44.308	1.20768	3.52573	2.33798	0.941645	0.0419431	0.219302	0.186694	0.508993	0.562559	-0.393043	-0.417075	-1.49089	-0.0408061	0.0784415	-0.0384518
Q15172	PP2A B' (B56)	Pan-specific	0, 0	0, 0	0, 0	0, 0	-36.9856	-39.2302	-13.5678	10.2735	1.68924	1.13131	1.28421	0.750764	1.14154	1.22664	1.24962	1.44977	-0.924548	-0.667561	0.124624	0.320239
P30153	PP2A/Aa/b	Pan-specific	0, 0	0, 0	0, 0	0, 0	-42.3777	-50.1561	-41.2451	-8.55253	1.225	0.48874	0.751952	0.0117149	1.00134	0.536535	-0.208005	-0.355562	-1.22006	-0.92634	-0.680655	-0.236094
P30153	PP2A/Aa/b	Pan-specific	0, 0	0, 0	0, 0	0, 0	-17.8414	-29.7418	-26.0941	-11.6583	0.940398	0.652436	0.607475	0.209947	0.820938	0.607865	-0.207892	-0.229327	-0.47718	-0.49747	-0.312022	-0.0342966
Q00005	PP2A/Bb	Pan-specific	0, 0	0, 0	0, 0	0, 0	-33.3268	-45.2087	-29.2281	-39.8294	0.603057	0.0601531	0.531276	-0.0447062	0.632631	0.352766	0.337525	-0.257465	-0.899644	-0.720789	-0.409834	-0.951996
Q9Y2T4	PP2A/Bg2	Pan-specific	0, 0	0, 0	0, 0	0, 0	-26.5355	-36.3146	-18.8042	19.6352	1.12818	0.661613	0.0815041	-0.314638	0.501551	0.153108	-0.357877	-0.19652	-0.773139	-0.495736	-0.510257	0.258175
P67775	PP2A/Ca	Pan-specific	0, 0	0, 0	0, 0	0, 0	-40.1801	-37.9573	-32.3834	-10.8446	1.83862	1.19627	1.46705	0.959123	1.54482	1.37712	1.07722	1.00338	-1.06444	-0.63563	-0.245572	-0.118153
Q08209	PP2B/Aa	Pan-specific	0, 0	0, 0	0, 0	0, 0	-32.1734	-41.6642	-34.9631	-37.496	0.972377	0.438264	0.965879	0.374306	1.04304	0.693291	0.715487	0.215763	-0.885078	-0.7403	-0.512167	-0.799569
P35813	PP2Ca	Pan-specific	0, 0	0, 0	0, 0	0, 0	-26.1209	-17.7936	-22.1157	0.389953	1.62265	1.26863	1.38887	1.14211	1.41075	1.41691	1.52284	1.62822	-0.58665	-0.308789	0.00903033	0.168608
O15297	PP2Cd	Pan-specific	0, 0	0, 1	0, 0	0, 0	-21.3668	-36.1316	-15.5757	5.64234	1.49375	1.23221	1.34663	0.866429	1.16785	1.21476	1.08281	1.21387	-0.433407	-0.600925	0.0686901	0.209693
Q8TF05	PP4/A’2	Pan-specific	0, 0	0, 0	0, 0	0, 0	-28.2389	-27.2562	-41.9856	-6.58141	0.536337	-0.0256801	0.433691	-0.0133024	0.675114	0.025299	-0.264641	-0.345248	-0.931316	-0.559372	-0.951586	-0.128974
P60510	PP4C	Pan-specific	0, 0	0, 0	1, 0	0, 0	-31.0318	-9.05239	-5.04256	3.61613	0.388421	-0.164114	-0.0506459	-0.354122	-0.112794	-0.231969	-0.511937	-0.523617	-0.915606	-0.379773	-0.174519	-0.0186891
P60510	PP4C	Pan-specific	0, 0	0, 0	0, 0	0, 0	-25.8003	-35.6578	-46.6312	-33.0937	0.547605	0.136616	0.735362	0.198338	1.03795	0.462	0.128112	-0.319303	-0.681049	-0.672037	-0.843412	-0.715874
P53041	PP5C	Pan-specific	0, 0	0, 0	0, 0	0, 0	-25.0973	-39.4819	-24.7342	-2.16002	1.66786	1.33543	1.48567	0.936152	1.36723	1.31503	1.13654	1.17939	-0.550866	-0.68767	-0.0764376	0.0685678
P53041	PP5C	Pan-specific	0, 0	0, 0	0, 0	0, 0	-5.08098	-11.9804	-16.9711	6.04814	-0.204887	-0.279847	-0.421412	-0.437678	-0.23775	-0.562123	-0.600041	-0.579731	-0.124215	-0.0203553	-0.47501	0.0324972
O00743	PP6C	Pan-specific	0, 0	0, 0	0, 0	0, 0	-45.2686	-38.9856	-30.6439	15.9143	1.4167	0.5681	0.676143	-0.0555741	0.630993	0.252159	-0.200308	-0.0462481	-1.40621	-0.915678	-0.554763	0.246499
O00743	PP6C	Pan-specific	0, 0	0, 0	0, 1	0, 0	-28.4202	-25.9209	-17.9631	3.74575	0.393053	-0.111996	0.0360331	-0.398158	-0.136404	-0.281848	-0.69056	-0.728743	-0.836917	-0.543351	-0.212988	-0.061094
Q96B36	PRAS40	T246	0, 0	0, 0	0, 0	0, 0	-33.3469	-37.7519	-28.9464	-10.214	1.58444	1.08175	1.48308	0.893387	1.50803	1.44199	0.993421	0.922295	-0.833006	-0.737942	-0.0967074	-0.113803
Q16512	PRK1 (PKN1)	Pan-specific	4, 4	2, 2	2, 2	0, 0	-36.66	-39.7435	-26.4174	251.366	-8.18772	-9.59239	-6.10464	-6.62699	-6.19606	-8.71578	-1.91523	-0.375457	-2.32767	-0.653668	-3.68986	2.46367
Q16512	PRK1/2 (PKN1/2)	T774, T816	0, 0	0, 0	0, 0	0, 0	-15.7693	-22.2197	-3.63525	-15.0976	0.58337	0.365617	0.105163	-0.127521	-0.027615	-0.140273	-0.274376	-0.563327	-0.360838	-0.291183	-0.164976	-0.462328
Q16513	PRK2 (PKN2)	Pan-specific	0, 0	0, 0	0, 0	0, 0	-5.05026	-31.6311	-27.6669	18.8552	0.504446	0.277175	0.635184	0.182284	0.709407	0.382749	0.205387	0.423569	-0.37661	-0.566764	-0.478355	0.349095
Q16513	PRK2 (PKN2)	Pan-specific	4, 4	2, 2	4, 1	0, 0	-36.66	8545.89	-26.4174	177.49	-8.18772	-9.59239	-6.10464	-4.14185	-6.19606	-8.71578	-1.78543	-0.541483	-2.32767	2.45626	-3.68986	1.99034
Q9Y478	PRKAB1	Pan-specific	0, 0	0, 0	0, 0	0, 0	-28.9901	-12.393	-28.9689	-3.62607	0.0881817	-0.465279	-0.624894	-0.444523	0.0431066	-0.533836	-0.449943	-0.623825	-0.917139	0.225718	-0.844872	-0.278216
Q96J92	PRKWNK4	Pan-specific	0, 0	0, 0	0, 0	0, 0	-45.1219	-49.6784	-47.8734	-21.5214	0.453538	-0.500733	0.428895	-0.398935	0.502049	-0.329889	-0.131484	-0.444523	-1.58132	-1.03595	-1.21828	-0.500868
P06401	Progesterone Receptor	S294	0, 0	0, 0	0, 0	0, 0	-33.6799	-0.896075	6.04849	3.96791	0.113435	-0.462526	-0.104962	-0.0832377	0.0847704	0.145188	-0.437755	-0.4511	-0.954425	0.0271865	0.0884748	-0.0213521
Q13523	PRP4K	Pan-specific	0, 0	0, 0	0, 0	0, 0	-27.7923	-42.7522	-44.4462	-13.8206	0.277518	-0.486001	0.0683602	-0.573208	0.308437	-0.56943	-0.546877	-0.768616	-1.26523	-0.802865	-1.28554	-0.354787
P78352	PSD-95	Pan-specific	0, 0	0, 0	0, 0	0, 0	-33.4743	-25.7548	-13.8146	2.91624	0.282685	-0.416059	0.013866	-0.289409	0.0834172	-0.176197	-0.564158	-0.523252	-1.15789	-0.379522	-0.380178	0.0654505
NA	PSTAIRE	Pan-specific	0, 0	0, 0	0, 0	0, 0	-32.3557	-25.4899	-31.3239	-17.3508	-0.370618	-0.975931	-3.98435	-1.13343	-0.397568	-1.17646	-0.890502	-1.27802	-1.00306	3.56766	-1.14061	-0.620037
P60484	PTEN	Pan-specific	4, 4	0, 0	2, 2	0, 0	-36.66	41452.1	-26.4174	51.3058	-8.18772	-9.59239	-6.10464	-0.700235	-6.19606	-8.71578	-0.768326	-0.33928	-2.32767	6.76313	-3.68986	0.686483
P60484	PTEN	Pan-specific	0, 0	2, 2	2, 2	2, 2	-29.7323	-30.249	-22.1848	-29.0116	-1.20889	-1.67704	-1.3946	-1.51317	-1.52018	-2.335	-2.49793	-2.95322	-0.775764	-0.148385	-1.19322	-0.728477
P60484	PTEN	S380+T382+S385	0, 0	0, 0	0, 0	0, 0	-47.0079	-51.4555	-41.6056	-19.7821	1.89452	1.05929	1.6694	0.857466	1.63947	1.31494	0.989007	0.789442	-1.38406	-1.01606	-0.475241	-0.319307
P18031	PTP1B	Pan-specific	0, 0	0, 0	0, 0	0, 0	-35.3535	-45.7297	-29.8704	1.57023	1.70723	1.18903	1.50705	0.842153	1.49436	1.38533	1.02995	1.12539	-0.858716	-0.832064	-0.159667	0.152715
P29350	PTP1C	Pan-specific	0, 0	0, 0	0, 0	0, 0	-28.6304	-50.965	-28.7155	-1.80375	1.79943	1.40875	1.65817	0.928884	1.42727	1.29976	1.12552	1.16624	-0.647385	-0.912641	-0.186726	0.0651476
Q06124	PTP1D	Pan-specific	0, 0	0, 0	0, 0	0, 0	-28.2981	-41.2993	-22.3813	-16.3165	1.65401	1.26351	1.52286	0.908665	1.32283	1.27473	1.15759	1.02267	-0.647094	-0.768612	-0.0704378	-0.215887
Q06124	PTP1D	Pan-specific	0, 0	0, 0	0, 0	0, 0	-10.6783	-16.8069	-5.45482	-1.08994	0.483201	0.377258	0.494366	0.32166	0.472849	0.530831	0.391708	0.396893	-0.175558	-0.216126	0.0849081	0.00829535
Q16825	PTPD1	Pan-specific	0, 0	0, 0	0, 0	0, 0	-19.0048	-50.4438	-32.2397	-18.5641	1.83377	1.56912	1.74073	0.937846	1.57772	1.46816	1.228	1.07277	-0.438552	-1.00474	-0.160443	-0.248374
Q15119	PyDK2 (PDHK2)	Pan-specific	0, 0	0, 0	0, 0	0, 0	-49.6255	-45.3766	-52.8311	-20.0531	0.452424	-0.50281	0.124559	-0.523633	0.383646	-0.596491	-0.495259	-0.758384	-1.58292	-0.811154	-1.43531	-0.421005
Q14289	Pyk2	Pan-specific	2, 2	0, 0	2, 2	0, 0	-36.66	273.912	-15.3825	81.4727	-8.18772	-9.59239	-1.33762	-0.680158	-2.24968	-2.72837	-0.33369	0.355437	-2.32767	0.82275	-0.700987	1.10262
Q14289	Pyk2	Pan-specific	0, 0	0, 0	0, 0	0, 0	-29.3937	-45.0329	-26.2516	-2.38632	1.60813	1.20154	1.50428	0.805668	1.32724	1.22716	1.06085	1.10517	-0.673767	-0.874254	-0.146564	0.0709171
Q14289	Pyk2	Y579	0, 0	0, 0	0, 0	0, 0	-25.8934	-36.4187	-23.0948	-11.4213	1.4232	1.06759	1.35338	0.878461	1.19837	1.18718	1.23362	1.16368	-0.58928	-0.594314	-0.0163875	-0.111911
P20339	Rab5	Pan-specific	0, 0	0, 0	0, 0	0, 0	-41.9274	-38.8188	-19.7231	-16.2683	0.581811	-0.28714	0.0156423	-0.533301	-0.113827	-0.585695	-0.554423	-0.803534	-1.43994	-0.686952	-0.691001	-0.398583
P20339	Rab5	Pan-specific	0, 0	0, 0	0, 0	0, 0	-17.3183	-20.0481	-16.0466	54.5778	1.67356	1.46391	1.07391	0.822287	1.17818	1.23234	0.751257	1.30989	-0.347402	-0.314881	0.0793187	0.893827
P60953	Rac1	Pan-specific	0, 0	0, 0	0, 0	0, 0	-35.2604	-45.2254	-26.9281	-13.0222	1.79493	1.25433	1.53657	0.84681	1.37667	1.29014	1.18061	1.08621	-0.895824	-0.863178	-0.126709	-0.151043
P60953	Rac1	S71	0, 0	0, 0	0, 0	0, 0	-24.4185	-30.4167	-19.5688	-6.29552	1.51166	1.17183	1.17803	0.75034	1.25196	1.27543	0.809176	0.801786	-0.563129	-0.535214	0.0343707	-0.0118242
O75943	Rad17	S656	0, 0	0, 0	0, 0	0, 0	4.83242	16.5013	6.30786	8.01983	1.03598	1.14657	0.406373	0.577231	0.579964	0.835432	0.446986	0.558168	0.183258	0.213814	0.374106	0.177894
P04049	Raf1	Pan-specific	0, 0	0, 0	0, 0	2, 2	-35.9932	-68.0734	-27.0081	-13.0782	-0.221456	-1.04027	-0.396758	-1.79104	-0.468966	-1.18273	-1.42898	-1.79449	-1.35685	-1.74482	-1.04524	-0.58483
P04049	Raf1	Pan-specific	0, 0	0, 0	0, 0	0, 0	-48.347	-41.5425	-46.1257	-12.2629	0.647017	-0.34433	-0.0442515	-0.733015	0.208551	-0.635244	-0.333426	-0.541929	-1.64276	-0.861925	-1.23565	-0.333609
P04049	Raf1	Pan-specific	4, 4	4, 4	4, 4	0, 0	-36.66	-39.7435	-26.4174	652.074	-8.18772	-9.59239	-6.10464	-6.62699	-6.19606	-8.71578	-2.87008	-0.695043	-2.32767	-0.653668	-3.68986	3.4801
P04049	Raf1	S259	0, 0	0, 0	0, 0	0, 0	-15.8598	-23.2273	-24.7598	-12.5906	0.669064	0.371123	0.193761	-0.150844	0.16443	-0.255306	-0.448886	-0.633042	-0.493716	-0.431242	-0.614659	-0.294653
P10398	RafA (Araf)	Pan-specific	0, 0	0, 0	0, 0	0, 0	-29.098	-24.3874	-15.9163	-4.04703	0.118602	-0.39355	-0.31253	-0.563011	-0.194377	-0.544538	-0.605361	-0.706574	-0.848687	-0.313454	-0.512774	-0.161943
P10398	RafA (Araf)	Pan-specific	4, 4	4, 4	2, 2	2, 1	-36.66	-39.7435	-26.4174	554.016	-8.18772	-9.59239	-6.10464	-6.62699	-6.19606	-8.71578	-1.80018	-0.546599	-2.32767	-0.653668	-3.68986	2.00576
P15056	RafB (Braf)	Pan-specific	4, 4	4, 4	4, 2	0, 0	-36.66	-39.7435	-26.4174	154.47	-8.18772	-9.59239	-6.10464	-6.62699	-6.19606	-8.71578	-1.10052	-0.0867698	-2.32767	-0.653668	-3.68986	1.62202
P15056	RafB (Braf)	Pan-specific	0, 0	0, 0	0, 0	0, 0	48.6078	11.5488	25.1347	-12.3318	-1.15513	-0.765865	-0.830437	-0.774757	-1.20802	-1.15082	-0.958646	-1.2107	0.645058	0.0696783	0.0837634	-0.403292
P06400	Rb	Pan-specific	0, 0	0, 0	0, 0	0, 0	51.3612	21.6365	28.9228	-1.32215	0.780858	1.34524	0.71252	0.889823	0.747296	1.23352	1.17752	1.23961	0.93523	0.221878	0.712026	0.0993477
P06400	Rb	T356	0, 0	0, 0	0, 0	0, 0	74.0247	55.35	34.6019	-14.6063	0.937636	1.72567	0.792023	1.22352	0.944647	1.61822	1.38067	1.28752	1.30584	0.539973	0.986378	-0.149036
P06400	Rb	S612	0, 0	0, 0	0, 0	0, 0	25.4525	-16.9495	-26.0914	-6.28622	1.20772	1.52077	1.34329	1.11265	1.4361	1.42639	1.49439	1.51912	0.518744	-0.288623	-0.0142218	0.0395663
P06400	Rb	S780	0, 0	3, 0	0, 0	1, 0	20.4241	-0.384254	22.4076	180.374	-1.03942	-1.02718	-0.432211	-0.668867	-0.82001	-0.873419	-0.958911	-0.0656563	0.0202843	-0.296153	-0.078211	1.42923
P06400	Rb	S807	0, 0	0, 0	0, 0	0, 0	14.4683	11.9963	19.5414	-15.5594	0.429086	0.582253	0.516533	0.556977	0.458356	0.759812	0.524638	0.352839	0.253813	0.0506121	0.441451	-0.274883
P06400	Rb	S807+S811	0, 0	0, 0	0, 0	0, 0	176.84	75.2556	175.617	27.4132	-1.05007	0.274229	-0.606955	-0.0564209	-1.05621	-0.134851	-0.619473	-0.360515	2.19449	0.688943	1.34924	0.414338
P06400	Rb	T821	0, 0	0, 0	0, 0	0, 0	63.056	30.7927	30.913	-13.3476	0.767496	1.47073	0.860478	1.10238	0.98453	1.58404	1.29879	1.21971	1.16532	0.302719	0.877921	-0.126521
P06400	Rb	T826	0, 0	0, 0	0, 0	0, 0	24.4285	30.2173	19.2135	1.55108	1.32486	1.6464	0.980515	1.18707	1.14335	1.63194	1.1416	1.24931	0.532823	0.25848	0.715487	0.172349
P06400	Rb	S608	0, 0	0, 3	3, 0	1, 3	63.7423	452.824	26.9105	11.1249	-0.3463	0.279687	-2.11361	-0.225155	-0.186756	0.0970531	-0.379837	-0.231438	1.03732	2.36323	0.415609	0.237441
P06400	Rb	S795	0, 0	2, 0	2, 0	2, 2	22.197	17.1131	76.0428	14.0103	-1.58026	-1.49243	-1.09083	-0.922532	-1.51726	-1.34845	-1.39894	-1.53987	0.14555	0.210609	0.247201	-0.225487
O43353	RIP2/RICK	Pan-specific	0, 0	0, 0	0, 0	0, 0	73.0844	16.3354	34.2052	6.21404	0.521683	1.2595	0.787228	0.906125	0.677714	1.19609	1.14563	1.3036	1.22263	0.148789	0.759105	0.252748
Q13546	RIPK1	Pan-specific	0, 0	0, 0	0, 0	0, 0	67.323	20.0367	35.1008	-9.71791	0.682292	1.4231	0.816393	0.976907	0.763783	1.35478	1.30607	1.27647	1.22759	0.200869	0.865448	-0.0473512
O75116	ROKa (ROCK2)	Pan-specific	0, 0	0, 0	0, 0	0, 0	17.8671	-16.6391	17.0125	37.6042	0.986718	1.17569	1.04854	0.81209	0.910711	1.29745	1.11062	1.53763	0.313152	-0.295901	0.566338	0.683235
O75116	ROKa (ROCK2)	Pan-specific	0, 0	0, 0	0, 0	0, 0	24.1228	6.75527	17.0062	23.94	-0.150683	0.0788461	-0.313489	-0.191528	0.0933881	0.290629	-0.567441	-0.297824	0.380352	0.152624	0.288838	0.431392
Q13464	ROKb (ROCK1)	Pan-specific	0, 0	0, 0	0, 0	0, 0	62.6563	19.0324	26.9381	22.2168	0.562348	1.21047	0.856038	0.971649	0.716885	1.17006	1.1634	1.43738	1.07401	0.144677	0.663634	0.438374
Q04912	RONa	Pan-specific	0, 0	0, 0	0, 0	0, 0	66.2952	20.5545	40.4659	2.99226	0.60074	1.27017	0.88531	1.01748	0.719591	1.31956	1.25366	1.36487	1.10932	0.165405	0.878591	0.177936
Q01974	ROR2	Pan-specific	0, 0	0, 0	0, 0	0, 0	32.2557	100.304	82.2781	3.60535	-0.885181	-0.451368	-1.04298	-0.284046	-1.06323	-0.472595	-0.635094	-0.584197	0.71887	0.949736	0.864918	0.0814366
P08922	ROS	Pan-specific	0, 0	0, 0	0, 0	0, 0	14.9013	10.7553	-1.88085	11.9891	-0.485441	-0.618977	-0.494663	-0.573385	-0.323606	-0.60097	-0.786852	-0.689237	-0.221283	-0.0985135	-0.40617	0.156187
Q15418	RSK1	Pan-specific	4, 4	2, 4	2, 2	0, 1	-36.66	-39.7435	-99.2303	1537.84	-8.18772	-9.59239	-6.10464	-6.62699	-3.48831	-8.71578	-4.98605	0.0799054	-2.32767	-0.653668	-7.65508	8.10564
Q15418	RSK1	Pan-specific	0, 0	0, 0	3, 0	0, 0	58.3906	-21.5276	-12.9969	16.6169	-0.334319	0.172021	0.314969	0.0114326	0.360392	0.187146	-0.0884698	0.0462861	0.839054	-0.379848	-0.2537	0.215612
Q15418	RSK1/2	S363/S369	0, 0	0, 0	0, 0	0, 0	58.1752	60.1986	71.5416	-19.8015	0.140916	0.721363	0.0994438	0.527726	0.0371954	0.70371	0.390576	0.139226	0.961858	0.535956	0.97604	-0.402165
Q15418	RSK1/2	S221/S227	0, 0	0, 0	0, 0	0, 0	75.9267	39.4121	35.0907	-8.41966	0.577135	1.32567	0.663177	0.970379	0.737966	1.32069	1.10967	1.12032	1.2404	0.384435	0.85334	0.0170278
Q15418	RSK1/2	S363/S369	0, 0	0, 0	0, 0	0, 0	-5.86283	-5.36862	16.4007	72.9589	0.456433	0.268095	0.391772	0.217922	0.417582	0.605178	0.35575	0.913403	-0.312095	-0.217558	0.274714	0.892257
Q15418	RSK1/2	S380/S386	3, 2	2, 2	2, 3	2, 1	-32.1876	48.2001	-57.82	2143.07	-1.43636	-2.09157	-3.30036	-1.87336	-1.08769	-2.24387	-2.94633	-0.927454	-1.08575	1.78576	-1.69309	3.23025
Q15418	RSK1/2	S380/S386	0, 0	0, 0	0, 0	0, 0	44.5593	15.2582	-18.5625	24.3262	0.63076	1.11899	0.702787	0.771441	1.38546	1.21188	1.06673	1.37421	0.809041	0.0859147	-0.254193	0.491961
Q15418	RSK1/2/3	T573/T577/T570	0, 0	0, 0	0, 0	0, 0	72.8989	26.72	36.2326	-30.6452	-0.717402	-0.0452425	-0.843297	-0.477621	-0.635337	-0.502249	-0.573704	-1.06311	1.11383	0.457611	0.194892	-0.783058
Q15418	RSK1/3	T359+S363/T356+S360	0, 0	2, 0	2, 0	2, 2	-26.2981	10.7083	28.9647	-55.6429	-0.746397	-1.30931	-1.40479	-1.11452	-1.60614	-1.85874	-1.63337	-2.29407	-0.932809	0.363251	-0.36991	-1.05713
P51812	RSK2	Pan-specific	0, 0	0, 0	0, 0	1, 0	17.6446	28.723	-4.29781	98.6625	-0.781939	-0.850104	-0.703651	-0.661668	-0.443505	-0.886054	-1.00053	-0.471199	-0.112956	0.0525381	-0.648065	0.846939
Q9UK32	RSK4	Pan-specific	0, 0	0, 0	0, 0	0, 0	56.8301	51.6426	-10.5728	6.67693	-0.385494	0.160429	-0.565889	-0.118946	-0.188573	-0.460951	-0.409155	-0.419471	0.904648	0.559308	-0.398869	-0.0165059
P34925	RYK	Pan-specific	0, 0	0, 0	0, 0	0, 0	33.7239	76.4534	-13.3049	98.1859	-1.06859	-0.806294	-0.900988	-0.497768	-0.386814	-0.607712	-1.25809	-0.71571	0.434658	0.504593	-0.323482	0.867816
P62753	S6	S235	0, 0	0, 0	0, 0	0, 0	76.3874	23.5344	47.6596	32.6915	-0.718025	0.0309302	-0.0377506	0.135954	-0.227708	0.0997875	-0.31739	-0.0389395	1.24109	0.217376	0.479582	0.445527
P23443	S6Ka (p70 S6Ka, p85 S6Ka)	Pan-specific	2, 0	0, 0	2, 2	0, 0	1249.76	94.8852	34.5709	53.9052	-5.87916	-4.98005	-1.40746	-0.569856	-4.14927	-5.57232	-0.276413	0.292949	1.48991	1.04818	-2.08391	0.910992
P23443	S6Ka (p70 S6Ka, p85 S6Ka)	Pan-specific	0, 0	0, 2	0, 2	1, 2	-31.5638	-28.0276	13.241	-43.1454	-0.560712	-1.38191	-0.658607	-1.22764	-0.97698	-1.37306	-1.85656	-2.24234	-1.36081	-0.712098	-0.580014	-0.617264
P23443	S6Ka (p70 S6Ka, p85 S6Ka)	Pan-specific	0, 0	0, 0	0, 0	0, 0	26.7066	-7.11148	6.98082	-8.63674	-1.10917	-0.849428	-0.844398	-0.894974	-0.865947	-1.00665	-1.05841	-1.26742	0.430418	-0.0632912	-0.206043	-0.334425
P23443	S6Ka (p70 S6Ka, p85 S6Ka)	T229, T252	0, 0	0, 0	0, 0	1, 0	9.14549	32.1096	25.2192	9.39399	-0.304165	-0.305737	-0.213134	-0.0349675	-0.0788579	0.119824	0.151732	0.214788	-0.00260399	0.222959	0.290949	0.100891
P23443	S6Ka (p70 S6Ka, p85 S6Ka)	T444+S447, T421+S424	0, 0	0, 0	0, 0	0, 0	90.5678	63.4505	17.8374	1.101	-0.361532	0.536607	-0.104181	0.3519	-0.0335263	0.0868699	-0.126126	-0.145441	1.4883	0.570743	0.176307	-0.0309039
P23443	S6Ka (p70 S6Ka, p85 S6Ka)	T412, T389	2, 0	2, 2	2, 2	2, 2	24.4879	-11.461	35.2146	-49.2144	-1.99604	-1.7735	-2.10554	-1.8626	-1.959	-2.16636	-3.81277	-5.54511	0.368767	0.304019	-0.303659	-2.77177
Q9UBS0	S6Kb (p70 S6Kb)	Pan-specific	0, 0	0, 0	0, 0	3, 0	-5.79222	28.0077	-3.34485	16.1053	-0.524591	-0.863918	-0.706245	-0.555072	-0.47705	-0.838108	-0.838093	-0.600803	-0.562299	0.189179	-0.528731	0.379667
Q13033	SG2NA	Pan-specific	0, 0	0, 0	0, 0	0, 0	38.3352	30.7792	18.8219	22.1779	0.238324	0.640264	0.526267	0.735944	0.483603	0.777963	1.05964	1.36588	0.666054	0.262392	0.431058	0.489993
Q96BR1	SGK3	Pan-specific	0, 0	0, 0	0, 0	1, 0	13.3005	67.8658	49.1762	55.4324	-0.0985273	0.00658586	-0.33079	0.147598	-0.170732	0.255365	0.0901537	0.62362	0.174183	0.598659	0.623973	0.853557
P29353	Shc1	Y349+Y350	0, 0	0, 0	0, 0	0, 0	47.3609	36.7132	11.4774	-9.8698	0.876662	1.46797	1.05472	1.34126	1.13983	1.5541	1.37097	1.33279	0.979859	0.358576	0.606668	-0.0610838
P29353	Shc1	Y349+Y350	0, 0	0, 0	0, 0	0, 0	52.5536	10.0545	14.3986	-17.0334	0.976608	1.55902	1.33785	1.37799	1.10963	1.57301	1.51601	1.41189	0.965117	0.0502334	0.678573	-0.166601
Q06124	SHP2	S580	0, 0	0, 0	0, 0	0, 0	5.4006	2.14575	31.86	5.92581	-0.0305157	-0.195125	0.227437	0.0978108	0.043712	0.245087	-0.000440966	0.0360136	-0.272773	-0.162216	0.294893	0.058328
Q9H2G2	SLK	Pan-specific	0, 0	0, 1	0, 0	0, 0	38.0342	103.345	82.0784	23.1671	-0.439966	-0.140929	-0.491288	0.185459	-0.378552	0.228775	-0.509484	-0.287876	0.495533	0.846888	0.889367	0.354577
Q9NR28	Smac/DIABLO	Pan-specific	0, 0	0, 0	0, 0	0, 1	-6.21267	10.5637	-0.111189	129.746	-0.501208	-0.713408	-0.635019	-0.515058	-0.456182	-0.648445	-0.613247	0.135531	-0.351637	0.15012	-0.281548	1.19806
Q15797	Smad1/5/9	S463+S465/S463+S465/S465+S467	0, 0	0, 0	0, 0	0, 0	33.484	36.5372	57.6968	7.85137	0.235651	0.642534	0.0853407	0.375188	0.104712	0.689048	0.346279	0.398192	0.674244	0.362718	0.855698	0.0830622
Q15796	Smad2	S465+S467	0, 0	0, 0	0, 0	0, 0	58.8037	55.7227	32.5341	-20.432	-0.601777	-0.187638	-0.556617	-0.10148	-0.358112	-0.112929	0.0443092	-0.168463	0.68627	0.569562	0.359045	-0.34044
Q15796	Smad2/3	Pan-specific	0, 0	0, 0	0, 0	0, 0	-0.941628	3.0106	-7.17912	36.4988	1.15971	1.06774	1.1268	1.02927	1.07555	1.14847	0.674359	1.15576	-0.152403	-0.122054	0.106788	0.770255
Q14683	SMC1	S957	0, 0	0, 1	0, 0	0, 0	-10.5248	32.4034	20.0611	-8.40474	-0.541649	-0.871164	-0.344644	-0.285175	-0.601115	-0.711241	-0.605399	-0.729028	-0.546038	0.0744201	-0.161268	-0.197809
O14508	SOCS2	Pan-specific	0, 0	0, 0	0, 0	0, 1	52.3092	38.5391	44.9802	57.5125	0.247677	0.738318	0.51291	0.803162	0.440693	1.00845	0.881508	1.48952	0.813039	0.363225	0.831424	0.97283
Q8WXH5	SOCS4	Pan-specific	0, 0	0, 0	0, 0	0, 0	76.8132	112.331	26.4018	-7.64959	-0.281985	0.412905	-0.0672357	0.56714	0.237431	0.528474	-0.13073	-0.345654	1.1515	0.793863	0.426201	-0.343884
Q6ND84	SOD (Cu/Zn)	Pan-specific	0, 0	0, 0	0, 0	0, 0	60.2448	88.9619	7.20277	8.28263	-0.428208	-0.031573	-0.611715	-0.105503	-0.19135	-0.279821	-0.387647	-0.248045	0.657262	0.633479	-0.129556	0.223367
P04179	SOD (Mn)	Pan-specific	0, 0	0, 0	0, 0	0, 0	78.1332	72.7085	106.974	6.52272	0.344461	1.09716	0.40076	0.924791	0.527938	1.56401	1.55574	1.76814	1.24729	0.655777	1.51721	0.339835
O95429	SODD	Pan-specific	0, 0	0, 3	0, 0	0, 0	73.8118	55.0653	39.5785	-4.07159	-0.372756	0.27988	0.084346	0.491135	0.222225	0.67283	-0.284639	-0.253242	1.08148	0.50906	0.659863	0.0502355
P48436	SOX9	S181	0, 0	0, 0	0, 0	0, 0	54.7109	38.0051	16.104	-20.8826	0.485517	1.02784	0.80094	1.09441	0.894223	1.32258	1.36489	1.20209	0.898684	0.367247	0.62728	-0.260488
Q9NYA1	SPHK1	Pan-specific	0, 0	0, 0	0, 0	0, 0	106.217	54.3738	20.559	3.84844	-0.831957	0.0593803	-0.247805	0.186059	-0.182091	-0.0475394	0.194671	0.306226	1.47703	0.542942	0.197037	0.17849
Q9NRA0	SPHK2	Pan-specific	0, 0	0, 0	0, 0	0, 0	69.1686	13.2523	15.0892	-3.58813	-0.718649	-0.116102	-0.0306813	0.0672185	-0.119881	-0.00902227	0.270815	0.355275	0.998478	0.122513	0.16234	0.135138
P12931	Src	Pan-specific	0, 0	0, 0	0, 3	0, 0	92.3801	144.954	41.1493	-8.78289	-1.72755	-1.02163	-1.55939	-0.86851	-1.15179	-1.34736	-0.977022	-1.2472	1.16979	0.864578	-0.286398	-0.432295
P12931	Src	Pan-specific	0, 0	0, 0	0, 0	0, 0	111.382	110.971	76.8462	17.7987	-0.97809	-0.114363	-0.735481	-0.0214532	-0.538904	-0.0808707	-0.519634	-0.391982	1.43128	0.893541	0.670742	0.204245
P12931	Src	Pan-specific	4, 4	4, 4	4, 4	0, 0	-36.66	-39.7435	-26.4174	437.106	-8.18772	-9.59239	-6.10464	-6.62699	-6.19606	-8.71578	-2.45974	-0.664591	-2.32767	-0.653668	-3.68986	2.87228
P12931	Src	Pan-specific	4, 4	4, 4	4, 4	0, 0	-36.66	-39.7435	-26.4174	1374.51	-8.18772	-9.59239	-6.10464	-6.62699	-6.19606	-8.71578	-2.72224	-0.52041	-2.32767	-0.653668	-3.68986	3.52298
P12931	Src	Y419	0, 0	0, 0	0, 0	0, 0	61.9383	174.653	25.5025	-21.5447	-0.557149	0.00074128	-0.992747	-0.0360613	-0.284542	-0.194395	0.027443	-0.283978	0.924478	1.19721	0.13201	-0.498281
P12931	Src	Y530	0, 0	0, 0	0, 0	3, 0	78.4654	78.8132	98.5007	-20.8759	-0.547573	0.114058	-0.419103	0.152397	-0.434282	0.214538	0.472832	0.0676433	1.09639	0.71518	0.950128	-0.648311
P42224	STAT1a/b	S727	0, 0	0, 0	1, 0	0, 0	78.8078	57.3023	36.6035	-19.2814	0.709862	1.50951	0.790176	1.2028	0.934961	1.5731	1.34701	1.19011	1.3251	0.516365	0.934493	-0.251037
P42224	STAT1a/b	Y701	0, 3	2, 2	2, 2	2, 2	123.462	97.2528	93.6805	-25.2832	-2.52935	-1.41012	-2.1491	-1.33286	-2.09478	-2.10653	-2.35134	-2.82572	1.85467	1.02144	-0.0172118	-0.759031
P42224	STAT1a/b	Pan-specific	2, 4	3, 3	3, 2	0, 0	-36.66	576.774	-32.2686	115.842	-8.18772	-9.59239	-2.94157	-0.915898	-3.17715	-2.10286	-0.429228	0.435628	-2.32767	2.53494	1.57319	1.38379
P42224	STAT1a/b	Pan-specific	2, 0	2, 2	2, 2	2, 2	57.8248	119.377	45.2909	-54.7792	-2.36919	-1.84726	-2.28252	-1.53791	-1.88333	-2.17565	-1.92911	-2.97311	0.864891	0.931822	-0.428072	-1.67042
P42224	STAT1a	Pan-specific	0, 0	0, 0	0, 0	3, 0	17.1927	28.851	23.4381	-30.6576	-0.57345	-0.551354	-0.498428	-0.315908	-0.587334	-0.569289	0.106869	-0.591262	0.0366156	0.228407	0.0264254	-1.11702
P52630	STAT2	Pan-specific	4, 4	2, 2	2, 2	0, 0	-36.66	94.6866	416.765	80.3108	-8.18772	-9.59239	-2.75464	-2.01539	-4.76821	-1.98495	-0.138653	0.581921	-2.32767	0.92511	4.07579	1.15293
P52630	STAT2	Y690	0, 0	0, 0	0, 0	0, 0	32.5728	65.5864	56.9931	-7.09402	-0.351778	-0.0351473	-0.191712	0.301089	-0.171159	0.344468	0.499131	0.44521	0.524688	0.616696	0.755082	-0.0862749
P40763	STAT3	Pan-specific	2, 2	0, 0	0, 3	0, 0	5.26804	25.6635	20.6888	39.3511	-3.38375	-3.56455	-0.647985	-0.464742	-0.847715	-0.985906	0.0978133	0.486828	-0.299602	0.229313	-0.202366	0.622432
P40763	STAT3	Pan-specific	0, 2	2, 2	2, 2	2, 2	12.0824	14.787	-30.3334	-62.1171	-1.76612	-1.85895	-1.4287	-1.39962	-1.17244	-2.16117	-1.73144	-3.05249	-0.153813	0.0363868	-1.44789	-2.11372
P40763	STAT3	S727	0, 0	0, 0	0, 0	0, 0	85.5574	38.4849	43.4316	-0.643493	0.325532	1.11512	0.47529	0.776452	0.597057	1.13702	1.16982	1.22873	1.30843	0.376877	0.790713	0.0942528
P40763	STAT3	Y705	0, 0	0, 0	0, 0	0, 0	142.767	58.6321	76.6926	-23.7246	-0.894223	0.174919	-1.00873	-0.611281	-0.906543	-0.533883	-0.568874	-0.895825	1.77167	0.497375	0.545721	-0.523127
Q14765	STAT4	Pan-specific	2, 2	0, 0	0, 0	0, 0	11597.6	108.043	1161.62	8.87475	-8.18772	-3.53933	-2.02476	-0.798046	-3.99675	-1.19641	0.236403	0.429984	7.70283	1.53512	4.10081	0.309734
P42229	STAT5A	Pan-specific	2, 2	2, 2	0, 2	0, 0	-36.66	760.08	148.961	80.8416	-8.18772	-9.59239	-4.07074	-1.269	-2.02171	-1.98565	-0.3372	0.360797	-2.32767	3.50613	0.0527964	1.11681
P42229	STAT5A	Y694	0, 0	2, 2	2, 2	2, 2	26.5574	105.21	-13.3233	-35.8813	-1.51942	-1.57995	-1.8946	-1.24885	-1.16675	-1.98627	-1.6882	-2.39497	-0.100304	0.808098	-1.2001	-1.13085
P51692	STAT5B	Pan-specific	0, 2	2, 0	2, 0	0, 0	-99.7861	238.35	223.56	22.2382	-4.52694	-9.59239	-2.89986	-1.04896	-2.11226	-1.67888	0.264853	0.511231	-8.39394	2.31624	0.634639	0.394209
P42226	STAT6	Pan-specific	2, 2	2, 2	2, 2	0, 0	4672.55	1016.43	22.068	62.3027	-8.18772	-6.71396	-3.9274	-1.13248	-2.25435	-2.63757	-0.0272307	0.529461	2.44217	3.49759	-0.561188	0.890719
P31948	STI1	Pan-specific	0, 0	0, 0	0, 0	0, 0	68.7986	14.7672	58.4825	3.07203	0.526003	1.22018	0.742716	0.861207	0.558313	1.21051	1.15239	1.24456	1.15032	0.148281	0.95508	0.147481
Q8NEF5	STK33	Pan-specific	0, 0	0, 0	0, 0	0, 0	105.245	158.228	78.4336	125.412	-0.847946	0.0140244	-0.889443	0.0416014	-0.424062	0.136749	-0.50673	0.4001	1.42837	1.16512	0.821248	1.45095
O43815	Striatin	Pan-specific	0, 0	0, 0	0, 0	0, 0	64.2055	59.122	23.8625	-4.00415	0.524935	1.15464	0.503141	0.924226	0.640288	1.0209	1.4413	1.49463	1.04348	0.52695	0.557365	0.0853355
P43405	Syk	Pan-specific	2, 2	2, 0	2, 2	0, 0	-36.66	110.186	227.58	83.6197	-8.18772	-9.59239	-1.54717	-0.764242	-1.9611	-1.60567	-0.523973	0.170978	-2.32767	0.979767	0.520491	1.11194
P17600	Synapsin 1	S9	0, 0	0, 0	0, 0	0, 0	157.558	173.218	85.5307	79.8959	-2.0852	-0.859571	-1.96075	-0.96431	-1.35153	-1.01184	-1.41422	-0.941341	2.03099	1.24695	0.497441	0.756622
P17600	Synapsin 1	S605	0, 0	0, 0	0, 0	0, 0	38.9798	130.01	25.2586	-18.9563	-1.14404	-0.825663	-1.57421	-0.765019	-0.773005	-0.799402	-0.586646	-1.00533	0.527588	1.01263	-0.0386551	-0.669904
O43318	TAK1	Pan-specific	0, 0	0, 0	0, 0	0, 0	86.2074	34.3574	3.52617	46.054	-0.838326	-0.0718088	-0.319706	-0.0734284	-0.146018	-0.251346	0.123509	0.573759	1.27019	0.308194	-0.15424	0.72041
O43318	TAK1	Pan-specific	0, 0	0, 0	0, 0	0, 0	142.848	43.0274	27.7364	-1.97326	-1.68333	-0.611201	-0.942481	-0.668408	-0.834432	-1.02711	-0.892087	-0.896068	1.77662	0.342977	-0.282156	-0.00637001
O43318	TAK1	Pan-specific	0, 0	0, 0	0, 0	0, 0	135.547	79.6091	10.3945	26.9717	-2.00793	-1.01791	-1.38302	-0.864911	-0.984671	-1.18792	-1.1727	-1.12056	1.64056	0.648361	-0.297637	0.0834223
O43318	TAK1	Pan-specific	0, 0	0, 0	0, 1	0, 0	62.6498	44.4651	-0.613339	-18.8021	-1.71624	-1.25599	-1.34081	-1.0172	-0.935743	-1.40997	-1.07211	-1.34636	0.762684	0.40497	-0.694458	-0.438803
O43318	TAK1	Pan-specific	4, 4	2, 4	4, 4	0, 0	-36.66	-39.7435	-26.4174	198.69	-8.18772	-9.59239	-6.10464	-6.62699	-6.19606	-8.71578	-1.87516	-0.406884	-2.32767	-0.653668	-3.68986	2.34927
P10636	Tau	S516	0, 0	0, 0	0, 0	0, 0	50.4114	31.8962	32.7439	-18.1275	0.44708	1.0078	0.609429	0.833049	0.582101	1.04457	1.18865	1.03144	0.929162	0.27984	0.677231	-0.251541
P10636	Tau	S515+S519	0, 0	0, 0	0, 0	0, 0	52.9393	19.006	27.3126	-15.6512	0.407128	0.9522	0.725451	0.8388	0.570527	0.973707	1.13767	1.00387	0.903238	0.141847	0.590414	-0.21409
P10636	Tau	S713	0, 0	0, 0	0, 0	0, 0	50.9515	23.7329	29.2552	-25.5662	-0.526729	-0.0815659	-0.1607	0.00762178	-0.315879	-0.151729	0.620214	0.267654	0.737678	0.210639	0.24038	-0.564103
P10636	Tau	S713	0, 0	0, 1	0, 1	0, 0	97.5789	23.6558	51.8337	-34.2928	0.0298351	0.902352	0.0173474	0.181437	0.158198	0.654633	0.438798	0.0105149	1.44585	0.205343	0.726975	-0.685262
P10636	Tau	S717	0, 0	0, 0	0, 0	0, 0	91.6056	31.1452	109.89	3.98501	-0.714328	0.0629547	-0.267983	0.0557155	-0.769337	-0.0719603	-0.0216086	0.00779449	1.28803	0.405079	1.02123	0.0470456
P10636	Tau	S721	0, 0	0, 0	0, 0	0, 0	52.0766	33.0507	32.398	-13.4479	0.411003	0.95447	0.535894	0.788731	0.576403	1.04145	1.10296	1.00854	0.900579	0.316402	0.681018	-0.151076
P10636	Tau	S519	0, 0	0, 0	0, 0	0, 0	114.343	60.4115	62.5599	-10.0906	-0.991719	-0.100887	-0.925962	-0.508107	-0.861461	-0.631237	-0.792512	-0.945766	1.4762	0.522907	0.337138	-0.24521
P10636	Tau	S739	0, 3	0, 0	3, 0	0, 0	52.0751	38.3203	40.5432	-12.4322	0.518031	1.05388	0.479872	0.748364	0.5727	1.00529	1.11224	1.03184	0.887948	0.335994	0.633489	-0.128638
P10636	Tau	T548	0, 0	0, 0	0, 1	0, 0	140.878	260.742	297.537	-26.6971	-1.12311	-0.0806481	-1.52408	-0.324765	-1.7171	-0.258559	-0.0750372	-0.464012	1.72746	1.50084	2.13588	-0.622368
Q9UHD2	TBK1	Pan-specific	0, 3	0, 1	2, 3	0, 0	155.602	-5.22314	199.947	36.6224	-2.32496	-1.20078	-0.81978	-1.04974	-2.42816	-1.94365	-0.6909	-0.347441	1.86288	-0.287768	0.709517	0.549541
Q9UHD2	TBK1	Pan-specific	4, 4	4, 4	4, 4	0, 0	-36.66	-39.7435	-26.4174	2922.01	-8.18772	-9.59239	-6.10464	-6.62699	-6.19606	-8.71578	-5.5277	-0.894647	-2.32767	-0.653668	-3.68986	7.41298
Q02763	TEK (TIE2)	Pan-specific	0, 0	0, 0	0, 0	0, 0	6.72954	-10.0801	-6.3345	-14.9953	-0.388167	-0.521117	-0.222761	-0.425116	-0.316804	-0.602573	-0.38844	-0.619724	-0.220311	-0.25323	-0.418478	-0.370061
Q9UKI8	Tlk1	Pan-specific	0, 0	0, 0	0, 0	0, 0	65.871	10.223	25.0788	-30.1298	-0.919922	-0.302356	-0.772036	-0.589334	-0.675647	-0.540389	-0.446887	-0.786318	1.02337	0.228635	0.198071	-0.543098
Q6XPS3	TPIPb	Pan-specific	0, 0	0, 0	0, 0	0, 0	142.528	-2.4681	27.3211	0.458978	-1.46744	-0.416156	-0.697435	-0.719042	-0.859253	-0.807275	-0.781721	-0.856399	1.74209	-0.0270396	0.076116	-0.119487
Q15628	TRADD	Pan-specific	1, 0	0, 0	0, 0	0, 0	46.3934	-0.0846766	28.7271	-6.09782	0.661359	1.19675	0.766375	0.733827	0.54909	1.02245	1.22536	1.22028	0.887204	-0.0407308	0.693192	-0.0081277
P50591	Trail	Pan-specific	2, 2	2, 2	0, 2	0, 0	-36.66	1587.68	20701.1	110.339	-8.18772	-9.59239	-6.10464	-3.93864	-6.19606	-2.16999	-0.538123	0.291284	-2.32767	2.71055	5.89576	1.32707
P04629	TrkA	Pan-specific	0, 0	0, 0	0, 0	0, 0	27.857	-12.9043	0.341164	-32.1627	-0.648054	-0.515079	-0.331287	-0.537076	-0.421605	-0.616764	-0.427455	-1.01979	0.220352	-0.257527	-0.285789	-0.947742
Q16620	TrkB	Pan-specific	0, 0	0, 0	0, 0	0, 0	57.9739	42.9433	73.7701	5.62449	-0.561068	0.0241679	-0.112138	0.263687	-0.158767	0.461151	0.364503	0.468963	0.969794	0.470311	0.907804	0.167138
P33981	TTK	Pan-specific	0, 1	0, 0	0, 0	0, 0	106.395	47.5906	118.465	-0.812609	-0.514391	0.398607	-0.195229	0.156561	-0.102182	0.750572	0.0192174	-0.056683	1.51293	0.440233	1.24877	-0.121442
P29597	Tyk2	Pan-specific	4, 4	2, 2	4, 2	0, 0	-36.66	-39.7435	-26.4174	288.617	-8.18772	-9.59239	-6.10464	-6.62699	-6.19606	-8.71578	-1.83018	-0.363926	-2.32767	-0.653668	-3.68986	2.34604
P29597	Tyk2	Pan-specific	4, 4	4, 4	4, 4	0, 0	-36.66	-39.7435	-26.4174	920.176	-8.18772	-9.59239	-6.10464	-6.62699	-6.19606	-8.71578	-3.14314	-0.652085	-2.32767	-0.653668	-3.68986	3.98575
Q16832	Tyro10 (DDR2)	Pan-specific	0, 0	0, 0	0, 0	0, 0	18.7526	-12.4641	-9.25309	-29.0843	-0.556525	-0.587146	-0.242548	-0.487148	-0.0900038	-0.450296	-0.333238	-0.868377	-0.0507415	-0.306095	-0.52761	-0.856234
Q16832	Tyro10 (DDR2)	Pan-specific	0, 3	0, 0	0, 0	0, 0	53.4749	43.0387	76.6969	-23.7418	-0.368079	0.215928	-0.0394202	0.336092	-0.0854814	0.595089	-0.106506	-0.386176	0.967757	0.469919	0.996623	-0.447479
P07101	Tyrosine Hydroxylase	S70	2, 1	0, 2	2, 2	2, 2	167.648	16.0077	58.9731	69.6253	-2.35458	-1.22483	-1.40049	-1.30869	-1.91263	-1.9206	-2.27614	-1.80679	1.8721	0.11488	-0.0116576	0.75096
P07101	Tyrosine Hydroxylase	S18	0, 0	0, 0	0, 0	0, 0	31.5792	27.5655	11.1988	-37.1512	-0.410882	-0.130593	-0.722835	-0.489053	-0.542928	-0.630813	-0.488467	-1.09153	0.464466	0.292556	-0.128697	-0.964915
P62988	Ubiquitin	Pan-specific	0, 0	0, 0	0, 0	0, 0	55.0137	-11.3805	70.7692	35.5442	-0.173932	0.372911	-0.386882	-0.602142	-0.701108	-0.29552	0.337299	0.703405	0.906172	-0.269378	0.593941	0.585777
P35968	VEGFR2 (KDR)	Y1054	0, 0	0, 0	0, 0	0, 0	18.6573	-10.6359	8.12287	-13.2237	1.23449	1.47681	1.32183	1.13721	1.167	1.53789	1.44828	1.37644	0.401549	-0.23104	0.54313	-0.114948
P35968	VEGFR2 (KDR)	Y1214	0, 0	0, 3	0, 0	0, 0	24.9933	22.4587	49.0192	5.4171	-0.952614	-0.746737	-0.772249	-0.544345	-0.894044	-0.568629	-0.496617	-0.602671	0.341158	0.285201	0.476536	-0.169688
P51452	VHR	Pan-specific	0, 1	0, 0	0, 0	0, 0	50.1541	21.8967	61.6747	-6.04227	0.575888	1.09286	0.652413	0.793671	0.403908	1.0936	1.15386	1.15921	0.856668	0.176771	1.00998	0.00856911
P08670	Vimentin	S34	0, 0	0, 0	0, 0	0, 0	49.3626	-8.91866	-5.69626	-37.0897	-0.684531	-0.188024	-0.238249	-0.382068	-0.120664	-0.206558	-0.296789	-0.84369	0.822761	-0.179977	-0.125783	-0.875055
Q99986	Vrk1	Pan-specific	0, 0	0, 0	0, 0	0, 0	60.7655	25.1655	30.1981	5.22313	-0.627566	-0.0833047	-0.120629	0.0163725	-0.0064626	0.297606	0.0383476	0.104551	0.901893	0.171444	0.445277	0.105927
P30291	Wee1	Pan-specific	0, 0	0, 0	0, 0	0, 0	28.7065	-7.49687	29.9994	-24.2895	-0.36701	-0.249851	-0.216437	-0.428362	-0.397995	-0.332859	-0.424323	-1.07695	0.194144	-0.265205	0.0953859	-1.04422
O15297	WIP1	Pan-specific	0, 0	0, 0	0, 0	0, 0	42.1321	38.5648	58.2633	2.19468	-0.981743	-0.634724	-0.547523	-0.205148	-0.634268	-0.294907	-0.127258	-0.134478	0.575044	0.428451	0.496958	-0.0115521
P07947	Yes	Pan-specific	2, 2	3, 2	2, 0	3, 3	-36.66	-78.8572	252.469	34.5357	-8.18772	-9.59239	-1.45442	-4.42978	-2.87706	-1.53981	-0.0836401	0.265299	-2.32767	-3.72339	1.95827	0.558309
P07947	Yes	Pan-specific	0, 0	0, 0	0, 0	0, 0	22.6123	21.2844	60.8607	-1.62259	0.582836	0.853325	0.639909	0.80034	0.523665	1.2685	1.07232	1.13859	0.448228	0.200765	1.09074	0.106031
O00506	YSK1	Pan-specific	4, 4	4, 4	4, 4	0, 0	-36.66	-39.7435	-26.4174	108.728	-8.18772	-9.59239	-6.10464	-6.62699	-6.19606	-8.71578	-1.44679	-0.56353	-2.32767	-0.653668	-3.68986	1.41323
P43403	ZAP70	Pan-specific	0, 0	0, 0	0, 0	0, 0	2.79158	-11.6774	4.40536	-12.2903	1.02386	1.00219	1.01686	0.809867	0.890164	1.11736	1.30882	1.23137	-0.0359113	-0.259028	0.332701	-0.123935
P43403	ZAP70	Pan-specific	4, 4	4, 2	4, 4	0, 0	-36.66	-39.7435	-26.4174	136.94	-8.18772	-9.59239	-6.10464	-6.62699	-6.19606	-8.71578	-1.43943	-0.438351	-2.32767	-0.653668	-3.68986	1.60174
P43403	ZAP70	Y292	0, 0	0, 0	0, 0	0, 0	40.9763	3.71833	11.7934	1.68671	0.210843	0.649007	0.502253	0.509378	0.406899	0.598672	0.914637	0.988356	0.72608	0.00891638	0.280831	0.117953
P43403	ZAP70	Y315+Y319	0, 0	0, 0	0, 0	0, 0	22.6171	13.7667	49.8341	-1.75827	0.722288	0.9892	0.739199	0.822534	0.546063	1.17384	1.11247	1.14983	0.442298	0.104286	0.919307	0.0597902
P43403	ZAP70/Syk	Y319/Y352	0, 0	2, 2	2, 2	2, 2	-19.9449	-22.708	48.3864	-28.3478	-1.10231	-1.60584	-1.6465	-1.89506	-1.72173	-1.92569	-1.9882	-2.58434	-0.8344	-0.311056	-0.298675	-0.953831
O43293	ZIPK	Pan-specific	0, 0	0, 0	0, 0	0, 0	9.51127	3.5378	15.4781	-8.58591	-0.917784	-1.274	-0.370861	-0.393148	-0.27393	-0.2876	-0.00583665	-0.154171	-0.590293	-0.02789	-0.0200182	-0.237338
O43293	ZIPK	Pan-specific	0, 0	0, 0	0, 0	0, 0	65.4239	-9.90007	15.9807	3.46747	-0.392487	0.216653	0.384312	0.264322	0.223721	0.414195	0.664247	0.745632	1.0094	-0.150157	0.278929	0.130217
